# Supplementary material
Source: publisher site journal article supplement (http://www.spandidos-publications.com/3955/downloadSupplementary)
Supplement: Supplementary file 1 [file downloadSupplementary]

## Sheet: FTC_vs_FT_real_DEGs
Table SVIII. Differentially expressed genes between the FTC and FT groups.
ID	Group A	Group B	baseMeanA	baseMeanB	baseMean	log2(fold change)	lfcSE	stat	P-value	Adjusted P-value
TRINITY_DN9969_c0_g1	FTC	FT	278.474	7.93765	188.295	5.11495	0.395543	12.9315	2.99×10^-38	2.20×10^-33
TRINITY_DN33996_c0_g1	FTC	FT	3.23358	791.911	266.126	-7.93383	0.61983	-12.8	1.64×10^-37	6.04×10^-33
TRINITY_DN37668_c0_g1	FTC	FT	1516.74	11.7295	1015.07	7.01748	0.556019	12.6209	1.62×10^-36	3.98×10^-32
TRINITY_DN23953_c4_g1	FTC	FT	1502.87	63.8859	1023.21	4.55297	0.362097	12.5739	2.94×10^-36	5.42×10^-32
TRINITY_DN901_c0_g2	FTC	FT	106.495	1077.52	430.169	-3.33065	0.265981	-12.5221	5.65×10^-36	8.33×10^-32
TRINITY_DN5126_c0_g1	FTC	FT	2012.16	507.814	1510.71	1.98617	0.158943	12.4961	7.84×10^-36	9.63×10^-32
TRINITY_DN4574_c0_g1	FTC	FT	21499.6	43.511	14347.6	8.94896	0.720344	12.4232	1.96×10^-35	2.06×10^-31
TRINITY_DN7256_c1_g1	FTC	FT	2061.27	74.2029	1398.91	4.79535	0.397957	12.0499	1.94×10^-33	1.79×10^-29
TRINITY_DN2887_c1_g1	FTC	FT	5.8554	1185.86	399.189	-7.65708	0.682063	-11.2264	3.03×10^-29	2.48×10^-25
TRINITY_DN14929_c0_g1	FTC	FT	41.2673	434.35	172.295	-3.4003	0.304339	-11.1727	5.55×10^-29	4.09×10^-25
TRINITY_DN10425_c0_g1	FTC	FT	1.94813	654.318	219.405	-8.32958	0.791454	-10.5244	6.67×10^-26	4.47×10^-22
TRINITY_DN3898_c0_g2	FTC	FT	98.2615	965.145	387.223	-3.2934	0.313291	-10.5123	7.59×10^-26	4.53×10^-22
TRINITY_DN3996_c0_g1	FTC	FT	12.3787	315.669	113.476	-4.69195	0.446537	-10.5074	7.98×10^-26	4.53×10^-22
TRINITY_DN7262_c0_g1	FTC	FT	5.02214	412.793	140.946	-6.31452	0.615996	-10.2509	1.17×10^-24	6.17×10^-21
TRINITY_DN51000_c0_g1	FTC	FT	328.155	55.3052	237.205	2.56836	0.258173	9.94823	2.57×10^-23	1.26×10^-19
TRINITY_DN5805_c1_g1	FTC	FT	12.188	228.066	84.1473	-4.23321	0.434241	-9.74852	1.87×10^-22	8.62×10^-19
TRINITY_DN34209_c0_g2	FTC	FT	4.50348	468.554	159.187	-6.71517	0.692956	-9.69062	3.31×10^-22	1.43×10^-18
TRINITY_DN9397_c0_g1	FTC	FT	693.68	50.8238	479.395	3.76816	0.389993	9.66211	4.37×10^-22	1.79×10^-18
TRINITY_DN2396_c3_g1	FTC	FT	508.207	16.6048	344.339	4.93263	0.515668	9.56552	1.12×10^-21	4.33×10^-18
TRINITY_DN27454_c0_g2	FTC	FT	1340.47	413.698	1031.54	1.69577	0.18294	9.26957	1.87×10^-20	6.89×10^-17
TRINITY_DN73_c0_g1	FTC	FT	78.1947	358.097	171.495	-2.19437	0.237778	-9.22867	2.74×10^-20	9.50×10^-17
TRINITY_DN7087_c0_g1	FTC	FT	525.027	1967.81	1005.95	-1.90552	0.206561	-9.22497	2.84×10^-20	9.50×10^-17
TRINITY_DN951_c0_g1	FTC	FT	2447.51	807.817	1900.94	1.59883	0.17755	9.00495	2.16×10^-19	6.91×10^-16
TRINITY_DN14489_c0_g1	FTC	FT	1346.45	353.526	1015.48	1.92879	0.219988	8.7677	1.82×10^-18	5.60×10^-15
TRINITY_DN527_c0_g1	FTC	FT	2027.93	225.366	1427.08	3.17012	0.365546	8.67227	4.24×10^-18	1.25×10^-14
TRINITY_DN2480_c5_g1	FTC	FT	5.31658	518.148	176.26	-6.60879	0.770734	-8.57466	9.94×10^-18	2.82×10^-14
TRINITY_DN22600_c0_g1	FTC	FT	470.455	17.3342	319.415	4.76201	0.558339	8.52889	1.48×10^-17	4.03×10^-14
TRINITY_DN1352_c0_g1	FTC	FT	68.8596	1201.57	446.43	-4.11642	0.485377	-8.48088	2.23×10^-17	5.88×10^-14
TRINITY_DN4065_c0_g1	FTC	FT	4.63835	304.404	104.56	-6.07329	0.717978	-8.45887	2.70×10^-17	6.86×10^-14
TRINITY_DN2051_c0_g1	FTC	FT	483.148	14.3118	326.869	5.07222	0.601282	8.43567	3.29×10^-17	8.09×10^-14
TRINITY_DN4128_c1_g2	FTC	FT	5.80394	515.135	175.581	-6.40646	0.7671	-8.35154	6.74×10^-17	1.60×10^-13
TRINITY_DN4284_c2_g3	FTC	FT	855.621	77.3236	596.189	3.46628	0.417617	8.30014	1.04×10^-16	2.40×10^-13
TRINITY_DN1099_c0_g1	FTC	FT	3.00441	388.092	131.367	-7.02882	0.854997	-8.22087	2.02×10^-16	4.51×10^-13
TRINITY_DN2947_c0_g2	FTC	FT	2.50389	395.567	133.525	-7.16535	0.873334	-8.2046	2.31×10^-16	5.01×10^-13
TRINITY_DN20845_c0_g1	FTC	FT	0	1723.06	574.353	-12.9064	1.57372	-8.2012	2.38×10^-16	5.01×10^-13
TRINITY_DN4343_c1_g1	FTC	FT	321.862	1111.72	585.148	-1.78526	0.217904	-8.19288	2.55×10^-16	5.17×10^-13
TRINITY_DN8756_c0_g1	FTC	FT	2.35241	195.272	66.6589	-6.37343	0.77812	-8.19081	2.59×10^-16	5.17×10^-13
TRINITY_DN25548_c0_g1	FTC	FT	4.18002	252.439	86.933	-5.98568	0.732649	-8.16992	3.09×10^-16	5.99×10^-13
TRINITY_DN1587_c0_g2	FTC	FT	544.607	0	363.072	12.1563	1.4888	8.16513	3.21×10^-16	6.07×10^-13
TRINITY_DN2478_c0_g1	FTC	FT	219.576	831.348	423.5	-1.9209	0.236603	-8.11867	4.71×10^-16	8.69×10^-13
TRINITY_DN32713_c5_g1	FTC	FT	1298.46	0	865.638	13.4108	1.66251	8.06663	7.23×10^-16	1.27×10^-12
TRINITY_DN2710_c1_g1	FTC	FT	185.372	1154.49	508.411	-2.64343	0.327714	-8.06628	7.25×10^-16	1.27×10^-12
TRINITY_DN6965_c0_g3	FTC	FT	109.576	15.2013	78.118	2.851	0.353819	8.05778	7.77×10^-16	1.33×10^-12
TRINITY_DN2899_c4_g1	FTC	FT	10.1064	181.311	67.1745	-4.15134	0.515627	-8.05105	8.21×10^-16	1.38×10^-12
TRINITY_DN6014_c0_g1	FTC	FT	296.901	2319.64	971.146	-2.96934	0.370383	-8.01693	1.08×10^-15	1.78×10^-12
TRINITY_DN83608_c1_g1	FTC	FT	448.282	0	298.855	11.8759	1.48454	7.99974	1.25×10^-15	2.00×10^-12
TRINITY_DN2450_c7_g1	FTC	FT	18392.7	0	12261.8	29.6916	3.71723	7.98758	1.38×10^-15	2.16×10^-12
TRINITY_DN93111_c0_g1	FTC	FT	14.5466	195.986	75.0264	-3.7563	0.470675	-7.98068	1.46×10^-15	2.23×10^-12
TRINITY_DN57887_c0_g2	FTC	FT	6.50459	266.221	93.0769	-5.38868	0.675429	-7.97816	1.49×10^-15	2.23×10^-12
TRINITY_DN10869_c0_g1	FTC	FT	844.832	56.6932	582.119	3.89602	0.488904	7.96889	1.60×10^-15	2.36×10^-12
TRINITY_DN3372_c2_g1	FTC	FT	56.2572	288.08	133.531	-2.36612	0.297146	-7.96281	1.68×10^-15	2.43×10^-12
TRINITY_DN68307_c4_g1	FTC	FT	8.87989	160.062	59.2738	-4.15145	0.522661	-7.94291	1.97×10^-15	2.80×10^-12
TRINITY_DN11880_c0_g1	FTC	FT	3713.23	9.74127	2478.73	8.57468	1.09261	7.84786	4.23×10^-15	5.89×10^-12
TRINITY_DN2410_c0_g1	FTC	FT	1577.08	692.338	1282.17	1.1879	0.151507	7.84055	4.49×10^-15	6.03×10^-12
TRINITY_DN2736_c2_g1	FTC	FT	2804.34	108.407	1905.7	4.6927	0.598547	7.84015	4.50×10^-15	6.03×10^-12
TRINITY_DN8033_c1_g1	FTC	FT	257.011	1880.91	798.312	-2.86943	0.36803	-7.79671	6.35×10^-15	8.36×10^-12
TRINITY_DN1873_c5_g1	FTC	FT	71.0102	363.729	168.583	-2.36656	0.303803	-7.78979	6.71×10^-15	8.68×10^-12
TRINITY_DN5966_c1_g2	FTC	FT	14.9938	255.843	95.2768	-4.07274	0.525447	-7.751	9.12×10^-15	1.16×10^-11
TRINITY_DN24712_c0_g1	FTC	FT	31.8236	626.668	230.105	-4.28745	0.555931	-7.7122	1.24×10^-14	1.54×10^-11
TRINITY_DN9761_c4_g1	FTC	FT	0	1824.82	608.272	-12.9892	1.68718	-7.69876	1.37×10^-14	1.69×10^-11
TRINITY_DN1408_c3_g1	FTC	FT	3.48757	287.393	98.1228	-6.35577	0.826625	-7.68882	1.48×10^-14	1.79×10^-11
TRINITY_DN127_c0_g5	FTC	FT	44.4476	4029.82	1372.91	-6.51495	0.848022	-7.68252	1.56×10^-14	1.85×10^-11
TRINITY_DN96632_c0_g1	FTC	FT	240.587	12.9884	164.721	4.21207	0.552066	7.62964	2.35×10^-14	2.75×10^-11
TRINITY_DN1753_c0_g1	FTC	FT	117.123	430.85	221.699	-1.87583	0.246358	-7.61425	2.65×10^-14	3.05×10^-11
TRINITY_DN13070_c0_g2	FTC	FT	833.206	326.633	664.348	1.35168	0.177619	7.60999	2.74×10^-14	3.11×10^-11
TRINITY_DN2807_c0_g2	FTC	FT	361.943	68.3027	264.063	2.40349	0.317198	7.57724	3.53×10^-14	3.94×10^-11
TRINITY_DN561_c3_g2	FTC	FT	1026.78	184.576	746.046	2.47511	0.326742	7.57513	3.59×10^-14	3.95×10^-11
TRINITY_DN7170_c0_g1	FTC	FT	539.845	1453.33	844.341	-1.42704	0.188789	-7.5589	4.07×10^-14	4.41×10^-11
TRINITY_DN1528_c1_g4	FTC	FT	168.578	11.5049	116.22	3.88134	0.513609	7.55699	4.12×10^-14	4.41×10^-11
TRINITY_DN1653_c2_g1	FTC	FT	15.3054	147.403	59.3378	-3.26757	0.433224	-7.54244	4.61×10^-14	4.86×10^-11
TRINITY_DN1865_c0_g3	FTC	FT	749.689	233.246	577.541	1.68611	0.223722	7.53664	4.82×10^-14	5.01×10^-11
TRINITY_DN832_c0_g1	FTC	FT	601.832	140.684	448.116	2.09563	0.278263	7.5311	5.03×10^-14	5.15×10^-11
TRINITY_DN80078_c0_g1	FTC	FT	16667.3	0	11111.5	29.5483	3.92883	7.52088	5.44×10^-14	5.49×10^-11
TRINITY_DN7992_c0_g1	FTC	FT	3796.31	267.305	2619.98	3.82785	0.510126	7.50374	6.20×10^-14	6.18×10^-11
TRINITY_DN7540_c0_g1	FTC	FT	13.814	424.159	150.596	-4.93255	0.657621	-7.5006	6.35×10^-14	6.24×10^-11
TRINITY_DN7882_c0_g2	FTC	FT	53.3019	1539.47	548.69	-4.84188	0.651229	-7.43498	1.05×10^-13	1.01×10^-10
TRINITY_DN20794_c0_g1	FTC	FT	55.7625	16164.5	5425.33	-8.17682	1.10032	-7.43134	1.08×10^-13	1.03×10^-10
TRINITY_DN16229_c0_g1	FTC	FT	1852.23	253.446	1319.3	2.87008	0.387606	7.40463	1.32×10^-13	1.24×10^-10
TRINITY_DN2850_c2_g3	FTC	FT	900.113	10.9601	603.728	6.35887	0.86082	7.387	1.50×10^-13	1.40×10^-10
TRINITY_DN43760_c1_g1	FTC	FT	36.9436	479.844	184.577	-3.68883	0.499619	-7.38328	1.54×10^-13	1.42×10^-10
TRINITY_DN20270_c0_g1	FTC	FT	3.55391	272.574	93.2272	-6.20458	0.842246	-7.36671	1.75×10^-13	1.57×10^-10
TRINITY_DN2062_c0_g1	FTC	FT	4270.68	656.952	3066.1	2.70032	0.366606	7.36574	1.76×10^-13	1.57×10^-10
TRINITY_DN41226_c0_g1	FTC	FT	75.7127	1.56352	50.9963	5.56203	0.755193	7.36504	1.77×10^-13	1.57×10^-10
TRINITY_DN3524_c0_g3	FTC	FT	2963.87	6.37413	1978.04	8.85863	1.20535	7.34943	1.99×10^-13	1.75×10^-10
TRINITY_DN1304_c6_g1	FTC	FT	16.4245	250.546	94.4649	-3.90482	0.532693	-7.33034	2.30×10^-13	1.97×10^-10
TRINITY_DN14718_c1_g1	FTC	FT	0	1214.86	404.955	-12.4022	1.69199	-7.32994	2.30×10^-13	1.97×10^-10
TRINITY_DN12610_c0_g1	FTC	FT	144.902	25.6966	105.167	2.48991	0.340062	7.32192	2.44×10^-13	2.07×10^-10
TRINITY_DN5938_c2_g1	FTC	FT	1090.51	49.5805	743.536	4.45863	0.611159	7.29537	2.98×10^-13	2.49×10^-10
TRINITY_DN3218_c0_g1	FTC	FT	5939.32	1574.22	4484.29	1.9157	0.262705	7.29222	3.05×10^-13	2.52×10^-10
TRINITY_DN111095_c0_g1	FTC	FT	1773.51	533.704	1360.24	1.73242	0.237614	7.29092	3.08×10^-13	2.52×10^-10
TRINITY_DN39965_c0_g1	FTC	FT	7.00016	223.75	79.2502	-5.02002	0.689322	-7.28255	3.28×10^-13	2.65×10^-10
TRINITY_DN52674_c0_g1	FTC	FT	8.68049	125.661	47.6739	-3.89452	0.536115	-7.26433	3.75×10^-13	3.00×10^-10
TRINITY_DN12041_c0_g2	FTC	FT	230.737	28.5344	163.336	3.01409	0.415369	7.25641	3.97×10^-13	3.15×10^-10
TRINITY_DN8061_c3_g1	FTC	FT	0	662.148	220.716	-11.5266	1.59031	-7.24804	4.23×10^-13	3.32×10^-10
TRINITY_DN43883_c0_g1	FTC	FT	7.98545	1273.57	429.847	-7.35239	1.01848	-7.21897	5.24×10^-13	4.03×10^-10
TRINITY_DN1144_c1_g1	FTC	FT	576.575	1461.17	871.441	-1.3429	0.186032	-7.21863	5.25×10^-13	4.03×10^-10
TRINITY_DN1260_c1_g1	FTC	FT	10.4598	142.739	54.553	-3.78139	0.527531	-7.1681	7.60×10^-13	5.78×10^-10
TRINITY_DN39276_c0_g1	FTC	FT	16.6966	160.591	64.6614	-3.29426	0.460017	-7.16117	8.00×10^-13	6.02×10^-10
TRINITY_DN8909_c6_g1	FTC	FT	5.26058	114.491	41.6709	-4.39174	0.614264	-7.1496	8.70×10^-13	6.48×10^-10
TRINITY_DN1877_c0_g1	FTC	FT	34.189	293.084	120.487	-3.11578	0.435924	-7.14752	8.84×10^-13	6.51×10^-10
TRINITY_DN3746_c1_g2	FTC	FT	256.242	0	170.828	11.0718	1.55347	7.12717	1.02×10^-12	7.43×10^-10
TRINITY_DN9580_c6_g1	FTC	FT	0	613.61	204.537	-11.4168	1.60198	-7.12667	1.03×10^-12	7.43×10^-10
TRINITY_DN507_c1_g1	FTC	FT	85.7578	2.25296	57.9229	5.25334	0.738356	7.11491	1.12×10^-12	7.97×10^-10
TRINITY_DN30457_c0_g1	FTC	FT	0	837.206	279.069	-11.8651	1.66798	-7.11342	1.13×10^-12	7.97×10^-10
TRINITY_DN1233_c0_g1	FTC	FT	7.12304	1240.42	418.222	-7.49945	1.05432	-7.11305	1.14×10^-12	7.97×10^-10
TRINITY_DN91911_c0_g3	FTC	FT	2831.73	0	1887.82	27.0809	3.80984	7.10814	1.18×10^-12	8.18×10^-10
TRINITY_DN9265_c0_g1	FTC	FT	2.56916	178.205	61.1145	-6.08836	0.858897	-7.08857	1.36×10^-12	9.33×10^-10
TRINITY_DN8494_c0_g1	FTC	FT	422.665	31.9507	292.427	3.72389	0.526276	7.07593	1.48×10^-12	1.01×10^-09
TRINITY_DN13200_c4_g1	FTC	FT	6.60203	121.284	44.8293	-4.21484	0.596414	-7.06698	1.58×10^-12	1.07×10^-09
TRINITY_DN7814_c0_g1	FTC	FT	7.47186	189.673	68.2056	-4.62569	0.654867	-7.06355	1.62×10^-12	1.09×10^-09
TRINITY_DN814_c1_g1	FTC	FT	6499.41	18.513	4339.11	8.45495	1.19811	7.05689	1.70×10^-12	1.13×10^-09
TRINITY_DN4614_c0_g1	FTC	FT	299.385	16.5556	205.109	4.18168	0.593001	7.05172	1.77×10^-12	1.16×10^-09
TRINITY_DN11546_c0_g2	FTC	FT	0	598.554	199.518	-11.381	1.61448	-7.0493	1.80×10^-12	1.17×10^-09
TRINITY_DN4128_c1_g3	FTC	FT	8.42414	426.523	147.79	-5.61482	0.798371	-7.03285	2.02×10^-12	1.31×10^-09
TRINITY_DN2909_c0_g1	FTC	FT	29.3336	187.746	82.1379	-2.69161	0.38355	-7.01762	2.26×10^-12	1.45×10^-09
TRINITY_DN11508_c0_g3	FTC	FT	243.595	0	162.397	10.9953	1.5688	7.00874	2.40×10^-12	1.53×10^-09
TRINITY_DN38345_c1_g1	FTC	FT	39718	7150.93	28862.3	2.47357	0.3539	6.98947	2.76×10^-12	1.74×10^-09
TRINITY_DN3541_c2_g1	FTC	FT	3.53234	269.893	92.3193	-6.20202	0.888171	-6.98291	2.89×10^-12	1.81×10^-09
TRINITY_DN17903_c0_g1	FTC	FT	1.65056	1176.12	393.141	-9.32906	1.33779	-6.97351	3.09×10^-12	1.91×10^-09
TRINITY_DN9385_c0_g1	FTC	FT	18.8312	370.317	135.993	-4.28653	0.615505	-6.96424	3.30×10^-12	2.03×10^-09
TRINITY_DN10015_c0_g1	FTC	FT	511.526	0	341.018	12.0661	1.73308	6.96225	3.35×10^-12	2.04×10^-09
TRINITY_DN314_c0_g1	FTC	FT	1596.32	244.994	1145.88	2.70453	0.388532	6.9609	3.38×10^-12	2.04×10^-09
TRINITY_DN706_c0_g1	FTC	FT	59.0089	506.266	208.094	-3.08616	0.44368	-6.95583	3.50×10^-12	2.10×10^-09
TRINITY_DN1474_c4_g1	FTC	FT	51.4662	202.049	101.661	-1.96875	0.283082	-6.95471	3.53×10^-12	2.10×10^-09
TRINITY_DN6613_c1_g1	FTC	FT	0	649.675	216.558	-11.4992	1.65787	-6.93615	4.03×10^-12	2.38×10^-09
TRINITY_DN45517_c0_g1	FTC	FT	0	600.877	200.292	-11.3866	1.64191	-6.93495	4.06×10^-12	2.38×10^-09
TRINITY_DN5899_c1_g2	FTC	FT	190.069	43.6802	141.273	2.11782	0.305752	6.92658	4.31×10^-12	2.50×10^-09
TRINITY_DN26599_c0_g2	FTC	FT	2.8634	288.496	98.0743	-6.63444	0.958024	-6.92513	4.36×10^-12	2.51×10^-09
TRINITY_DN5809_c2_g1	FTC	FT	15.1492	188.35	72.8826	-3.64143	0.526379	-6.9179	4.58×10^-12	2.62×10^-09
TRINITY_DN740_c0_g2	FTC	FT	1127.14	326.685	860.323	1.78684	0.259196	6.89377	5.43×10^-12	3.08×10^-09
TRINITY_DN31137_c0_g1	FTC	FT	538.949	0	359.299	12.1423	1.76465	6.88087	5.95×10^-12	3.35×10^-09
TRINITY_DN9463_c0_g6	FTC	FT	0	611.817	203.939	-11.4126	1.65957	-6.87682	6.12×10^-12	3.42×10^-09
TRINITY_DN68375_c1_g1	FTC	FT	267.755	0	178.503	11.1311	1.62427	6.85299	7.23×10^-12	4.01×10^-09
TRINITY_DN15636_c5_g1	FTC	FT	0	516.007	172.002	-11.1669	1.62972	-6.85201	7.28×10^-12	4.01×10^-09
TRINITY_DN10877_c0_g4	FTC	FT	164.34	1457.31	595.33	-3.14994	0.459918	-6.8489	7.44×10^-12	4.06×10^-09
TRINITY_DN2024_c1_g2	FTC	FT	767.089	210.799	581.659	1.86459	0.272417	6.84461	7.67×10^-12	4.16×10^-09
TRINITY_DN72414_c0_g1	FTC	FT	337.557	0.609401	225.241	9.05289	1.32344	6.84044	7.89×10^-12	4.25×10^-09
TRINITY_DN755_c2_g1	FTC	FT	27.6193	279.392	111.543	-3.35248	0.490824	-6.83032	8.47×10^-12	4.53×10^-09
TRINITY_DN6545_c0_g3	FTC	FT	165.472	0	110.315	10.4361	1.52855	6.82744	8.64×10^-12	4.58×10^-09
TRINITY_DN24167_c1_g1	FTC	FT	0	1629.94	543.313	-12.8262	1.87983	-6.82307	8.91×10^-12	4.69×10^-09
TRINITY_DN10059_c0_g1	FTC	FT	54.7431	3.51177	37.666	3.95146	0.579277	6.82137	9.02×10^-12	4.71×10^-09
TRINITY_DN39343_c0_g1	FTC	FT	225.475	55.7145	168.888	2.01779	0.296245	6.81121	9.68×10^-12	5.02×10^-09
TRINITY_DN746_c2_g1	FTC	FT	328.67	1312.94	656.76	-2.00166	0.29521	-6.78045	1.20×10^-11	6.14×10^-09
TRINITY_DN7042_c0_g1	FTC	FT	6.09524	175.829	62.6731	-4.81066	0.709517	-6.78018	1.20×10^-11	6.14×10^-09
TRINITY_DN3173_c2_g1	FTC	FT	20.9538	560.421	200.776	-4.71848	0.696181	-6.77766	1.22×10^-11	6.20×10^-09
TRINITY_DN2610_c6_g1	FTC	FT	0	503.25	167.75	-11.1308	1.64248	-6.77679	1.23×10^-11	6.20×10^-09
TRINITY_DN24985_c1_g1	FTC	FT	7764.82	0	5176.55	28.4882	4.20604	6.77317	1.26×10^-11	6.32×10^-09
TRINITY_DN3128_c2_g2	FTC	FT	0	490.335	163.445	-11.0933	1.63836	-6.77094	1.28×10^-11	6.37×10^-09
TRINITY_DN44546_c1_g1	FTC	FT	10.2847	114.476	45.0151	-3.47575	0.513515	-6.76855	1.30×10^-11	6.44×10^-09
TRINITY_DN2831_c2_g2	FTC	FT	25.5098	245.338	98.786	-3.23714	0.479108	-6.75659	1.41×10^-11	6.94×10^-09
TRINITY_DN3893_c0_g2	FTC	FT	348.967	64.357	254.097	2.4359	0.360581	6.75549	1.42×10^-11	6.95×10^-09
TRINITY_DN3464_c1_g1	FTC	FT	93.186	909.066	365.146	-3.27846	0.48549	-6.75289	1.45×10^-11	7.03×10^-09
TRINITY_DN8741_c5_g1	FTC	FT	176.394	0	117.596	10.5287	1.56313	6.73563	1.63×10^-11	7.86×10^-09
TRINITY_DN4623_c12_g1	FTC	FT	11354	0	7569.34	28.3241	4.20604	6.73416	1.65×10^-11	7.89×10^-09
TRINITY_DN4979_c0_g1	FTC	FT	2170.92	0	1447.28	14.1521	2.10655	6.71816	1.84×10^-11	8.75×10^-09
TRINITY_DN49408_c0_g1	FTC	FT	4.00911	412.011	140.01	-6.62843	0.988258	-6.70719	1.98×10^-11	9.37×10^-09
TRINITY_DN5231_c0_g1	FTC	FT	38.7075	1580.69	552.702	-5.36641	0.801107	-6.69875	2.10×10^-11	9.87×10^-09
TRINITY_DN2040_c0_g1	FTC	FT	51.7747	293.075	132.208	-2.50093	0.373911	-6.68859	2.25×10^-11	1.05×10^-08
TRINITY_DN4395_c2_g2	FTC	FT	62.8658	2.90237	42.878	4.43563	0.663239	6.68783	2.26×10^-11	1.05×10^-08
TRINITY_DN1230_c0_g1	FTC	FT	227.81	824.582	426.734	-1.85843	0.278077	-6.68317	2.34×10^-11	1.08×10^-08
TRINITY_DN5635_c0_g3	FTC	FT	545.42	128.474	406.438	2.0876	0.312547	6.67932	2.40×10^-11	1.10×10^-08
TRINITY_DN6115_c2_g1	FTC	FT	2137.95	0	1425.3	26.689	3.99669	6.67779	2.43×10^-11	1.10×10^-08
TRINITY_DN4405_c0_g2	FTC	FT	10.2754	129.939	50.1633	-3.65889	0.548277	-6.67342	2.50×10^-11	1.13×10^-08
TRINITY_DN13043_c1_g1	FTC	FT	0	8540.14	2846.71	-15.2156	2.28148	-6.66917	2.57×10^-11	1.16×10^-08
TRINITY_DN5604_c0_g1	FTC	FT	20.6634	305.272	115.533	-3.88022	0.5822	-6.66475	2.65×10^-11	1.18×10^-08
TRINITY_DN44734_c4_g1	FTC	FT	0	454.962	151.654	-10.9852	1.65062	-6.65522	2.83×10^-11	1.26×10^-08
TRINITY_DN11_c1_g1	FTC	FT	2985.42	775.125	2248.65	1.94552	0.292691	6.64701	2.99×10^-11	1.32×10^-08
TRINITY_DN2615_c8_g1	FTC	FT	4.14711	172.78	60.3579	-5.33526	0.803064	-6.64363	3.06×10^-11	1.34×10^-08
TRINITY_DN21252_c0_g1	FTC	FT	5191.78	0	3461.19	27.9255	4.20605	6.63938	3.15×10^-11	1.37×10^-08
TRINITY_DN15241_c2_g2	FTC	FT	0	554.002	184.667	-11.2694	1.69839	-6.63534	3.24×10^-11	1.40×10^-08
TRINITY_DN3400_c0_g3	FTC	FT	710.823	14.7274	478.791	5.59705	0.844755	6.62565	3.46×10^-11	1.49×10^-08
TRINITY_DN1505_c2_g1	FTC	FT	526.57	0	351.047	12.1084	1.82901	6.62017	3.59×10^-11	1.53×10^-08
TRINITY_DN74352_c5_g1	FTC	FT	142.923	4.77059	96.8722	4.8945	0.739362	6.61989	3.59×10^-11	1.53×10^-08
TRINITY_DN13774_c2_g2	FTC	FT	151.792	0	101.195	10.3127	1.55788	6.61966	3.60×10^-11	1.53×10^-08
TRINITY_DN20105_c0_g1	FTC	FT	1092.32	22.2249	735.621	5.61914	0.849113	6.61766	3.65×10^-11	1.54×10^-08
TRINITY_DN9842_c8_g1	FTC	FT	0	565.281	188.427	-11.2984	1.70791	-6.61535	3.71×10^-11	1.55×10^-08
TRINITY_DN10644_c0_g1	FTC	FT	3.76766	102.528	36.6878	-4.68779	0.708927	-6.61251	3.78×10^-11	1.57×10^-08
TRINITY_DN6048_c1_g2	FTC	FT	126.912	452.023	235.282	-1.82759	0.276532	-6.60897	3.87×10^-11	1.60×10^-08
TRINITY_DN20868_c0_g1	FTC	FT	4.24962	86.5727	31.6907	-4.3759	0.662299	-6.60713	3.92×10^-11	1.61×10^-08
TRINITY_DN448_c0_g2	FTC	FT	0	497.858	165.953	-11.1152	1.6828	-6.60517	3.97×10^-11	1.62×10^-08
TRINITY_DN36869_c0_g2	FTC	FT	4754.13	0	3169.42	27.7811	4.20605	6.60504	3.97×10^-11	1.62×10^-08
TRINITY_DN4736_c2_g1	FTC	FT	0.229167	267.698	89.3855	-9.49885	1.43973	-6.59768	4.18×10^-11	1.69×10^-08
TRINITY_DN4832_c9_g1	FTC	FT	0	493.922	164.641	-11.1038	1.68366	-6.595	4.25×10^-11	1.71×10^-08
TRINITY_DN2103_c4_g1	FTC	FT	123.724	28.559	92.0025	2.10894	0.320331	6.58362	4.59×10^-11	1.84×10^-08
TRINITY_DN24073_c0_g1	FTC	FT	1.74378	116.381	39.9563	-6.04789	0.919172	-6.57971	4.71×10^-11	1.88×10^-08
TRINITY_DN2837_c0_g2	FTC	FT	348.881	6.99897	234.92	5.64832	0.859327	6.57295	4.93×10^-11	1.95×10^-08
TRINITY_DN834_c0_g2	FTC	FT	0	467.714	155.905	-11.0251	1.67797	-6.5705	5.01×10^-11	1.98×10^-08
TRINITY_DN21539_c0_g1	FTC	FT	9.23106	269.466	95.976	-4.84279	0.737773	-6.56406	5.24×10^-11	2.05×10^-08
TRINITY_DN30170_c0_g3	FTC	FT	560.157	3.06244	374.459	7.53224	1.14916	6.55455	5.58×10^-11	2.18×10^-08
TRINITY_DN23681_c0_g1	FTC	FT	0	473.637	157.879	-11.0433	1.6867	-6.54727	5.86×10^-11	2.27×10^-08
TRINITY_DN1058_c0_g1	FTC	FT	485.975	0.954119	324.301	8.98171	1.37363	6.53868	6.21×10^-11	2.40×10^-08
TRINITY_DN49737_c0_g1	FTC	FT	368.113	0	245.409	11.5932	1.77361	6.53652	6.30×10^-11	2.42×10^-08
TRINITY_DN6873_c0_g1	FTC	FT	399.21	52.5566	283.659	2.92136	0.447005	6.53541	6.34×10^-11	2.42×10^-08
TRINITY_DN5625_c2_g1	FTC	FT	53.5073	5.84476	37.6198	3.2005	0.490034	6.53118	6.53×10^-11	2.48×10^-08
TRINITY_DN221_c6_g1	FTC	FT	100.958	298.018	166.645	-1.55983	0.239037	-6.52549	6.78×10^-11	2.56×10^-08
TRINITY_DN1866_c1_g1	FTC	FT	2.5027	332.39	112.465	-7.09179	1.08782	-6.5193	7.06×10^-11	2.66×10^-08
TRINITY_DN2589_c7_g1	FTC	FT	1.48365	153.85	52.2726	-6.70557	1.02997	-6.51046	7.49×10^-11	2.80×10^-08
TRINITY_DN10705_c1_g1	FTC	FT	151.123	45.2592	115.835	1.73453	0.266477	6.50911	7.56×10^-11	2.81×10^-08
TRINITY_DN19824_c1_g1	FTC	FT	5626.06	0	3750.71	27.3421	4.20605	6.50067	8.00×10^-11	2.96×10^-08
TRINITY_DN10402_c0_g1	FTC	FT	13.255	119.687	48.7322	-3.175	0.489216	-6.48997	8.59×10^-11	3.16×10^-08
TRINITY_DN98912_c0_g1	FTC	FT	3273.63	0	2182.42	27.2852	4.20606	6.48711	8.75×10^-11	3.21×10^-08
TRINITY_DN24416_c1_g1	FTC	FT	204.905	0	136.603	10.7447	1.65909	6.47629	9.40×10^-11	3.43×10^-08
TRINITY_DN131846_c9_g1	FTC	FT	0	402.704	134.235	-10.8092	1.67237	-6.46342	1.02×10^-10	3.72×10^-08
TRINITY_DN65972_c0_g1	FTC	FT	0	443.25	147.75	-10.9476	1.69615	-6.4544	1.09×10^-10	3.93×10^-08
TRINITY_DN5593_c1_g1	FTC	FT	3.18212	491.071	165.812	-7.17078	1.1113	-6.45259	1.10×10^-10	3.95×10^-08
TRINITY_DN15592_c0_g2	FTC	FT	32.4253	142.977	69.2758	-2.12991	0.330198	-6.45039	1.12×10^-10	3.99×10^-08
TRINITY_DN5194_c1_g1	FTC	FT	204.516	0	136.344	10.7423	1.66593	6.44823	1.13×10^-10	4.02×10^-08
TRINITY_DN1883_c0_g1	FTC	FT	313.598	83.3502	236.848	1.90851	0.295984	6.448	1.13×10^-10	4.02×10^-08
TRINITY_DN57410_c0_g1	FTC	FT	2816.82	0	1877.88	27.0737	4.20606	6.43683	1.22×10^-10	4.30×10^-08
TRINITY_DN2227_c1_g1	FTC	FT	24940.8	4601.04	18160.9	2.43852	0.379546	6.42484	1.32×10^-10	4.63×10^-08
TRINITY_DN6249_c1_g1	FTC	FT	0	859.257	286.419	-11.9026	1.85473	-6.41743	1.39×10^-10	4.84×10^-08
TRINITY_DN71507_c0_g1	FTC	FT	2651.7	0	1767.8	26.9886	4.20606	6.41661	1.39×10^-10	4.84×10^-08
TRINITY_DN10675_c0_g1	FTC	FT	348.618	0	232.412	11.5134	1.79446	6.4161	1.40×10^-10	4.84×10^-08
TRINITY_DN1542_c0_g4	FTC	FT	1320.41	492.096	1044.3	1.42474	0.222135	6.41382	1.42×10^-10	4.89×10^-08
TRINITY_DN18760_c1_g1	FTC	FT	427	0	284.666	11.8064	1.84241	6.40811	1.47×10^-10	5.05×10^-08
TRINITY_DN32531_c0_g1	FTC	FT	47155.4	4346.71	32885.8	3.43942	0.536977	6.40514	1.50×10^-10	5.13×10^-08
TRINITY_DN13530_c0_g1	FTC	FT	0	686.546	228.849	-11.5789	1.81024	-6.39631	1.59×10^-10	5.41×10^-08
TRINITY_DN8213_c2_g1	FTC	FT	0	408.626	136.209	-10.8303	1.69363	-6.39471	1.61×10^-10	5.44×10^-08
TRINITY_DN39669_c1_g1	FTC	FT	2433.44	0	1622.29	26.8697	4.20606	6.38832	1.68×10^-10	5.65×10^-08
TRINITY_DN98391_c0_g3	FTC	FT	2362.27	0	1574.85	26.8275	4.20606	6.37828	1.79×10^-10	6.00×10^-08
TRINITY_DN47750_c0_g1	FTC	FT	65.9473	245.452	125.782	-1.8909	0.296565	-6.37602	1.82×10^-10	6.06×10^-08
TRINITY_DN7615_c7_g1	FTC	FT	412.88	0	275.253	11.7585	1.84592	6.36997	1.89×10^-10	6.25×10^-08
TRINITY_DN155_c1_g1	FTC	FT	54.9011	879.693	329.832	-4.00005	0.627989	-6.36962	1.89×10^-10	6.25×10^-08
TRINITY_DN2092_c17_g1	FTC	FT	67.8342	216.45	117.373	-1.67269	0.262617	-6.36933	1.90×10^-10	6.25×10^-08
TRINITY_DN43163_c2_g1	FTC	FT	0	378.98	126.327	-10.7216	1.68384	-6.36736	1.92×10^-10	6.28×10^-08
TRINITY_DN3171_c0_g2	FTC	FT	1777.02	605.566	1386.54	1.5532	0.24394	6.36714	1.93×10^-10	6.28×10^-08
TRINITY_DN6967_c0_g1	FTC	FT	2446.01	23.7729	1638.6	6.684	1.05048	6.36279	1.98×10^-10	6.43×10^-08
TRINITY_DN6113_c0_g3	FTC	FT	46.9919	225.998	106.66	-2.25741	0.355069	-6.35768	2.05×10^-10	6.62×10^-08
TRINITY_DN9163_c3_g1	FTC	FT	42.8457	197.392	94.3613	-2.18992	0.344578	-6.35536	2.08×10^-10	6.68×10^-08
TRINITY_DN3211_c3_g1	FTC	FT	41.5855	207.087	96.7528	-2.33192	0.366947	-6.35491	2.09×10^-10	6.68×10^-08
TRINITY_DN7829_c0_g1	FTC	FT	4.9793	133.223	47.7271	-4.82392	0.75919	-6.35404	2.10×10^-10	6.69×10^-08
TRINITY_DN48443_c2_g1	FTC	FT	0	375.124	125.041	-10.7069	1.68621	-6.34965	2.16×10^-10	6.86×10^-08
TRINITY_DN4949_c1_g1	FTC	FT	2139.33	0	1426.22	26.689	4.20607	6.34535	2.22×10^-10	7.02×10^-08
TRINITY_DN53020_c0_g1	FTC	FT	2.49148	161.059	55.3472	-5.88013	0.927109	-6.34244	2.26×10^-10	7.12×10^-08
TRINITY_DN3734_c0_g2	FTC	FT	38.1433	243.443	106.576	-2.67234	0.421486	-6.34028	2.29×10^-10	7.19×10^-08
TRINITY_DN98847_c0_g2	FTC	FT	0	694.196	231.399	-11.5948	1.83329	-6.32458	2.54×10^-10	7.93×10^-08
TRINITY_DN23111_c1_g1	FTC	FT	2337.08	0	1558.05	26.556	4.20606	6.31374	2.72×10^-10	8.47×10^-08
TRINITY_DN6786_c0_g1	FTC	FT	339.566	12.0497	230.394	4.82264	0.76409	6.31161	2.76×10^-10	8.55×10^-08
TRINITY_DN8627_c0_g2	FTC	FT	1858.72	671.831	1463.09	1.46762	0.23259	6.30988	2.79×10^-10	8.61×10^-08
TRINITY_DN13520_c0_g1	FTC	FT	577.385	0.3047	385.025	10.8079	1.71445	6.304	2.90×10^-10	8.89×10^-08
TRINITY_DN18787_c0_g2	FTC	FT	267.338	0	178.225	11.131	1.7658	6.30363	2.91×10^-10	8.89×10^-08
TRINITY_DN9506_c0_g1	FTC	FT	71.7293	2.21294	48.5571	4.99153	0.792096	6.30168	2.94×10^-10	8.97×10^-08
TRINITY_DN8468_c0_g1	FTC	FT	70.2719	2195.66	778.736	-4.97419	0.790963	-6.28878	3.20×10^-10	9.71×10^-08
TRINITY_DN88268_c1_g1	FTC	FT	84.2644	0	56.1762	9.459	1.50492	6.28538	3.27×10^-10	9.88×10^-08
TRINITY_DN983_c0_g5	FTC	FT	62.076	643.01	255.721	-3.37353	0.536912	-6.28322	3.32×10^-10	9.98×10^-08
TRINITY_DN2169_c0_g1	FTC	FT	2557.41	736.886	1950.57	1.79464	0.285881	6.27756	3.44×10^-10	1.03×10^-07
TRINITY_DN15735_c4_g1	FTC	FT	1697.9	0	1131.93	26.3641	4.20608	6.26809	3.66×10^-10	1.09×10^-07
TRINITY_DN4094_c0_g1	FTC	FT	1882.55	752.641	1505.92	1.32289	0.211169	6.26459	3.74×10^-10	1.11×10^-07
TRINITY_DN620_c0_g1	FTC	FT	715.009	246.926	558.981	1.53525	0.245101	6.26373	3.76×10^-10	1.11×10^-07
TRINITY_DN18735_c3_g1	FTC	FT	1715.48	0	1143.66	26.3399	4.20608	6.26234	3.79×10^-10	1.12×10^-07
TRINITY_DN1549_c1_g1	FTC	FT	2525.59	296.122	1782.44	3.09196	0.49383	6.26117	3.82×10^-10	1.12×10^-07
TRINITY_DN73842_c0_g2	FTC	FT	1631.05	0	1087.36	26.3102	4.20608	6.25529	3.97×10^-10	1.16×10^-07
TRINITY_DN1994_c3_g1	FTC	FT	0	355.192	118.397	-10.6281	1.69932	-6.25432	3.99×10^-10	1.16×10^-07
TRINITY_DN7861_c1_g2	FTC	FT	5.74115	250.07	87.1839	-5.48419	0.877365	-6.25075	4.08×10^-10	1.19×10^-07
TRINITY_DN45023_c2_g1	FTC	FT	2.41574	159.271	54.7008	-5.9683	0.955165	-6.24845	4.15×10^-10	1.20×10^-07
TRINITY_DN13207_c0_g1	FTC	FT	47.6985	1033.19	376.196	-4.42706	0.708821	-6.24567	4.22×10^-10	1.22×10^-07
TRINITY_DN7073_c2_g1	FTC	FT	5.15387	114.861	41.7228	-4.4587	0.714258	-6.24242	4.31×10^-10	1.24×10^-07
TRINITY_DN27376_c0_g2	FTC	FT	2993.63	0	1995.76	26.2482	4.20606	6.24057	4.36×10^-10	1.25×10^-07
TRINITY_DN6238_c1_g1	FTC	FT	140.686	0	93.7909	10.2075	1.63922	6.22707	4.75×10^-10	1.35×10^-07
TRINITY_DN52777_c3_g1	FTC	FT	1449.96	0	966.64	26.1466	4.20609	6.21636	5.09×10^-10	1.44×10^-07
TRINITY_DN6087_c1_g1	FTC	FT	375.05	45.9978	265.366	3.02493	0.486724	6.21487	5.14×10^-10	1.45×10^-07
TRINITY_DN7579_c28_g1	FTC	FT	1401.37	0	934.249	26.0992	4.20609	6.20511	5.47×10^-10	1.54×10^-07
TRINITY_DN49583_c0_g1	FTC	FT	3471	9915.19	5619.06	-1.51467	0.244229	-6.20184	5.58×10^-10	1.56×10^-07
TRINITY_DN3578_c1_g1	FTC	FT	1433	0	955.332	26.081	4.20609	6.20078	5.62×10^-10	1.57×10^-07
TRINITY_DN100701_c0_g1	FTC	FT	1387.85	0	925.232	26.07	4.20609	6.19817	5.71×10^-10	1.59×10^-07
TRINITY_DN784_c0_g1	FTC	FT	1413.53	425.679	1084.24	1.73051	0.279236	6.1973	5.74×10^-10	1.59×10^-07
TRINITY_DN4614_c0_g2	FTC	FT	957.157	16.6602	643.658	5.84469	0.943308	6.19595	5.79×10^-10	1.60×10^-07
TRINITY_DN14458_c1_g2	FTC	FT	2568.43	0	1712.29	26.0417	4.20606	6.19147	5.96×10^-10	1.64×10^-07
TRINITY_DN77517_c5_g1	FTC	FT	1942.72	0	1295.15	26.0131	4.20607	6.18465	6.22×10^-10	1.71×10^-07
TRINITY_DN79445_c0_g1	FTC	FT	1.0129	196.343	66.1228	-7.73474	1.25078	-6.18395	6.25×10^-10	1.71×10^-07
TRINITY_DN16895_c0_g1	FTC	FT	212.098	5.19535	143.131	5.35382	0.866552	6.1783	6.48×10^-10	1.76×10^-07
TRINITY_DN14419_c0_g2	FTC	FT	1232.7	0	821.801	25.9324	4.20609	6.16544	7.03×10^-10	1.90×10^-07
TRINITY_DN127397_c5_g1	FTC	FT	195.115	0	130.077	10.6743	1.73194	6.16321	7.13×10^-10	1.92×10^-07
TRINITY_DN4827_c10_g1	FTC	FT	8.25151	113.833	43.4453	-3.81059	0.61903	-6.15573	7.47×10^-10	2.01×10^-07
TRINITY_DN72227_c0_g2	FTC	FT	52.8667	1.94825	35.8939	4.75636	0.773152	6.1519	7.66×10^-10	2.05×10^-07
TRINITY_DN10491_c1_g2	FTC	FT	0	362.464	120.821	-10.6573	1.73311	-6.14925	7.79×10^-10	2.07×10^-07
TRINITY_DN47774_c0_g1	FTC	FT	0	362.464	120.821	-10.6573	1.73311	-6.14925	7.79×10^-10	2.07×10^-07
TRINITY_DN60991_c0_g1	FTC	FT	18.5639	116.944	51.3574	-2.66491	0.433621	-6.14572	7.96×10^-10	2.11×10^-07
TRINITY_DN115916_c0_g1	FTC	FT	1172.57	0	781.716	25.8433	4.2061	6.14425	8.03×10^-10	2.12×10^-07
TRINITY_DN46642_c1_g1	FTC	FT	8.5358	102.417	39.8296	-3.53877	0.576016	-6.14354	8.07×10^-10	2.12×10^-07
TRINITY_DN17896_c2_g1	FTC	FT	15.8234	159.501	63.716	-3.29624	0.536623	-6.14255	8.12×10^-10	2.13×10^-07
TRINITY_DN267_c3_g1	FTC	FT	113733	22685	83383.5	2.32585	0.37873	6.14117	8.19×10^-10	2.14×10^-07
TRINITY_DN54471_c0_g3	FTC	FT	0	365.611	121.87	-10.6698	1.73746	-6.14101	8.20×10^-10	2.14×10^-07
TRINITY_DN479_c5_g2	FTC	FT	1137.92	0	758.616	25.8087	4.2061	6.13602	8.46×10^-10	2.20×10^-07
TRINITY_DN3496_c1_g1	FTC	FT	964.499	221.218	716.739	2.12499	0.346447	6.13366	8.59×10^-10	2.22×10^-07
TRINITY_DN4404_c1_g1	FTC	FT	96.207	0	64.138	9.65418	1.57424	6.13261	8.65×10^-10	2.23×10^-07
TRINITY_DN61074_c0_g1	FTC	FT	1123.73	0	749.156	25.7766	4.2061	6.1284	8.88×10^-10	2.28×10^-07
TRINITY_DN7816_c1_g1	FTC	FT	0	365.771	121.924	-10.6704	1.74237	-6.12408	9.12×10^-10	2.33×10^-07
TRINITY_DN4120_c0_g1	FTC	FT	867.168	1.60354	578.646	9.07602	1.48207	6.12389	9.13×10^-10	2.33×10^-07
TRINITY_DN4283_c0_g2	FTC	FT	35.854	164.518	78.7421	-2.18826	0.357617	-6.119	9.42×10^-10	2.39×10^-07
TRINITY_DN20484_c0_g3	FTC	FT	1061.41	0	707.605	25.7116	4.2061	6.11293	9.78×10^-10	2.48×10^-07
TRINITY_DN2747_c0_g1	FTC	FT	4.97563	459.146	156.366	-6.50158	1.06388	-6.11118	9.89×10^-10	2.50×10^-07
TRINITY_DN17059_c0_g2	FTC	FT	95.3172	14.1671	68.2672	2.75177	0.451015	6.10128	1.05×10^-09	2.65×10^-07
TRINITY_DN2342_c0_g1	FTC	FT	178.669	949.96	435.766	-2.40793	0.394887	-6.09776	1.08×10^-09	2.69×10^-07
TRINITY_DN54329_c1_g1	FTC	FT	6.49024	92.4266	35.1357	-3.80039	0.623323	-6.09698	1.08×10^-09	2.69×10^-07
TRINITY_DN27907_c0_g1	FTC	FT	24.5166	286.931	111.988	-3.54662	0.581708	-6.09691	1.08×10^-09	2.69×10^-07
TRINITY_DN78322_c0_g1	FTC	FT	999.382	0	666.255	25.6256	4.20611	6.09246	1.11×10^-09	2.76×10^-07
TRINITY_DN4027_c1_g4	FTC	FT	66.8503	573.201	235.634	-3.09693	0.508367	-6.09193	1.12×10^-09	2.76×10^-07
TRINITY_DN1150_c7_g2	FTC	FT	297.217	0	198.145	11.2825	1.85669	6.07667	1.23×10^-09	3.02×10^-07
TRINITY_DN2967_c0_g2	FTC	FT	0.630314	122.26	41.1735	-7.65945	1.26181	-6.07023	1.28×10^-09	3.14×10^-07
TRINITY_DN2183_c6_g1	FTC	FT	4.94833	185.029	64.9751	-5.28828	0.871856	-6.06555	1.32×10^-09	3.21×10^-07
TRINITY_DN4843_c2_g1	FTC	FT	1769.84	0	1179.89	25.5113	4.20608	6.06534	1.32×10^-09	3.21×10^-07
TRINITY_DN5481_c0_g4	FTC	FT	122.159	2635.27	959.863	-4.42726	0.730406	-6.06137	1.35×10^-09	3.28×10^-07
TRINITY_DN2225_c0_g3	FTC	FT	161.369	992.606	438.448	-2.62693	0.43382	-6.05534	1.40×10^-09	3.40×10^-07
TRINITY_DN702_c15_g1	FTC	FT	0	788.141	262.714	-11.7779	1.94584	-6.05285	1.42×10^-09	3.44×10^-07
TRINITY_DN34451_c1_g3	FTC	FT	58.4629	3.81647	40.2474	3.92495	0.648719	6.05031	1.45×10^-09	3.47×10^-07
TRINITY_DN12608_c0_g1	FTC	FT	881.789	0	587.859	25.4482	4.20612	6.05027	1.45×10^-09	3.47×10^-07
TRINITY_DN75100_c1_g1	FTC	FT	876.185	0	584.123	25.4415	4.20612	6.04869	1.46×10^-09	3.49×10^-07
TRINITY_DN13817_c1_g2	FTC	FT	871.221	0	580.814	25.4359	4.20612	6.04736	1.47×10^-09	3.51×10^-07
TRINITY_DN4048_c1_g1	FTC	FT	875.376	0	583.584	25.4344	4.20612	6.047	1.48×10^-09	3.51×10^-07
TRINITY_DN9037_c0_g3	FTC	FT	53.0769	307.935	138.029	-2.54752	0.421511	-6.04378	1.51×10^-09	3.57×10^-07
TRINITY_DN55410_c0_g2	FTC	FT	862.091	0	574.727	25.4159	4.20612	6.0426	1.52×10^-09	3.58×10^-07
TRINITY_DN12118_c2_g2	FTC	FT	0	423.044	141.015	-10.8803	1.80109	-6.04098	1.53×10^-09	3.61×10^-07
TRINITY_DN50767_c2_g1	FTC	FT	837.394	0	558.263	25.38	4.20612	6.03406	1.60×10^-09	3.75×10^-07
TRINITY_DN3836_c6_g1	FTC	FT	0	309.877	103.292	-10.4312	1.72885	-6.03359	1.60×10^-09	3.75×10^-07
TRINITY_DN5961_c5_g1	FTC	FT	832.234	0	554.823	25.3715	4.20613	6.03204	1.62×10^-09	3.78×10^-07
TRINITY_DN5583_c2_g1	FTC	FT	1071.73	0	714.484	25.3672	4.2061	6.03104	1.63×10^-09	3.79×10^-07
TRINITY_DN22853_c0_g2	FTC	FT	239.209	3.71186	160.71	6.02456	0.999023	6.03046	1.63×10^-09	3.79×10^-07
TRINITY_DN1781_c3_g2	FTC	FT	821.613	0	547.742	25.3501	4.20613	6.02695	1.67×10^-09	3.86×10^-07
TRINITY_DN55981_c0_g1	FTC	FT	807.666	0	538.444	25.3298	4.20613	6.02211	1.72×10^-09	3.97×10^-07
TRINITY_DN8375_c1_g2	FTC	FT	803.074	0	535.383	25.3197	4.20613	6.01972	1.75×10^-09	4.01×10^-07
TRINITY_DN4560_c2_g2	FTC	FT	0	332.991	110.997	-10.535	1.75065	-6.01777	1.77×10^-09	4.04×10^-07
TRINITY_DN10809_c0_g1	FTC	FT	798.114	0	532.076	25.3101	4.20613	6.01743	1.77×10^-09	4.04×10^-07
TRINITY_DN9159_c0_g1	FTC	FT	206.564	50.9039	154.677	2.01792	0.335725	6.01064	1.85×10^-09	4.20×10^-07
TRINITY_DN10911_c0_g2	FTC	FT	0	386.3	128.767	-10.7492	1.78902	-6.00843	1.87×10^-09	4.25×10^-07
TRINITY_DN18456_c1_g2	FTC	FT	74.1313	0	49.4209	9.28397	1.5459	6.00553	1.91×10^-09	4.31×10^-07
TRINITY_DN17542_c0_g1	FTC	FT	764.362	0	509.574	25.2512	4.20613	6.00343	1.93×10^-09	4.34×10^-07
TRINITY_DN6989_c0_g1	FTC	FT	11.6123	95.7537	39.6594	-3.08561	0.513983	-6.00333	1.93×10^-09	4.34×10^-07
TRINITY_DN2491_c0_g1	FTC	FT	1217.86	96.8342	844.184	3.65373	0.609597	5.99368	2.05×10^-09	4.60×10^-07
TRINITY_DN31119_c0_g5	FTC	FT	257.741	0	171.828	11.0785	1.84919	5.99097	2.09×10^-09	4.66×10^-07
TRINITY_DN3703_c4_g1	FTC	FT	154.681	12.1389	107.167	3.6638	0.611606	5.99045	2.09×10^-09	4.66×10^-07
TRINITY_DN18177_c0_g1	FTC	FT	731.613	0	487.742	25.1906	4.20614	5.98902	2.11×10^-09	4.66×10^-07
TRINITY_DN35316_c5_g1	FTC	FT	731.613	0	487.742	25.1906	4.20614	5.98902	2.11×10^-09	4.66×10^-07
TRINITY_DN7005_c0_g1	FTC	FT	0.859481	87.656	29.7917	-6.63918	1.10859	-5.98883	2.11×10^-09	4.66×10^-07
TRINITY_DN46683_c0_g1	FTC	FT	726.781	0	484.521	25.177	4.20614	5.98578	2.15×10^-09	4.74×10^-07
TRINITY_DN4919_c4_g1	FTC	FT	715.227	0	476.818	25.1607	4.20614	5.98191	2.21×10^-09	4.84×10^-07
TRINITY_DN2159_c0_g2	FTC	FT	85.1648	680.895	283.742	-2.99508	0.500735	-5.98136	2.21×10^-09	4.84×10^-07
TRINITY_DN8371_c0_g2	FTC	FT	0	303.05	101.017	-10.3991	1.7391	-5.97955	2.24×10^-09	4.87×10^-07
TRINITY_DN1217_c3_g1	FTC	FT	709.601	0	473.067	25.1497	4.20614	5.97928	2.24×10^-09	4.87×10^-07
TRINITY_DN75730_c0_g2	FTC	FT	700.321	0	466.88	25.1288	4.20614	5.97431	2.31×10^-09	5.01×10^-07
TRINITY_DN1140_c6_g4	FTC	FT	15.7944	179.845	70.478	-3.49137	0.584648	-5.97175	2.35×10^-09	5.07×10^-07
TRINITY_DN88903_c0_g1	FTC	FT	817.691	0	545.127	25.1116	4.20613	5.97025	2.37×10^-09	5.10×10^-07
TRINITY_DN12964_c0_g1	FTC	FT	884.582	61.6021	610.256	3.84226	0.643603	5.96992	2.37×10^-09	5.10×10^-07
TRINITY_DN780_c8_g1	FTC	FT	0	589.014	196.338	-11.3578	1.90467	-5.96312	2.47×10^-09	5.30×10^-07
TRINITY_DN49086_c0_g1	FTC	FT	1425.51	0	950.337	25.0708	4.20609	5.96061	2.51×10^-09	5.37×10^-07
TRINITY_DN18460_c0_g1	FTC	FT	1357.96	314.201	1010.04	2.11085	0.354155	5.96024	2.52×10^-09	5.37×10^-07
TRINITY_DN909_c0_g1	FTC	FT	84.2147	6.26952	58.233	3.75361	0.629874	5.95931	2.53×10^-09	5.38×10^-07
TRINITY_DN10993_c0_g1	FTC	FT	155.564	21.0706	110.733	2.87871	0.483155	5.95814	2.55×10^-09	5.40×10^-07
TRINITY_DN3647_c3_g3	FTC	FT	822.443	0	548.295	25.0595	4.20613	5.95785	2.56×10^-09	5.40×10^-07
TRINITY_DN8148_c0_g1	FTC	FT	290.341	8.62709	196.436	5.07184	0.851511	5.95628	2.58×10^-09	5.43×10^-07
TRINITY_DN4791_c7_g1	FTC	FT	62.0742	3.28711	42.4785	4.24236	0.712749	5.95211	2.65×10^-09	5.56×10^-07
TRINITY_DN53221_c0_g3	FTC	FT	654.231	67.1639	458.542	3.28425	0.551837	5.95148	2.66×10^-09	5.56×10^-07
TRINITY_DN60072_c0_g1	FTC	FT	777.152	0	518.101	25.0235	4.20613	5.94928	2.69×10^-09	5.62×10^-07
TRINITY_DN4974_c0_g1	FTC	FT	2968.75	0	1979.17	14.6038	2.45578	5.94672	2.74×10^-09	5.70×10^-07
TRINITY_DN28981_c0_g1	FTC	FT	634.401	0	422.934	24.993	4.20615	5.942	2.82×10^-09	5.85×10^-07
TRINITY_DN14229_c1_g1	FTC	FT	630.791	0	420.527	24.9865	4.20616	5.94046	2.84×10^-09	5.88×10^-07
TRINITY_DN10001_c1_g1	FTC	FT	61.8818	4.93066	42.8981	3.65122	0.614726	5.9396	2.86×10^-09	5.90×10^-07
TRINITY_DN6418_c0_g1	FTC	FT	3.2243	63.8831	23.4439	-4.30372	0.725195	-5.93456	2.95×10^-09	6.07×10^-07
TRINITY_DN43908_c0_g3	FTC	FT	87.0023	0	58.0015	9.51344	1.60353	5.93282	2.98×10^-09	6.11×10^-07
TRINITY_DN1094_c0_g1	FTC	FT	565.84	2774.08	1301.92	-2.29249	0.386564	-5.93042	3.02×10^-09	6.19×10^-07
TRINITY_DN6899_c0_g2	FTC	FT	51.1891	639.11	247.163	-3.62934	0.612117	-5.92916	3.04×10^-09	6.22×10^-07
TRINITY_DN24899_c1_g1	FTC	FT	84.6497	0	56.4331	9.46589	1.59715	5.92675	3.09×10^-09	6.29×10^-07
TRINITY_DN3489_c1_g1	FTC	FT	605.006	0	403.337	24.9269	4.20616	5.92629	3.10×10^-09	6.29×10^-07
TRINITY_DN6470_c3_g1	FTC	FT	0	555.835	185.278	-11.2742	1.90353	-5.92276	3.17×10^-09	6.41×10^-07
TRINITY_DN12618_c2_g1	FTC	FT	111.903	0	74.6023	9.87415	1.66747	5.92162	3.19×10^-09	6.43×10^-07
TRINITY_DN2549_c2_g1	FTC	FT	47.3873	531.077	208.617	-3.50141	0.591319	-5.92135	3.19×10^-09	6.43×10^-07
TRINITY_DN78158_c0_g1	FTC	FT	593.177	0	395.451	24.8996	4.20616	5.91979	3.22×10^-09	6.47×10^-07
TRINITY_DN3519_c5_g1	FTC	FT	0	3658.92	1219.64	-13.9928	2.36482	-5.91706	3.28×10^-09	6.55×10^-07
TRINITY_DN18117_c1_g2	FTC	FT	14.443	122.558	50.4814	-3.09714	0.523443	-5.91687	3.28×10^-09	6.55×10^-07
TRINITY_DN78527_c0_g1	FTC	FT	5390.37	1403.63	4061.45	1.94108	0.328089	5.91632	3.29×10^-09	6.56×10^-07
TRINITY_DN22633_c0_g5	FTC	FT	584.882	0	389.922	24.8788	4.20616	5.91484	3.32×10^-09	6.58×10^-07
TRINITY_DN79356_c1_g1	FTC	FT	588.291	0	392.194	24.8787	4.20616	5.91482	3.32×10^-09	6.58×10^-07
TRINITY_DN14297_c0_g4	FTC	FT	41.4851	297.578	126.849	-2.85217	0.482387	-5.91261	3.37×10^-09	6.65×10^-07
TRINITY_DN84449_c1_g1	FTC	FT	578.972	0	385.981	24.8609	4.20617	5.91058	3.41×10^-09	6.72×10^-07
TRINITY_DN1834_c2_g1	FTC	FT	312.19	20.2857	214.889	3.93888	0.666581	5.90908	3.44×10^-09	6.76×10^-07
TRINITY_DN2048_c8_g1	FTC	FT	571.667	0	381.111	24.8467	4.20617	5.90721	3.48×10^-09	6.81×10^-07
TRINITY_DN20256_c0_g1	FTC	FT	593.786	0	395.857	24.8463	4.20616	5.90711	3.48×10^-09	6.81×10^-07
TRINITY_DN1813_c0_g1	FTC	FT	88.3792	312.647	163.135	-1.81812	0.307874	-5.9054	3.52×10^-09	6.84×10^-07
TRINITY_DN8680_c0_g2	FTC	FT	0	286.843	95.6143	-10.3197	1.74763	-5.905	3.53×10^-09	6.84×10^-07
TRINITY_DN31414_c0_g1	FTC	FT	75.7193	0	50.4795	9.31723	1.57794	5.90466	3.53×10^-09	6.84×10^-07
TRINITY_DN27376_c0_g1	FTC	FT	566.507	0	377.671	24.8356	4.20617	5.90457	3.54×10^-09	6.84×10^-07
TRINITY_DN11118_c0_g1	FTC	FT	274.037	29.2793	192.451	3.2316	0.54743	5.90321	3.56×10^-09	6.88×10^-07
TRINITY_DN2535_c0_g2	FTC	FT	2093.81	780.148	1655.92	1.42453	0.241488	5.89897	3.66×10^-09	7.04×10^-07
TRINITY_DN3428_c0_g2	FTC	FT	554.652	0	369.768	24.8059	4.20617	5.8975	3.69×10^-09	7.08×10^-07
TRINITY_DN15910_c4_g1	FTC	FT	58.9615	0	39.3077	8.95257	1.51924	5.89278	3.80×10^-09	7.27×10^-07
TRINITY_DN11659_c5_g1	FTC	FT	543.552	0	362.368	24.775	4.20618	5.89015	3.86×10^-09	7.37×10^-07
TRINITY_DN15086_c0_g1	FTC	FT	34.7924	183.201	84.2618	-2.40376	0.408291	-5.88738	3.92×10^-09	7.47×10^-07
TRINITY_DN16344_c1_g1	FTC	FT	0	354.118	118.039	-10.6237	1.80505	-5.88554	3.97×10^-09	7.54×10^-07
TRINITY_DN26384_c0_g1	FTC	FT	0	374.464	124.821	-10.7043	1.81905	-5.88458	3.99×10^-09	7.55×10^-07
TRINITY_DN1858_c2_g1	FTC	FT	718.428	0	478.952	24.75	4.20614	5.88425	4.00×10^-09	7.55×10^-07
TRINITY_DN7015_c0_g1	FTC	FT	1985.87	810.36	1594.03	1.29244	0.219658	5.88388	4.01×10^-09	7.55×10^-07
TRINITY_DN16954_c0_g1	FTC	FT	638.058	0	425.372	12.3855	2.10509	5.88357	4.02×10^-09	7.55×10^-07
TRINITY_DN1404_c0_g1	FTC	FT	521.058	114.491	385.536	2.18498	0.371435	5.88253	4.04×10^-09	7.58×10^-07
TRINITY_DN8503_c0_g1	FTC	FT	16.7424	141.98	58.4882	-3.08174	0.523917	-5.88212	4.05×10^-09	7.58×10^-07
TRINITY_DN3810_c2_g1	FTC	FT	922.673	229.149	691.498	2.00911	0.341649	5.88062	4.09×10^-09	7.63×10^-07
TRINITY_DN15713_c0_g1	FTC	FT	381.074	25.6629	262.604	3.89476	0.662396	5.87982	4.11×10^-09	7.64×10^-07
TRINITY_DN756_c0_g1	FTC	FT	525.541	17.2942	356.125	4.92317	0.837343	5.87952	4.11×10^-09	7.64×10^-07
TRINITY_DN4540_c0_g2	FTC	FT	26.2315	307.624	120.029	-3.53693	0.601651	-5.87871	4.13×10^-09	7.65×10^-07
TRINITY_DN1467_c0_g1	FTC	FT	479.829	1038.03	665.897	-1.11511	0.189694	-5.87846	4.14×10^-09	7.65×10^-07
TRINITY_DN1921_c9_g1	FTC	FT	86.7166	0	57.8111	9.50899	1.61834	5.87576	4.21×10^-09	7.76×10^-07
TRINITY_DN71262_c2_g1	FTC	FT	258.938	1157.59	558.487	-2.16217	0.368125	-5.87347	4.27×10^-09	7.82×10^-07
TRINITY_DN81919_c0_g3	FTC	FT	515.525	0	343.683	24.7039	4.20618	5.87324	4.27×10^-09	7.82×10^-07
TRINITY_DN1768_c10_g1	FTC	FT	4.70181	184.324	64.5758	-5.29366	0.901344	-5.87308	4.28×10^-09	7.82×10^-07
TRINITY_DN7135_c1_g1	FTC	FT	515.257	0	343.505	24.7021	4.20618	5.87281	4.28×10^-09	7.82×10^-07
TRINITY_DN2207_c6_g1	FTC	FT	0	370.647	123.549	-10.6896	1.82092	-5.87043	4.35×10^-09	7.91×10^-07
TRINITY_DN26136_c0_g2	FTC	FT	511.341	0	340.894	24.6869	4.20618	5.86919	4.38×10^-09	7.91×10^-07
TRINITY_DN3201_c0_g2	FTC	FT	80.6576	476.852	212.722	-2.55869	0.435971	-5.86895	4.39×10^-09	7.91×10^-07
TRINITY_DN35045_c1_g1	FTC	FT	0	379.587	126.529	-10.7239	1.82732	-5.86865	4.39×10^-09	7.91×10^-07
TRINITY_DN8962_c1_g1	FTC	FT	330.293	38.6204	233.069	3.09897	0.528069	5.8685	4.40×10^-09	7.91×10^-07
TRINITY_DN27231_c1_g2	FTC	FT	507.519	0	338.346	24.6816	4.20619	5.86794	4.41×10^-09	7.91×10^-07
TRINITY_DN1007_c3_g1	FTC	FT	77.7142	0	51.8095	9.35325	1.59397	5.86791	4.41×10^-09	7.91×10^-07
TRINITY_DN124528_c1_g1	FTC	FT	28.4834	134.27	63.7455	-2.25174	0.383887	-5.86563	4.47×10^-09	8.00×10^-07
TRINITY_DN87736_c0_g1	FTC	FT	1.86117	388.436	130.72	-7.55533	1.28861	-5.86317	4.54×10^-09	8.10×10^-07
TRINITY_DN3881_c5_g1	FTC	FT	498.937	0	332.625	24.6585	4.20619	5.86243	4.56×10^-09	8.12×10^-07
TRINITY_DN23751_c0_g1	FTC	FT	498.016	0	332.011	24.654	4.20619	5.86136	4.59×10^-09	8.15×10^-07
TRINITY_DN6719_c0_g1	FTC	FT	12060.5	1321.51	8480.81	3.19005	0.544759	5.8559	4.74×10^-09	8.41×10^-07
TRINITY_DN2523_c0_g1	FTC	FT	64.7664	896.823	342.119	-3.78063	0.645688	-5.8552	4.76×10^-09	8.42×10^-07
TRINITY_DN455_c0_g1	FTC	FT	150.145	1317.94	539.409	-3.13265	0.535101	-5.85431	4.79×10^-09	8.45×10^-07
TRINITY_DN114988_c1_g1	FTC	FT	14.7863	145.392	58.3217	-3.28179	0.560635	-5.85371	4.81×10^-09	8.46×10^-07
TRINITY_DN110792_c0_g2	FTC	FT	484.052	0	322.701	24.6142	4.20619	5.8519	4.86×10^-09	8.52×10^-07
TRINITY_DN38860_c0_g3	FTC	FT	142.868	24.3332	103.356	2.55332	0.436339	5.85169	4.87×10^-09	8.52×10^-07
TRINITY_DN8996_c0_g2	FTC	FT	1.10106	78.7643	26.9888	-6.08714	1.04104	-5.84718	5.00×10^-09	8.73×10^-07
TRINITY_DN37603_c0_g1	FTC	FT	0	341.95	113.983	-10.5733	1.80867	-5.84589	5.04×10^-09	8.77×10^-07
TRINITY_DN1667_c1_g1	FTC	FT	474.507	0	316.338	24.5883	4.2062	5.84573	5.04×10^-09	8.77×10^-07
TRINITY_DN2650_c0_g1	FTC	FT	64.7612	372.609	167.377	-2.51385	0.430076	-5.84515	5.06×10^-09	8.78×10^-07
TRINITY_DN280_c1_g1	FTC	FT	60.157	0.914101	40.4094	5.98082	1.02339	5.84411	5.09×10^-09	8.81×10^-07
TRINITY_DN1956_c1_g1	FTC	FT	468.669	0	312.446	24.571	4.2062	5.84162	5.17×10^-09	8.92×10^-07
TRINITY_DN2655_c0_g1	FTC	FT	41.3575	324.703	135.806	-2.97999	0.510225	-5.84054	5.20×10^-09	8.96×10^-07
TRINITY_DN69_c1_g1	FTC	FT	585.691	0	390.461	24.5597	4.20616	5.83897	5.25×10^-09	9.02×10^-07
TRINITY_DN3672_c2_g3	FTC	FT	93.8851	0.609401	62.7932	7.20277	1.23443	5.83488	5.38×10^-09	9.21×10^-07
TRINITY_DN1152_c9_g2	FTC	FT	459.092	0	306.062	24.5422	4.2062	5.83478	5.39×10^-09	9.21×10^-07
TRINITY_DN97805_c2_g1	FTC	FT	457.34	0	304.894	24.5366	4.2062	5.83343	5.43×10^-09	9.25×10^-07
TRINITY_DN60_c2_g2	FTC	FT	1490.98	197.9	1059.95	2.91277	0.499336	5.83328	5.43×10^-09	9.25×10^-07
TRINITY_DN8458_c0_g1	FTC	FT	9.22686	108.013	42.1555	-3.55448	0.609379	-5.83295	5.45×10^-09	9.25×10^-07
TRINITY_DN3619_c1_g3	FTC	FT	455.316	0	303.544	24.5309	4.2062	5.83207	5.47×10^-09	9.28×10^-07
TRINITY_DN97308_c5_g1	FTC	FT	0	339.671	113.224	-10.5636	1.81321	-5.82589	5.68×10^-09	9.60×10^-07
TRINITY_DN30400_c0_g3	FTC	FT	444.232	0	296.155	24.4934	4.20621	5.82315	5.77×10^-09	9.74×10^-07
TRINITY_DN475_c1_g2	FTC	FT	24.8123	112.349	53.9914	-2.17275	0.373289	-5.82057	5.86×10^-09	9.87×10^-07
TRINITY_DN30071_c5_g1	FTC	FT	0	293.897	97.9655	-10.3548	1.77918	-5.81998	5.89×10^-09	9.87×10^-07
TRINITY_DN4552_c1_g1	FTC	FT	440.411	0	293.608	24.4796	4.20621	5.81987	5.89×10^-09	9.87×10^-07
TRINITY_DN3522_c0_g2	FTC	FT	435.541	0	290.361	24.4678	4.20621	5.81706	5.99×10^-09	1.00×10^-06
TRINITY_DN33841_c0_g1	FTC	FT	433.634	0	289.089	24.4588	4.20621	5.81492	6.07×10^-09	1.01×10^-06
TRINITY_DN1140_c29_g1	FTC	FT	434.198	0	289.465	24.4586	4.20621	5.81488	6.07×10^-09	1.01×10^-06
TRINITY_DN24850_c0_g1	FTC	FT	10.3151	136.845	52.4919	-3.6877	0.63432	-5.81362	6.11×10^-09	1.01×10^-06
TRINITY_DN7664_c0_g1	FTC	FT	48.3645	1.94825	32.8924	4.64586	0.79935	5.81205	6.17×10^-09	1.02×10^-06
TRINITY_DN98284_c3_g2	FTC	FT	0	271.641	90.5472	-10.2412	1.7621	-5.81193	6.18×10^-09	1.02×10^-06
TRINITY_DN10918_c0_g1	FTC	FT	424.936	0	283.291	24.4316	4.20622	5.80846	6.31×10^-09	1.04×10^-06
TRINITY_DN93376_c0_g1	FTC	FT	423.33	0	282.22	24.4281	4.20622	5.80762	6.34×10^-09	1.04×10^-06
TRINITY_DN22459_c0_g3	FTC	FT	423.007	0	282.005	24.428	4.20622	5.8076	6.34×10^-09	1.04×10^-06
TRINITY_DN47362_c0_g2	FTC	FT	420.913	0	280.609	24.4278	4.20622	5.80754	6.34×10^-09	1.04×10^-06
TRINITY_DN2709_c16_g1	FTC	FT	419.188	0	279.459	24.4152	4.20622	5.80455	6.45×10^-09	1.05×10^-06
TRINITY_DN2280_c0_g1	FTC	FT	77.8946	444.697	200.162	-2.51965	0.434119	-5.80407	6.47×10^-09	1.06×10^-06
TRINITY_DN10173_c1_g2	FTC	FT	416.456	0	277.637	24.4056	4.20622	5.80225	6.54×10^-09	1.06×10^-06
TRINITY_DN5121_c2_g1	FTC	FT	416.123	0	277.416	24.4051	4.20622	5.80214	6.55×10^-09	1.06×10^-06
TRINITY_DN2136_c1_g1	FTC	FT	747.379	0	498.253	24.4042	4.20614	5.80204	6.55×10^-09	1.06×10^-06
TRINITY_DN3320_c0_g1	FTC	FT	207.374	1.5235	138.757	7.05515	1.21599	5.80198	6.55×10^-09	1.06×10^-06
TRINITY_DN37982_c0_g1	FTC	FT	416.322	0	277.548	24.4042	4.20622	5.80193	6.56×10^-09	1.06×10^-06
TRINITY_DN8120_c3_g1	FTC	FT	414.35	0	276.233	24.3992	4.20622	5.80073	6.60×10^-09	1.06×10^-06
TRINITY_DN30907_c0_g1	FTC	FT	0	437.485	145.828	-10.9287	1.88521	-5.79705	6.75×10^-09	1.08×10^-06
TRINITY_DN699_c5_g1	FTC	FT	68.002	8.82717	48.277	2.94257	0.507612	5.79689	6.76×10^-09	1.08×10^-06
TRINITY_DN4079_c1_g2	FTC	FT	127.513	401.965	218.997	-1.65258	0.285146	-5.79555	6.81×10^-09	1.09×10^-06
TRINITY_DN5347_c1_g1	FTC	FT	10.2959	108.342	42.9779	-3.42936	0.591746	-5.79533	6.82×10^-09	1.09×10^-06
TRINITY_DN33137_c2_g3	FTC	FT	456.393	0	304.262	24.3726	4.2062	5.79443	6.86×10^-09	1.09×10^-06
TRINITY_DN9879_c1_g2	FTC	FT	237.82	0	158.546	10.9616	1.89191	5.79392	6.88×10^-09	1.09×10^-06
TRINITY_DN22459_c2_g2	FTC	FT	406.031	0	270.687	24.369	4.20622	5.79356	6.89×10^-09	1.09×10^-06
TRINITY_DN39007_c0_g1	FTC	FT	0	371.915	123.972	-10.6945	1.84647	-5.79187	6.96×10^-09	1.10×10^-06
TRINITY_DN1538_c0_g1	FTC	FT	41.737	363.843	149.106	-3.10712	0.536494	-5.79153	6.97×10^-09	1.10×10^-06
TRINITY_DN6606_c0_g1	FTC	FT	12.9122	157.024	60.9494	-3.57291	0.616928	-5.79145	6.98×10^-09	1.10×10^-06
TRINITY_DN382_c2_g1	FTC	FT	665.002	0.689436	443.564	9.95261	1.71855	5.79127	6.99×10^-09	1.10×10^-06
TRINITY_DN27902_c6_g1	FTC	FT	477.099	0	318.066	24.3547	4.2062	5.79019	7.03×10^-09	1.10×10^-06
TRINITY_DN7395_c1_g2	FTC	FT	423.692	0	282.461	24.3454	4.20622	5.78795	7.13×10^-09	1.12×10^-06
TRINITY_DN17759_c4_g1	FTC	FT	395.58	0	263.72	24.3314	4.20623	5.78462	7.27×10^-09	1.13×10^-06
TRINITY_DN13551_c0_g1	FTC	FT	267.355	89.3951	208.035	1.57973	0.273144	5.7835	7.32×10^-09	1.14×10^-06
TRINITY_DN19600_c0_g1	FTC	FT	229.012	77.2653	178.43	1.56566	0.27082	5.78118	7.42×10^-09	1.15×10^-06
TRINITY_DN21854_c1_g2	FTC	FT	4.47252	92.2357	33.7269	-4.3745	0.756833	-5.78001	7.47×10^-09	1.16×10^-06
TRINITY_DN2678_c3_g1	FTC	FT	6.68812	126.861	46.7458	-4.18766	0.724696	-5.7785	7.54×10^-09	1.17×10^-06
TRINITY_DN12934_c0_g1	FTC	FT	480.807	87.0958	349.57	2.46564	0.426755	5.77764	7.58×10^-09	1.17×10^-06
TRINITY_DN62857_c0_g2	FTC	FT	509.07	0	339.38	24.2915	4.20618	5.77519	7.69×10^-09	1.19×10^-06
TRINITY_DN77770_c0_g1	FTC	FT	382.668	0	255.112	24.2881	4.20624	5.77431	7.73×10^-09	1.19×10^-06
TRINITY_DN9910_c1_g1	FTC	FT	382.668	0	255.112	24.2881	4.20624	5.77431	7.73×10^-09	1.19×10^-06
TRINITY_DN10496_c1_g5	FTC	FT	107.123	0	71.4155	9.81368	1.69958	5.77417	7.73×10^-09	1.19×10^-06
TRINITY_DN27516_c1_g1	FTC	FT	3066.82	673.127	2268.92	2.18761	0.379	5.77204	7.83×10^-09	1.20×10^-06
TRINITY_DN5737_c1_g1	FTC	FT	943.041	424.276	770.119	1.15065	0.199376	5.77127	7.87×10^-09	1.20×10^-06
TRINITY_DN9270_c2_g1	FTC	FT	379.206	0	252.804	24.2746	4.20624	5.7711	7.88×10^-09	1.20×10^-06
TRINITY_DN40439_c1_g2	FTC	FT	9.4051	89.9244	36.2449	-3.27595	0.567726	-5.7703	7.91×10^-09	1.20×10^-06
TRINITY_DN5424_c13_g1	FTC	FT	0	264.803	88.2675	-10.2044	1.76854	-5.76994	7.93×10^-09	1.20×10^-06
TRINITY_DN74186_c0_g3	FTC	FT	0	264.803	88.2675	-10.2044	1.76854	-5.76994	7.93×10^-09	1.20×10^-06
TRINITY_DN7681_c0_g1	FTC	FT	0.868759	381.946	127.895	-8.76243	1.51884	-5.76915	7.97×10^-09	1.20×10^-06
TRINITY_DN5184_c2_g1	FTC	FT	0.40428	120.826	40.5447	-8.35113	1.4477	-5.76855	8.00×10^-09	1.20×10^-06
TRINITY_DN9207_c0_g3	FTC	FT	396.977	0	264.651	24.2631	4.20623	5.76838	8.00×10^-09	1.20×10^-06
TRINITY_DN25291_c0_g1	FTC	FT	535.932	0	357.288	24.2602	4.20618	5.76776	8.03×10^-09	1.20×10^-06
TRINITY_DN18270_c1_g2	FTC	FT	376.437	0	250.958	24.2603	4.20624	5.76769	8.04×10^-09	1.20×10^-06
TRINITY_DN130702_c0_g3	FTC	FT	29.6634	247.798	102.375	-3.04689	0.528587	-5.76421	8.20×10^-09	1.23×10^-06
TRINITY_DN19106_c3_g1	FTC	FT	372.184	0	248.123	24.2434	4.20624	5.76368	8.23×10^-09	1.23×10^-06
TRINITY_DN1213_c21_g2	FTC	FT	367.912	0	245.275	24.2335	4.20624	5.76132	8.35×10^-09	1.24×10^-06
TRINITY_DN17347_c4_g1	FTC	FT	367.933	0	245.288	24.2326	4.20624	5.76111	8.36×10^-09	1.24×10^-06
TRINITY_DN1286_c5_g1	FTC	FT	80.1728	7.63295	55.9928	3.39119	0.588707	5.7604	8.39×10^-09	1.24×10^-06
TRINITY_DN32005_c2_g1	FTC	FT	366.758	0	244.505	24.2285	4.20624	5.76013	8.40×10^-09	1.24×10^-06
TRINITY_DN29558_c0_g1	FTC	FT	29.0161	168.384	75.4721	-2.51373	0.436464	-5.7593	8.45×10^-09	1.25×10^-06
TRINITY_DN89451_c6_g1	FTC	FT	366.25	0	244.167	24.2228	4.20624	5.75876	8.47×10^-09	1.25×10^-06
TRINITY_DN2171_c0_g1	FTC	FT	424.557	40.193	296.436	3.39907	0.590312	5.75808	8.51×10^-09	1.25×10^-06
TRINITY_DN13463_c3_g1	FTC	FT	364.182	0	242.788	24.2183	4.20625	5.75769	8.53×10^-09	1.25×10^-06
TRINITY_DN18091_c1_g1	FTC	FT	362.878	0	241.918	24.2142	4.20625	5.75673	8.58×10^-09	1.26×10^-06
TRINITY_DN7566_c0_g1	FTC	FT	75.703	0	50.4687	9.31249	1.61784	5.75614	8.61×10^-09	1.26×10^-06
TRINITY_DN3257_c2_g1	FTC	FT	55373.8	1262.32	37336.6	5.45504	0.947793	5.75552	8.64×10^-09	1.26×10^-06
TRINITY_DN16805_c0_g3	FTC	FT	58.528	4.16119	40.4057	3.80063	0.66066	5.75278	8.78×10^-09	1.28×10^-06
TRINITY_DN278_c5_g1	FTC	FT	166.423	0	110.949	10.4451	1.81582	5.75225	8.81×10^-09	1.28×10^-06
TRINITY_DN107499_c0_g1	FTC	FT	357.872	0	238.581	24.1905	4.20625	5.75107	8.87×10^-09	1.28×10^-06
TRINITY_DN37332_c2_g1	FTC	FT	579.877	0	386.585	24.1894	4.20617	5.75093	8.88×10^-09	1.28×10^-06
TRINITY_DN4114_c0_g2	FTC	FT	0	490.586	163.529	-11.094	1.92914	-5.75076	8.88×10^-09	1.28×10^-06
TRINITY_DN6899_c3_g1	FTC	FT	356.252	0	237.501	24.1885	4.20625	5.7506	8.89×10^-09	1.28×10^-06
TRINITY_DN15986_c0_g2	FTC	FT	11.3423	136.369	53.0178	-3.58165	0.622839	-5.75052	8.90×10^-09	1.28×10^-06
TRINITY_DN5810_c0_g1	FTC	FT	0	295.289	98.4296	-10.3616	1.8023	-5.74909	8.97×10^-09	1.29×10^-06
TRINITY_DN456_c4_g1	FTC	FT	352.405	0	234.937	24.1737	4.20625	5.74708	9.08×10^-09	1.30×10^-06
TRINITY_DN46123_c0_g7	FTC	FT	77.8272	0	51.8848	9.34879	1.62678	5.74679	9.10×10^-09	1.30×10^-06
TRINITY_DN23209_c0_g2	FTC	FT	351.937	0	234.625	24.1717	4.20625	5.74661	9.10×10^-09	1.30×10^-06
TRINITY_DN123645_c0_g1	FTC	FT	686.023	0	457.349	24.1686	4.20615	5.74602	9.14×10^-09	1.30×10^-06
TRINITY_DN15033_c2_g1	FTC	FT	352.01	0	234.673	24.168	4.20625	5.74574	9.15×10^-09	1.30×10^-06
TRINITY_DN30359_c5_g1	FTC	FT	352.01	0	234.673	24.168	4.20625	5.74574	9.15×10^-09	1.30×10^-06
TRINITY_DN7931_c3_g1	FTC	FT	352.01	0	234.673	24.168	4.20625	5.74574	9.15×10^-09	1.30×10^-06
TRINITY_DN36226_c0_g2	FTC	FT	0	260.906	86.9687	-10.183	1.77248	-5.74505	9.19×10^-09	1.30×10^-06
TRINITY_DN40161_c1_g1	FTC	FT	348.756	0	232.504	24.1589	4.20626	5.74357	9.27×10^-09	1.31×10^-06
TRINITY_DN13639_c0_g1	FTC	FT	361.144	0	240.763	24.1547	4.20625	5.74257	9.33×10^-09	1.31×10^-06
TRINITY_DN14365_c0_g3	FTC	FT	347.223	0	231.482	24.153	4.20626	5.74217	9.35×10^-09	1.31×10^-06
TRINITY_DN6271_c0_g2	FTC	FT	347.135	0	231.423	24.1522	4.20626	5.74196	9.36×10^-09	1.31×10^-06
TRINITY_DN3759_c0_g1	FTC	FT	346.986	0	231.324	24.1479	4.20626	5.74096	9.41×10^-09	1.32×10^-06
TRINITY_DN593_c7_g1	FTC	FT	344.699	0	229.799	24.1389	4.20626	5.7388	9.53×10^-09	1.33×10^-06
TRINITY_DN7191_c0_g1	FTC	FT	56.7433	9.74127	41.076	2.55236	0.444922	5.73665	9.66×10^-09	1.35×10^-06
TRINITY_DN2998_c1_g1	FTC	FT	341.096	0	227.398	24.1239	4.20626	5.73524	9.74×10^-09	1.36×10^-06
TRINITY_DN1213_c3_g2	FTC	FT	458.635	204.705	373.991	1.1633	0.202863	5.73439	9.79×10^-09	1.36×10^-06
TRINITY_DN8693_c0_g1	FTC	FT	68.0526	734.579	290.228	-3.43443	0.598955	-5.73404	9.81×10^-09	1.36×10^-06
TRINITY_DN93049_c0_g2	FTC	FT	339.663	0	226.442	24.1169	4.20626	5.73358	9.83×10^-09	1.36×10^-06
TRINITY_DN2938_c0_g3	FTC	FT	337.734	0	225.156	24.1137	4.20626	5.7328	9.88×10^-09	1.36×10^-06
TRINITY_DN1857_c2_g1	FTC	FT	226.393	0	150.929	10.8901	1.89966	5.73265	9.89×10^-09	1.36×10^-06
TRINITY_DN37565_c1_g2	FTC	FT	337.213	0	224.809	24.1123	4.20626	5.73247	9.90×10^-09	1.36×10^-06
TRINITY_DN41645_c0_g1	FTC	FT	337.213	0	224.809	24.1123	4.20626	5.73247	9.90×10^-09	1.36×10^-06
TRINITY_DN1154_c3_g1	FTC	FT	337.021	0	224.681	24.1113	4.20626	5.73223	9.91×10^-09	1.36×10^-06
TRINITY_DN3507_c2_g1	FTC	FT	339.939	0	226.626	24.1093	4.20626	5.73177	9.94×10^-09	1.36×10^-06
TRINITY_DN9806_c1_g1	FTC	FT	335.796	0	223.864	24.1054	4.20626	5.73083	9.99×10^-09	1.37×10^-06
TRINITY_DN874_c5_g1	FTC	FT	0	410.948	136.983	-10.8384	1.89244	-5.72721	1.02×10^-08	1.39×10^-06
TRINITY_DN1396_c4_g1	FTC	FT	3.79128	107.302	38.2949	-4.87175	0.850664	-5.727	1.02×10^-08	1.39×10^-06
TRINITY_DN6236_c0_g1	FTC	FT	1775.82	11119.8	4890.5	-2.64664	0.462155	-5.72675	1.02×10^-08	1.39×10^-06
TRINITY_DN72038_c0_g1	FTC	FT	331.721	0	221.148	24.0882	4.20627	5.72674	1.02×10^-08	1.39×10^-06
TRINITY_DN22087_c0_g1	FTC	FT	331.289	0	220.859	24.085	4.20627	5.72598	1.03×10^-08	1.39×10^-06
TRINITY_DN3550_c5_g1	FTC	FT	455.784	0	303.856	24.0729	4.2062	5.7232	1.05×10^-08	1.41×10^-06
TRINITY_DN32373_c0_g1	FTC	FT	328.776	0	219.184	24.0732	4.20627	5.72318	1.05×10^-08	1.41×10^-06
TRINITY_DN8070_c0_g2	FTC	FT	0	255.544	85.1815	-10.1531	1.77413	-5.72285	1.05×10^-08	1.41×10^-06
TRINITY_DN3948_c9_g1	FTC	FT	620.722	0	413.815	24.0697	4.20616	5.7225	1.05×10^-08	1.41×10^-06
TRINITY_DN5525_c7_g1	FTC	FT	77.2565	0	51.5043	9.34358	1.63301	5.72169	1.05×10^-08	1.41×10^-06
TRINITY_DN2436_c2_g1	FTC	FT	326.517	0	217.678	24.0668	4.20627	5.72165	1.05×10^-08	1.41×10^-06
TRINITY_DN50646_c0_g1	FTC	FT	103.987	0	69.3247	9.76775	1.70745	5.72067	1.06×10^-08	1.42×10^-06
TRINITY_DN52964_c0_g4	FTC	FT	325.267	0	216.845	24.0615	4.20627	5.72039	1.06×10^-08	1.42×10^-06
TRINITY_DN4092_c7_g1	FTC	FT	320.051	0	213.367	24.0393	4.20628	5.7151	1.10×10^-08	1.46×10^-06
TRINITY_DN64288_c0_g1	FTC	FT	0	256.015	85.3385	-10.1557	1.77735	-5.71396	1.10×10^-08	1.47×10^-06
TRINITY_DN2480_c1_g3	FTC	FT	559.36	0	372.907	24.0329	4.20617	5.71373	1.11×10^-08	1.47×10^-06
TRINITY_DN69496_c1_g1	FTC	FT	318.784	0	212.523	24.0306	4.20628	5.71304	1.11×10^-08	1.47×10^-06
TRINITY_DN25711_c0_g1	FTC	FT	317.566	0	211.711	24.0286	4.20628	5.71256	1.11×10^-08	1.47×10^-06
TRINITY_DN4228_c4_g1	FTC	FT	318.143	0	212.095	24.0272	4.20628	5.71222	1.12×10^-08	1.47×10^-06
TRINITY_DN17504_c1_g1	FTC	FT	389.782	0	259.854	24.0267	4.20623	5.71216	1.12×10^-08	1.47×10^-06
TRINITY_DN7357_c1_g3	FTC	FT	319.487	0	212.991	24.024	4.20628	5.71147	1.12×10^-08	1.47×10^-06
TRINITY_DN8506_c0_g1	FTC	FT	7311.72	805.013	5142.82	3.18323	0.55738	5.71106	1.12×10^-08	1.47×10^-06
TRINITY_DN248_c0_g3	FTC	FT	95.7982	0	63.8655	9.64921	1.68973	5.71051	1.13×10^-08	1.47×10^-06
TRINITY_DN5759_c10_g1	FTC	FT	336.767	0	224.511	24.0194	4.20626	5.71039	1.13×10^-08	1.47×10^-06
TRINITY_DN8538_c2_g5	FTC	FT	920.799	0	613.866	24.0184	4.20612	5.71034	1.13×10^-08	1.47×10^-06
TRINITY_DN30558_c3_g2	FTC	FT	314.289	0	209.526	24.0137	4.20628	5.70901	1.14×10^-08	1.48×10^-06
TRINITY_DN56659_c0_g3	FTC	FT	328.73	0	219.153	24.0094	4.20627	5.70801	1.14×10^-08	1.49×10^-06
TRINITY_DN36465_c0_g2	FTC	FT	314.578	0	209.719	24.0094	4.20628	5.70799	1.14×10^-08	1.49×10^-06
TRINITY_DN7791_c0_g1	FTC	FT	2.36169	58.9216	21.215	-4.64284	0.813655	-5.70615	1.16×10^-08	1.50×10^-06
TRINITY_DN130194_c1_g1	FTC	FT	311.388	0	207.592	24.0005	4.20628	5.70588	1.16×10^-08	1.50×10^-06
TRINITY_DN1447_c5_g1	FTC	FT	10.4676	473.453	164.796	-5.45378	0.955969	-5.70498	1.16×10^-08	1.50×10^-06
TRINITY_DN18766_c3_g2	FTC	FT	311.53	0	207.687	23.9959	4.20628	5.70478	1.16×10^-08	1.50×10^-06
TRINITY_DN88846_c0_g2	FTC	FT	310.052	0	206.701	23.995	4.20628	5.70457	1.17×10^-08	1.50×10^-06
TRINITY_DN90850_c9_g1	FTC	FT	310.202	0	206.801	23.9949	4.20628	5.70454	1.17×10^-08	1.50×10^-06
TRINITY_DN4051_c1_g3	FTC	FT	310.229	0	206.819	23.994	4.20628	5.70433	1.17×10^-08	1.50×10^-06
TRINITY_DN2191_c4_g2	FTC	FT	310.239	0	206.826	23.9911	4.20628	5.70364	1.17×10^-08	1.50×10^-06
TRINITY_DN31571_c5_g1	FTC	FT	614.832	0	409.888	23.9881	4.20616	5.7031	1.18×10^-08	1.51×10^-06
TRINITY_DN13397_c2_g1	FTC	FT	308.229	0	205.486	23.9868	4.20628	5.7026	1.18×10^-08	1.51×10^-06
TRINITY_DN7031_c1_g2	FTC	FT	307.546	0	205.03	23.9831	4.20629	5.70172	1.19×10^-08	1.51×10^-06
TRINITY_DN1345_c11_g1	FTC	FT	86.2595	10.8154	61.1115	2.99917	0.526023	5.70159	1.19×10^-08	1.51×10^-06
TRINITY_DN19281_c0_g1	FTC	FT	103.978	0	69.319	9.76876	1.71338	5.70146	1.19×10^-08	1.51×10^-06
TRINITY_DN114170_c5_g1	FTC	FT	0	329.58	109.86	-10.5201	1.84538	-5.70081	1.19×10^-08	1.51×10^-06
TRINITY_DN7695_c6_g1	FTC	FT	307.281	0	204.854	23.9788	4.20629	5.70071	1.19×10^-08	1.51×10^-06
TRINITY_DN2202_c0_g4	FTC	FT	49.1329	410.971	169.746	-3.06723	0.538208	-5.69898	1.21×10^-08	1.52×10^-06
TRINITY_DN48477_c6_g1	FTC	FT	427.505	0	285.004	23.9677	4.20621	5.69817	1.21×10^-08	1.53×10^-06
TRINITY_DN4582_c5_g1	FTC	FT	302.636	0	201.757	23.966	4.20629	5.69766	1.21×10^-08	1.53×10^-06
TRINITY_DN34372_c0_g1	FTC	FT	303.052	0	202.035	23.9575	4.20629	5.69564	1.23×10^-08	1.54×10^-06
TRINITY_DN11508_c0_g2	FTC	FT	301.76	0	201.173	23.9571	4.20629	5.69554	1.23×10^-08	1.54×10^-06
TRINITY_DN9594_c4_g1	FTC	FT	301.774	0	201.183	23.9569	4.20629	5.69548	1.23×10^-08	1.54×10^-06
TRINITY_DN1968_c2_g2	FTC	FT	301.178	0	200.785	23.9538	4.20629	5.69475	1.24×10^-08	1.55×10^-06
TRINITY_DN95014_c0_g1	FTC	FT	357.505	0	238.337	23.9523	4.20625	5.69445	1.24×10^-08	1.55×10^-06
TRINITY_DN26370_c6_g1	FTC	FT	300.676	0	200.45	23.9483	4.20629	5.69344	1.25×10^-08	1.55×10^-06
TRINITY_DN32133_c0_g1	FTC	FT	7.57135	72.1254	29.0894	-3.24348	0.569717	-5.69314	1.25×10^-08	1.55×10^-06
TRINITY_DN15163_c0_g1	FTC	FT	313.318	0	208.878	23.9458	4.20628	5.69286	1.25×10^-08	1.55×10^-06
TRINITY_DN81217_c1_g1	FTC	FT	299.249	0	199.499	23.9448	4.20629	5.69261	1.25×10^-08	1.55×10^-06
TRINITY_DN2648_c2_g1	FTC	FT	0	271.142	90.3808	-10.2386	1.79864	-5.69238	1.25×10^-08	1.55×10^-06
TRINITY_DN5926_c5_g1	FTC	FT	298.164	0	198.776	23.934	4.20629	5.69004	1.27×10^-08	1.57×10^-06
TRINITY_DN5023_c8_g1	FTC	FT	296.62	0	197.746	23.9327	4.20629	5.68974	1.27×10^-08	1.57×10^-06
TRINITY_DN29492_c0_g1	FTC	FT	296.606	0	197.737	23.9324	4.20629	5.68966	1.27×10^-08	1.57×10^-06
TRINITY_DN6657_c1_g2	FTC	FT	184.841	0	123.227	10.5996	1.86344	5.68817	1.28×10^-08	1.58×10^-06
TRINITY_DN1988_c9_g1	FTC	FT	295.184	0	196.789	23.9243	4.2063	5.68774	1.29×10^-08	1.58×10^-06
TRINITY_DN20025_c0_g2	FTC	FT	294.788	0	196.525	23.9242	4.2063	5.6877	1.29×10^-08	1.58×10^-06
TRINITY_DN3672_c2_g2	FTC	FT	113.213	0	75.4755	9.89232	1.73948	5.68694	1.29×10^-08	1.58×10^-06
TRINITY_DN65771_c1_g1	FTC	FT	313.332	0	208.888	23.9188	4.20628	5.68646	1.30×10^-08	1.58×10^-06
TRINITY_DN44310_c0_g4	FTC	FT	72.106	0	48.0707	9.23852	1.62467	5.68638	1.30×10^-08	1.58×10^-06
TRINITY_DN14316_c7_g1	FTC	FT	293.566	0	195.71	23.9185	4.2063	5.68635	1.30×10^-08	1.58×10^-06
TRINITY_DN39291_c0_g1	FTC	FT	58.1069	0	38.7379	8.92433	1.56982	5.68492	1.31×10^-08	1.59×10^-06
TRINITY_DN729_c0_g4	FTC	FT	8.79227	104.646	40.7434	-3.63187	0.638899	-5.68458	1.31×10^-08	1.59×10^-06
TRINITY_DN2450_c2_g1	FTC	FT	292.04	0	194.694	23.91	4.2063	5.68433	1.31×10^-08	1.59×10^-06
TRINITY_DN45242_c0_g1	FTC	FT	79.6407	0.689436	53.3236	6.92685	1.21866	5.684	1.32×10^-08	1.59×10^-06
TRINITY_DN963_c4_g1	FTC	FT	0	251.51	83.8365	-10.1301	1.78267	-5.68256	1.33×10^-08	1.60×10^-06
TRINITY_DN16004_c2_g1	FTC	FT	290.609	0	193.739	23.8999	4.2063	5.68193	1.33×10^-08	1.60×10^-06
TRINITY_DN8570_c0_g1	FTC	FT	3.20995	220.196	75.5387	-5.99772	1.05559	-5.68187	1.33×10^-08	1.60×10^-06
TRINITY_DN15896_c1_g1	FTC	FT	0.458334	203.437	68.1179	-8.44594	1.4865	-5.68177	1.33×10^-08	1.60×10^-06
TRINITY_DN27466_c0_g1	FTC	FT	348.368	0	232.245	23.8918	4.20626	5.68006	1.35×10^-08	1.61×10^-06
TRINITY_DN297_c11_g1	FTC	FT	294.515	0	196.343	23.8918	4.2063	5.68	1.35×10^-08	1.61×10^-06
TRINITY_DN53484_c6_g1	FTC	FT	302.235	0	201.49	23.89	4.20629	5.67959	1.35×10^-08	1.61×10^-06
TRINITY_DN26805_c0_g1	FTC	FT	290.261	0	193.507	23.8896	4.2063	5.67948	1.35×10^-08	1.61×10^-06
TRINITY_DN15989_c4_g1	FTC	FT	288.665	0	192.443	23.8887	4.2063	5.67927	1.35×10^-08	1.61×10^-06
TRINITY_DN6810_c6_g1	FTC	FT	292.331	0	194.887	23.8871	4.2063	5.67889	1.36×10^-08	1.61×10^-06
TRINITY_DN33439_c2_g1	FTC	FT	288.556	0	192.371	23.8834	4.2063	5.67802	1.36×10^-08	1.62×10^-06
TRINITY_DN45703_c0_g1	FTC	FT	287.262	0	191.508	23.8824	4.2063	5.67776	1.36×10^-08	1.62×10^-06
TRINITY_DN73524_c0_g1	FTC	FT	100.648	13.7824	71.6929	2.86961	0.505429	5.67758	1.37×10^-08	1.62×10^-06
TRINITY_DN27010_c7_g1	FTC	FT	386.609	0	257.74	23.8776	4.20623	5.67672	1.37×10^-08	1.62×10^-06
TRINITY_DN6697_c1_g1	FTC	FT	0	254.283	84.7609	-10.1459	1.78734	-5.67655	1.37×10^-08	1.62×10^-06
TRINITY_DN33983_c0_g1	FTC	FT	550.897	0	367.265	12.1735	2.14455	5.6765	1.37×10^-08	1.62×10^-06
TRINITY_DN1980_c0_g3	FTC	FT	283.711	0	189.141	23.8695	4.20631	5.67469	1.39×10^-08	1.64×10^-06
TRINITY_DN2037_c5_g1	FTC	FT	283.229	0	188.819	23.8687	4.20631	5.67449	1.39×10^-08	1.64×10^-06
TRINITY_DN23123_c8_g1	FTC	FT	590.998	0	393.999	23.8661	4.20616	5.67408	1.39×10^-08	1.64×10^-06
TRINITY_DN107608_c0_g4	FTC	FT	48.9394	0	32.6262	8.68916	1.53149	5.67366	1.40×10^-08	1.64×10^-06
TRINITY_DN51948_c0_g1	FTC	FT	281.473	0	187.648	23.8604	4.20631	5.67252	1.41×10^-08	1.64×10^-06
TRINITY_DN3489_c8_g1	FTC	FT	280.984	0	187.322	23.8593	4.20631	5.67227	1.41×10^-08	1.64×10^-06
TRINITY_DN91477_c0_g3	FTC	FT	280.583	0	187.055	23.8569	4.20631	5.6717	1.41×10^-08	1.64×10^-06
TRINITY_DN115671_c4_g1	FTC	FT	280.736	0	187.157	23.8554	4.20631	5.67134	1.42×10^-08	1.64×10^-06
TRINITY_DN89292_c1_g2	FTC	FT	280.736	0	187.157	23.8554	4.20631	5.67134	1.42×10^-08	1.64×10^-06
TRINITY_DN92826_c4_g1	FTC	FT	280.736	0	187.157	23.8554	4.20631	5.67134	1.42×10^-08	1.64×10^-06
TRINITY_DN22484_c1_g1	FTC	FT	279.612	0	186.408	23.8513	4.20631	5.67035	1.43×10^-08	1.65×10^-06
TRINITY_DN27341_c0_g1	FTC	FT	279.48	0	186.32	23.8502	4.20631	5.6701	1.43×10^-08	1.65×10^-06
TRINITY_DN4331_c5_g2	FTC	FT	279.115	0	186.077	23.8486	4.20631	5.66972	1.43×10^-08	1.65×10^-06
TRINITY_DN87192_c0_g1	FTC	FT	0	279.887	93.2958	-10.2843	1.81419	-5.6688	1.44×10^-08	1.65×10^-06
TRINITY_DN29407_c0_g2	FTC	FT	382.24	0	254.827	23.8438	4.20624	5.66868	1.44×10^-08	1.65×10^-06
TRINITY_DN17720_c1_g2	FTC	FT	368.631	0	245.754	23.8436	4.20624	5.66863	1.44×10^-08	1.65×10^-06
TRINITY_DN47503_c2_g1	FTC	FT	278.863	0	185.909	23.8433	4.20631	5.66845	1.44×10^-08	1.65×10^-06
TRINITY_DN3053_c3_g2	FTC	FT	278.692	0	185.795	23.8427	4.20631	5.66832	1.44×10^-08	1.65×10^-06
TRINITY_DN54193_c4_g1	FTC	FT	275.554	0	183.703	23.8304	4.20631	5.66538	1.47×10^-08	1.68×10^-06
TRINITY_DN481_c1_g3	FTC	FT	67.6912	943.53	359.637	-3.79266	0.669541	-5.66457	1.47×10^-08	1.68×10^-06
TRINITY_DN131445_c0_g1	FTC	FT	0	393.823	131.274	-10.777	1.90254	-5.66454	1.47×10^-08	1.68×10^-06
TRINITY_DN6095_c2_g1	FTC	FT	273.724	0	182.482	23.8191	4.20632	5.66271	1.49×10^-08	1.70×10^-06
TRINITY_DN4525_c1_g1	FTC	FT	272.95	0	181.967	23.8175	4.20632	5.66232	1.49×10^-08	1.70×10^-06
TRINITY_DN53029_c0_g1	FTC	FT	273.052	0	182.035	23.8155	4.20632	5.66185	1.50×10^-08	1.70×10^-06
TRINITY_DN4842_c0_g1	FTC	FT	34.6148	170.855	80.0283	-2.29148	0.404781	-5.66102	1.50×10^-08	1.71×10^-06
TRINITY_DN44372_c0_g1	FTC	FT	139.303	2.37301	93.6598	5.90061	1.04244	5.66036	1.51×10^-08	1.71×10^-06
TRINITY_DN32857_c0_g1	FTC	FT	270.292	0	180.195	23.8039	4.20632	5.65907	1.52×10^-08	1.72×10^-06
TRINITY_DN16886_c0_g1	FTC	FT	270.306	0	180.204	23.8028	4.20632	5.65882	1.52×10^-08	1.72×10^-06
TRINITY_DN12970_c3_g1	FTC	FT	674.81	0	449.874	23.8016	4.20615	5.65876	1.52×10^-08	1.72×10^-06
TRINITY_DN8252_c4_g1	FTC	FT	275.466	0	183.644	23.7998	4.20631	5.65812	1.53×10^-08	1.72×10^-06
TRINITY_DN5368_c0_g6	FTC	FT	74.5605	258.151	135.757	-1.7938	0.317095	-5.65699	1.54×10^-08	1.73×10^-06
TRINITY_DN115458_c1_g1	FTC	FT	268.946	0	179.297	23.7941	4.20632	5.65674	1.54×10^-08	1.73×10^-06
TRINITY_DN3913_c1_g2	FTC	FT	268.026	0	178.684	23.7904	4.20632	5.65585	1.55×10^-08	1.73×10^-06
TRINITY_DN36085_c3_g1	FTC	FT	267.949	0	178.633	23.7879	4.20632	5.65527	1.56×10^-08	1.73×10^-06
TRINITY_DN2652_c13_g1	FTC	FT	267.271	0	178.181	23.7874	4.20632	5.65515	1.56×10^-08	1.73×10^-06
TRINITY_DN16693_c0_g1	FTC	FT	267.143	0	178.095	23.7873	4.20632	5.65513	1.56×10^-08	1.73×10^-06
TRINITY_DN66214_c3_g1	FTC	FT	267.061	0	178.041	23.787	4.20632	5.65505	1.56×10^-08	1.73×10^-06
TRINITY_DN73797_c0_g1	FTC	FT	268.058	0	178.705	23.7837	4.20632	5.65428	1.57×10^-08	1.73×10^-06
TRINITY_DN46952_c0_g1	FTC	FT	45.6642	0	30.4428	8.5763	1.51678	5.65428	1.57×10^-08	1.73×10^-06
TRINITY_DN3951_c1_g1	FTC	FT	32.833	172.807	79.491	-2.39341	0.423295	-5.65424	1.57×10^-08	1.73×10^-06
TRINITY_DN13234_c3_g1	FTC	FT	267.189	0	178.126	23.7822	4.20632	5.65393	1.57×10^-08	1.73×10^-06
TRINITY_DN8353_c0_g2	FTC	FT	284.089	0	189.392	23.7816	4.20631	5.65379	1.57×10^-08	1.73×10^-06
TRINITY_DN20393_c6_g1	FTC	FT	287.855	0	191.903	23.7773	4.2063	5.65278	1.58×10^-08	1.74×10^-06
TRINITY_DN24557_c1_g2	FTC	FT	136.672	7.52834	93.624	4.18226	0.740156	5.6505	1.60×10^-08	1.76×10^-06
TRINITY_DN16657_c7_g1	FTC	FT	20.3816	124.771	55.1781	-2.60183	0.460473	-5.65034	1.60×10^-08	1.76×10^-06
TRINITY_DN378_c9_g1	FTC	FT	264.158	0	176.105	23.7659	4.20633	5.65003	1.60×10^-08	1.76×10^-06
TRINITY_DN17740_c3_g1	FTC	FT	262.969	0	175.312	23.7652	4.20633	5.64987	1.61×10^-08	1.76×10^-06
TRINITY_DN34887_c3_g1	FTC	FT	290.049	0	193.366	23.765	4.2063	5.64986	1.61×10^-08	1.76×10^-06
TRINITY_DN31824_c0_g1	FTC	FT	262.5	0	175	23.7626	4.20633	5.64926	1.61×10^-08	1.76×10^-06
TRINITY_DN59240_c0_g1	FTC	FT	262.066	0	174.711	23.7579	4.20633	5.64812	1.62×10^-08	1.77×10^-06
TRINITY_DN101093_c0_g1	FTC	FT	260.938	0	173.958	23.7547	4.20633	5.64738	1.63×10^-08	1.77×10^-06
TRINITY_DN8167_c2_g1	FTC	FT	404.443	107.089	305.325	1.91858	0.339734	5.64731	1.63×10^-08	1.77×10^-06
TRINITY_DN4571_c5_g1	FTC	FT	262.46	0	174.973	23.7514	4.20633	5.64658	1.64×10^-08	1.78×10^-06
TRINITY_DN613_c3_g1	FTC	FT	259.749	0	173.166	23.7483	4.20633	5.64584	1.64×10^-08	1.78×10^-06
TRINITY_DN9823_c0_g2	FTC	FT	3585.6	16.5064	2395.9	7.76584	1.37578	5.64468	1.65×10^-08	1.79×10^-06
TRINITY_DN3290_c13_g1	FTC	FT	260.437	0	173.624	23.7417	4.20633	5.64427	1.66×10^-08	1.80×10^-06
TRINITY_DN5088_c0_g2	FTC	FT	257.993	0	171.995	23.7385	4.20633	5.64352	1.67×10^-08	1.80×10^-06
TRINITY_DN35157_c0_g1	FTC	FT	260.82	0	173.88	23.733	4.20633	5.64221	1.68×10^-08	1.81×10^-06
TRINITY_DN33021_c3_g1	FTC	FT	256.686	0	171.124	23.7315	4.20634	5.64184	1.68×10^-08	1.81×10^-06
TRINITY_DN4056_c7_g1	FTC	FT	256.771	0	171.181	23.727	4.20634	5.64079	1.69×10^-08	1.82×10^-06
TRINITY_DN18716_c0_g1	FTC	FT	255.651	0	170.434	23.7261	4.20634	5.64056	1.69×10^-08	1.82×10^-06
TRINITY_DN34099_c6_g1	FTC	FT	255.651	0	170.434	23.7261	4.20634	5.64056	1.69×10^-08	1.82×10^-06
TRINITY_DN6213_c3_g1	FTC	FT	276.072	0	184.048	23.7196	4.20631	5.63904	1.71×10^-08	1.83×10^-06
TRINITY_DN2804_c3_g1	FTC	FT	0	245.015	81.6718	-10.0924	1.78993	-5.6384	1.72×10^-08	1.83×10^-06
TRINITY_DN2073_c3_g1	FTC	FT	383.312	0	255.542	23.7163	4.20624	5.63837	1.72×10^-08	1.83×10^-06
TRINITY_DN60352_c0_g3	FTC	FT	253.551	0	169.034	23.7111	4.20634	5.63699	1.73×10^-08	1.85×10^-06
TRINITY_DN93261_c1_g1	FTC	FT	251.096	0	167.398	23.7008	4.20634	5.63454	1.76×10^-08	1.87×10^-06
TRINITY_DN12597_c0_g1	FTC	FT	250.378	0	166.918	23.6969	4.20634	5.63362	1.76×10^-08	1.88×10^-06
TRINITY_DN4296_c3_g1	FTC	FT	262.178	0	174.786	23.6885	4.20633	5.63164	1.79×10^-08	1.90×10^-06
TRINITY_DN1495_c2_g1	FTC	FT	248.917	0	165.944	23.6879	4.20635	5.63147	1.79×10^-08	1.90×10^-06
TRINITY_DN19858_c0_g1	FTC	FT	248.081	0	165.387	23.6841	4.20635	5.63056	1.80×10^-08	1.90×10^-06
TRINITY_DN30072_c3_g1	FTC	FT	248.014	0	165.343	23.6836	4.20635	5.63045	1.80×10^-08	1.90×10^-06
TRINITY_DN92589_c0_g1	FTC	FT	248.484	0	165.656	23.6796	4.20635	5.6295	1.81×10^-08	1.91×10^-06
TRINITY_DN857_c1_g1	FTC	FT	39.6037	259.345	112.851	-2.70857	0.481159	-5.62926	1.81×10^-08	1.91×10^-06
TRINITY_DN16503_c0_g3	FTC	FT	0	260.567	86.8557	-10.1812	1.8087	-5.629	1.81×10^-08	1.91×10^-06
TRINITY_DN11610_c1_g1	FTC	FT	52.2902	0	34.8601	8.77123	1.5584	5.62836	1.82×10^-08	1.91×10^-06
TRINITY_DN31716_c1_g1	FTC	FT	246.67	0	164.447	23.6721	4.20635	5.62771	1.83×10^-08	1.91×10^-06
TRINITY_DN4536_c3_g1	FTC	FT	9.61258	105.867	41.6974	-3.47276	0.617086	-5.62768	1.83×10^-08	1.91×10^-06
TRINITY_DN471_c1_g1	FTC	FT	246.604	0	164.402	23.6712	4.20635	5.6275	1.83×10^-08	1.91×10^-06
TRINITY_DN5549_c0_g2	FTC	FT	1099.36	469.108	889.278	1.22771	0.218188	5.62686	1.84×10^-08	1.92×10^-06
TRINITY_DN27826_c0_g1	FTC	FT	245.356	0	163.571	23.6671	4.20635	5.62652	1.84×10^-08	1.92×10^-06
TRINITY_DN3827_c1_g1	FTC	FT	244.572	0	163.048	23.6635	4.20635	5.62566	1.85×10^-08	1.93×10^-06
TRINITY_DN95967_c0_g1	FTC	FT	243.831	0	162.554	23.6594	4.20635	5.62469	1.86×10^-08	1.93×10^-06
TRINITY_DN13382_c0_g1	FTC	FT	242.374	0	161.582	23.6514	4.20635	5.62277	1.88×10^-08	1.95×10^-06
TRINITY_DN9797_c1_g5	FTC	FT	271.776	0	181.184	23.6496	4.20632	5.62239	1.88×10^-08	1.95×10^-06
TRINITY_DN30876_c1_g1	FTC	FT	242.9	0	161.933	23.6493	4.20635	5.62229	1.88×10^-08	1.95×10^-06
TRINITY_DN11888_c1_g1	FTC	FT	0	293.996	97.9987	-10.3553	1.8424	-5.62052	1.90×10^-08	1.97×10^-06
TRINITY_DN36009_c0_g2	FTC	FT	0	293.996	97.9987	-10.3553	1.8424	-5.62052	1.90×10^-08	1.97×10^-06
TRINITY_DN47256_c4_g1	FTC	FT	0	293.996	97.9987	-10.3553	1.8424	-5.62052	1.90×10^-08	1.97×10^-06
TRINITY_DN1641_c0_g1	FTC	FT	300.912	2940.51	1180.78	-3.28621	0.584704	-5.62029	1.91×10^-08	1.97×10^-06
TRINITY_DN772_c6_g1	FTC	FT	240.133	0	160.088	23.6385	4.20636	5.61971	1.91×10^-08	1.97×10^-06
TRINITY_DN4649_c8_g1	FTC	FT	88.0602	0	58.7068	9.52708	1.69568	5.61843	1.93×10^-08	1.98×10^-06
TRINITY_DN2753_c1_g1	FTC	FT	239.352	0	159.568	23.6311	4.20636	5.61794	1.93×10^-08	1.98×10^-06
TRINITY_DN4524_c0_g1	FTC	FT	239.65	0	159.767	23.6306	4.20636	5.61784	1.93×10^-08	1.98×10^-06
TRINITY_DN45070_c1_g1	FTC	FT	237.972	0	158.648	23.6246	4.20636	5.61641	1.95×10^-08	1.99×10^-06
TRINITY_DN653_c0_g3	FTC	FT	237.619	0	158.413	23.6242	4.20636	5.6163	1.95×10^-08	1.99×10^-06
TRINITY_DN764_c2_g2	FTC	FT	237.671	0	158.447	23.6228	4.20636	5.61596	1.95×10^-08	2.00×10^-06
TRINITY_DN99810_c0_g2	FTC	FT	67.1588	0	44.7725	9.13264	1.62655	5.61473	1.97×10^-08	2.01×10^-06
TRINITY_DN131397_c1_g2	FTC	FT	291.477	0	194.318	23.6126	4.2063	5.61362	1.98×10^-08	2.02×10^-06
TRINITY_DN28913_c4_g1	FTC	FT	235.726	0	157.151	23.6118	4.20636	5.61336	1.98×10^-08	2.02×10^-06
TRINITY_DN9008_c11_g1	FTC	FT	235.934	0	157.29	23.6117	4.20636	5.61333	1.98×10^-08	2.02×10^-06
TRINITY_DN4694_c0_g1	FTC	FT	517.104	0	344.736	23.6091	4.20618	5.61295	1.99×10^-08	2.02×10^-06
TRINITY_DN39493_c0_g1	FTC	FT	234.727	0	156.485	23.6074	4.20636	5.6123	2.00×10^-08	2.02×10^-06
TRINITY_DN29493_c0_g2	FTC	FT	234.29	0	156.193	23.6027	4.20636	5.61118	2.01×10^-08	2.03×10^-06
TRINITY_DN65766_c0_g1	FTC	FT	234.142	0	156.095	23.6016	4.20637	5.61093	2.01×10^-08	2.03×10^-06
TRINITY_DN19901_c0_g1	FTC	FT	0	610.887	203.629	-11.4103	2.0338	-5.61036	2.02×10^-08	2.04×10^-06
TRINITY_DN24800_c0_g1	FTC	FT	291.468	0	194.312	23.595	4.2063	5.60945	2.03×10^-08	2.04×10^-06
TRINITY_DN46975_c0_g2	FTC	FT	0	269.417	89.8055	-10.2293	1.82373	-5.60899	2.04×10^-08	2.05×10^-06
TRINITY_DN41442_c1_g1	FTC	FT	232.149	0	154.766	23.5916	4.20637	5.60855	2.04×10^-08	2.05×10^-06
TRINITY_DN8078_c0_g2	FTC	FT	232.149	0	154.766	23.5916	4.20637	5.60855	2.04×10^-08	2.05×10^-06
TRINITY_DN88488_c0_g1	FTC	FT	231.5	0	154.334	23.5881	4.20637	5.60772	2.05×10^-08	2.05×10^-06
TRINITY_DN71791_c0_g5	FTC	FT	231.57	0	154.38	23.586	4.20637	5.60721	2.06×10^-08	2.05×10^-06
TRINITY_DN61120_c0_g1	FTC	FT	231.24	0	154.16	23.5858	4.20637	5.60716	2.06×10^-08	2.05×10^-06
TRINITY_DN12320_c4_g1	FTC	FT	230.817	0	153.878	23.5836	4.20637	5.60665	2.06×10^-08	2.06×10^-06
TRINITY_DN61_c12_g1	FTC	FT	230.477	0	153.652	23.5813	4.20637	5.60609	2.07×10^-08	2.06×10^-06
TRINITY_DN22672_c1_g1	FTC	FT	227.849	0	151.9	23.566	4.20637	5.60245	2.11×10^-08	2.10×10^-06
TRINITY_DN12255_c2_g1	FTC	FT	368.153	0	245.435	23.5575	4.20624	5.60059	2.14×10^-08	2.12×10^-06
TRINITY_DN46330_c8_g1	FTC	FT	226.167	0	150.778	23.5544	4.20638	5.59969	2.15×10^-08	2.13×10^-06
TRINITY_DN4312_c3_g1	FTC	FT	225.449	0	150.299	23.5512	4.20638	5.59892	2.16×10^-08	2.14×10^-06
TRINITY_DN36997_c0_g1	FTC	FT	229.443	0	152.962	23.5507	4.20637	5.59883	2.16×10^-08	2.14×10^-06
TRINITY_DN9461_c5_g1	FTC	FT	225.284	0	150.189	23.5486	4.20638	5.5983	2.16×10^-08	2.14×10^-06
TRINITY_DN18608_c0_g1	FTC	FT	224.02	0	149.347	23.5417	4.20638	5.59667	2.19×10^-08	2.16×10^-06
TRINITY_DN6048_c0_g1	FTC	FT	711.087	122.106	514.76	2.54239	0.454325	5.59597	2.19×10^-08	2.16×10^-06
TRINITY_DN22857_c0_g1	FTC	FT	224.094	0	149.396	23.5378	4.20638	5.59575	2.20×10^-08	2.16×10^-06
TRINITY_DN116139_c3_g1	FTC	FT	222.981	0	148.654	23.5359	4.20638	5.59529	2.20×10^-08	2.16×10^-06
TRINITY_DN944_c11_g1	FTC	FT	0	369.579	123.193	-10.6853	1.90998	-5.59447	2.21×10^-08	2.17×10^-06
TRINITY_DN38464_c0_g3	FTC	FT	221.7	0	147.8	23.5285	4.20638	5.59351	2.23×10^-08	2.18×10^-06
TRINITY_DN6009_c3_g1	FTC	FT	221.877	0	147.918	23.5266	4.20638	5.59307	2.23×10^-08	2.18×10^-06
TRINITY_DN2468_c1_g1	FTC	FT	312.697	0	208.465	23.5227	4.20628	5.59229	2.24×10^-08	2.19×10^-06
TRINITY_DN21328_c0_g2	FTC	FT	0	303.859	101.286	-10.4029	1.8605	-5.59146	2.25×10^-08	2.20×10^-06
TRINITY_DN96886_c1_g1	FTC	FT	0	303.859	101.286	-10.4029	1.8605	-5.59146	2.25×10^-08	2.20×10^-06
TRINITY_DN2925_c9_g1	FTC	FT	220.259	0	146.839	23.5153	4.20639	5.59038	2.27×10^-08	2.20×10^-06
TRINITY_DN15837_c1_g2	FTC	FT	219.776	0	146.517	23.5151	4.20639	5.59034	2.27×10^-08	2.20×10^-06
TRINITY_DN36524_c0_g3	FTC	FT	218.903	0	145.935	23.51	4.20639	5.58912	2.28×10^-08	2.21×10^-06
TRINITY_DN16156_c2_g2	FTC	FT	218.611	0	145.741	23.5079	4.20639	5.58862	2.29×10^-08	2.21×10^-06
TRINITY_DN21204_c4_g1	FTC	FT	218.611	0	145.741	23.5079	4.20639	5.58862	2.29×10^-08	2.21×10^-06
TRINITY_DN4872_c0_g1	FTC	FT	218.625	0	145.75	23.5077	4.20639	5.58858	2.29×10^-08	2.21×10^-06
TRINITY_DN20456_c0_g1	FTC	FT	310.202	0	206.802	23.5035	4.20628	5.58772	2.30×10^-08	2.22×10^-06
TRINITY_DN91270_c0_g1	FTC	FT	217.682	0	145.121	23.5011	4.20639	5.587	2.31×10^-08	2.23×10^-06
TRINITY_DN25389_c0_g4	FTC	FT	217.928	0	145.285	23.5005	4.20639	5.58687	2.31×10^-08	2.23×10^-06
TRINITY_DN29909_c0_g1	FTC	FT	217.189	0	144.793	23.4989	4.20639	5.58647	2.32×10^-08	2.23×10^-06
TRINITY_DN41287_c0_g1	FTC	FT	217.018	0	144.678	23.4979	4.20639	5.58623	2.32×10^-08	2.23×10^-06
TRINITY_DN27276_c2_g2	FTC	FT	217.008	0	144.672	23.4959	4.20639	5.58577	2.33×10^-08	2.23×10^-06
TRINITY_DN70494_c7_g1	FTC	FT	216.712	0	144.474	23.4955	4.20639	5.58567	2.33×10^-08	2.23×10^-06
TRINITY_DN62241_c2_g1	FTC	FT	216.522	0	144.348	23.4942	4.20639	5.58535	2.33×10^-08	2.23×10^-06
TRINITY_DN49420_c8_g1	FTC	FT	232.161	0	154.774	23.4938	4.20637	5.58529	2.33×10^-08	2.23×10^-06
TRINITY_DN68807_c0_g1	FTC	FT	215.395	0	143.597	23.4873	4.20639	5.58371	2.35×10^-08	2.25×10^-06
TRINITY_DN130948_c1_g2	FTC	FT	0	448.14	149.38	-10.9635	1.96357	-5.58344	2.36×10^-08	2.25×10^-06
TRINITY_DN74625_c8_g1	FTC	FT	0	264.831	88.2769	-10.2045	1.82785	-5.58282	2.37×10^-08	2.25×10^-06
TRINITY_DN1563_c1_g1	FTC	FT	214.224	0	142.816	23.4794	4.2064	5.58184	2.38×10^-08	2.26×10^-06
TRINITY_DN26242_c0_g1	FTC	FT	213.834	0	142.556	23.4777	4.2064	5.58142	2.39×10^-08	2.26×10^-06
TRINITY_DN5554_c0_g2	FTC	FT	213.818	0	142.546	23.477	4.2064	5.58126	2.39×10^-08	2.26×10^-06
TRINITY_DN54854_c3_g1	FTC	FT	213.792	0	142.528	23.4766	4.2064	5.58117	2.39×10^-08	2.26×10^-06
TRINITY_DN60671_c0_g2	FTC	FT	50.4378	0	33.6252	8.72751	1.56395	5.58043	2.40×10^-08	2.27×10^-06
TRINITY_DN494_c4_g1	FTC	FT	403.616	0	269.077	23.4686	4.20622	5.5795	2.41×10^-08	2.27×10^-06
TRINITY_DN28996_c1_g4	FTC	FT	292.828	0	195.219	23.4687	4.2063	5.57941	2.41×10^-08	2.27×10^-06
TRINITY_DN2216_c1_g2	FTC	FT	7.50228	824.797	279.934	-6.74043	1.20809	-5.57941	2.41×10^-08	2.27×10^-06
TRINITY_DN35891_c1_g1	FTC	FT	101.385	278.714	160.495	-1.46039	0.261761	-5.57912	2.42×10^-08	2.27×10^-06
TRINITY_DN10344_c1_g1	FTC	FT	212.33	0	141.554	23.4671	4.2064	5.57891	2.42×10^-08	2.27×10^-06
TRINITY_DN39606_c0_g2	FTC	FT	212.209	0	141.472	23.4668	4.2064	5.57884	2.42×10^-08	2.27×10^-06
TRINITY_DN101793_c1_g1	FTC	FT	212.134	0	141.423	23.4658	4.2064	5.5786	2.42×10^-08	2.27×10^-06
TRINITY_DN82866_c1_g1	FTC	FT	212.317	0	141.544	23.4614	4.2064	5.57754	2.44×10^-08	2.27×10^-06
TRINITY_DN40988_c0_g1	FTC	FT	211.446	0	140.964	23.4612	4.2064	5.5775	2.44×10^-08	2.27×10^-06
TRINITY_DN54018_c1_g1	FTC	FT	211.446	0	140.964	23.4612	4.2064	5.5775	2.44×10^-08	2.27×10^-06
TRINITY_DN74047_c4_g1	FTC	FT	211.446	0	140.964	23.4612	4.2064	5.5775	2.44×10^-08	2.27×10^-06
TRINITY_DN16215_c0_g2	FTC	FT	211.159	0	140.773	23.46	4.2064	5.57721	2.44×10^-08	2.27×10^-06
TRINITY_DN53091_c0_g2	FTC	FT	211.224	0	140.816	23.4598	4.2064	5.57716	2.44×10^-08	2.27×10^-06
TRINITY_DN44442_c0_g1	FTC	FT	211.39	0	140.927	23.4587	4.2064	5.5769	2.45×10^-08	2.27×10^-06
TRINITY_DN40089_c0_g1	FTC	FT	0	337.431	112.477	-10.554	1.89247	-5.57687	2.45×10^-08	2.27×10^-06
TRINITY_DN20074_c1_g1	FTC	FT	211.805	0	141.203	23.4579	4.2064	5.57671	2.45×10^-08	2.27×10^-06
TRINITY_DN50435_c0_g1	FTC	FT	43.2224	0	28.8149	8.49388	1.52323	5.57624	2.46×10^-08	2.27×10^-06
TRINITY_DN26264_c5_g1	FTC	FT	210.902	0	140.601	23.4553	4.2064	5.57608	2.46×10^-08	2.27×10^-06
TRINITY_DN6310_c2_g1	FTC	FT	210.261	0	140.174	23.4537	4.2064	5.57571	2.47×10^-08	2.27×10^-06
TRINITY_DN41061_c6_g1	FTC	FT	210.315	0	140.21	23.4533	4.2064	5.57563	2.47×10^-08	2.27×10^-06
TRINITY_DN12556_c6_g1	FTC	FT	210.311	0	140.207	23.4531	4.2064	5.57558	2.47×10^-08	2.27×10^-06
TRINITY_DN1947_c2_g1	FTC	FT	0	265.876	88.6254	-10.2103	1.83131	-5.5754	2.47×10^-08	2.27×10^-06
TRINITY_DN7799_c0_g2	FTC	FT	210.693	0	140.462	23.4507	4.2064	5.57499	2.48×10^-08	2.28×10^-06
TRINITY_DN19488_c3_g1	FTC	FT	0	266.79	88.9301	-10.2152	1.83255	-5.57431	2.49×10^-08	2.28×10^-06
TRINITY_DN8130_c0_g2	FTC	FT	209.734	0	139.823	23.4476	4.2064	5.57427	2.49×10^-08	2.28×10^-06
TRINITY_DN30655_c0_g1	FTC	FT	0	364.993	121.664	-10.6673	1.91393	-5.5735	2.50×10^-08	2.29×10^-06
TRINITY_DN6307_c2_g1	FTC	FT	208.996	0	139.33	23.4428	4.20641	5.57311	2.50×10^-08	2.29×10^-06
TRINITY_DN24822_c2_g1	FTC	FT	208.258	0	138.838	23.4401	4.20641	5.57249	2.51×10^-08	2.29×10^-06
TRINITY_DN24879_c0_g1	FTC	FT	208.477	0	138.985	23.4401	4.20641	5.57247	2.51×10^-08	2.29×10^-06
TRINITY_DN39911_c0_g1	FTC	FT	234.142	0	156.095	23.4356	4.20637	5.57146	2.53×10^-08	2.30×10^-06
TRINITY_DN41134_c1_g1	FTC	FT	234.142	0	156.095	23.4356	4.20637	5.57146	2.53×10^-08	2.30×10^-06
TRINITY_DN18755_c0_g1	FTC	FT	288.077	8.48246	194.879	5.08734	0.913113	5.57143	2.53×10^-08	2.30×10^-06
TRINITY_DN1852_c4_g2	FTC	FT	207.552	0	138.368	23.4335	4.20641	5.57091	2.53×10^-08	2.30×10^-06
TRINITY_DN2979_c0_g1	FTC	FT	209.247	0	139.498	23.4327	4.2064	5.57072	2.54×10^-08	2.30×10^-06
TRINITY_DN1554_c7_g1	FTC	FT	0	298.784	99.5946	-10.3786	1.8635	-5.56944	2.56×10^-08	2.31×10^-06
TRINITY_DN28818_c0_g2	FTC	FT	213.267	0	142.178	23.4263	4.2064	5.56921	2.56×10^-08	2.31×10^-06
TRINITY_DN4536_c6_g1	FTC	FT	205.929	0	137.286	23.4248	4.20641	5.56882	2.56×10^-08	2.32×10^-06
TRINITY_DN60116_c0_g1	FTC	FT	206.132	0	137.421	23.4243	4.20641	5.56871	2.57×10^-08	2.32×10^-06
TRINITY_DN19377_c0_g1	FTC	FT	205.575	0	137.05	23.4202	4.20641	5.56773	2.58×10^-08	2.32×10^-06
TRINITY_DN5484_c3_g4	FTC	FT	0	250.641	83.547	-10.1251	1.81854	-5.56771	2.58×10^-08	2.32×10^-06
TRINITY_DN108268_c0_g1	FTC	FT	205.721	0	137.147	23.42	4.20641	5.56769	2.58×10^-08	2.32×10^-06
TRINITY_DN22889_c0_g1	FTC	FT	251.603	0	167.735	23.4183	4.20634	5.56738	2.59×10^-08	2.32×10^-06
TRINITY_DN10957_c0_g1	FTC	FT	170.138	48.771	129.682	1.80029	0.323382	5.56708	2.59×10^-08	2.32×10^-06
TRINITY_DN70684_c0_g1	FTC	FT	2.36482	61.9103	22.2133	-4.71405	0.847188	-5.56435	2.63×10^-08	2.36×10^-06
TRINITY_DN110518_c0_g1	FTC	FT	406.926	0	271.284	23.4036	4.20622	5.56405	2.64×10^-08	2.36×10^-06
TRINITY_DN6467_c0_g4	FTC	FT	205.981	0	137.321	23.4046	4.20641	5.56404	2.64×10^-08	2.36×10^-06
TRINITY_DN2077_c9_g1	FTC	FT	203.148	0	135.432	23.4037	4.20642	5.56382	2.64×10^-08	2.36×10^-06
TRINITY_DN3766_c0_g3	FTC	FT	202.669	0	135.113	23.4013	4.20642	5.56324	2.65×10^-08	2.36×10^-06
TRINITY_DN4521_c5_g1	FTC	FT	202.445	0	134.964	23.4006	4.20642	5.56307	2.65×10^-08	2.36×10^-06
TRINITY_DN24582_c2_g1	FTC	FT	202.16	0	134.773	23.3989	4.20642	5.56266	2.66×10^-08	2.36×10^-06
TRINITY_DN73614_c0_g1	FTC	FT	77.1698	5.23536	53.1916	3.89596	0.700382	5.56262	2.66×10^-08	2.36×10^-06
TRINITY_DN30071_c0_g1	FTC	FT	202.88	0	135.253	23.3976	4.20642	5.56235	2.66×10^-08	2.36×10^-06
TRINITY_DN1494_c11_g1	FTC	FT	0	296.876	98.9585	-10.3694	1.8649	-5.56029	2.69×10^-08	2.38×10^-06
TRINITY_DN16237_c0_g1	FTC	FT	11.2371	551.458	191.311	-5.62285	1.01125	-5.56027	2.69×10^-08	2.38×10^-06
TRINITY_DN98203_c4_g1	FTC	FT	200.837	0	133.891	23.3885	4.20642	5.5602	2.69×10^-08	2.38×10^-06
TRINITY_DN114188_c5_g1	FTC	FT	200.217	0	133.478	23.385	4.20642	5.55937	2.71×10^-08	2.39×10^-06
TRINITY_DN131634_c2_g1	FTC	FT	199.837	0	133.225	23.3826	4.20642	5.55877	2.72×10^-08	2.40×10^-06
TRINITY_DN5629_c2_g1	FTC	FT	199.607	0	133.071	23.3808	4.20642	5.55836	2.72×10^-08	2.40×10^-06
TRINITY_DN17302_c0_g1	FTC	FT	199.725	0	133.15	23.3798	4.20642	5.55811	2.73×10^-08	2.40×10^-06
TRINITY_DN798_c12_g1	FTC	FT	199.725	0	133.15	23.3798	4.20642	5.55811	2.73×10^-08	2.40×10^-06
TRINITY_DN29313_c0_g1	FTC	FT	199.748	0	133.165	23.3784	4.20642	5.55778	2.73×10^-08	2.40×10^-06
TRINITY_DN57181_c0_g2	FTC	FT	399.855	0	266.57	23.377	4.20623	5.5577	2.73×10^-08	2.40×10^-06
TRINITY_DN9679_c0_g1	FTC	FT	158.862	0	105.908	10.3794	1.86773	5.55726	2.74×10^-08	2.40×10^-06
TRINITY_DN111106_c0_g1	FTC	FT	199.238	0	132.825	23.3738	4.20642	5.5567	2.75×10^-08	2.40×10^-06
TRINITY_DN95857_c1_g1	FTC	FT	0	321.244	107.081	-10.4831	1.88691	-5.55571	2.76×10^-08	2.41×10^-06
TRINITY_DN15964_c0_g2	FTC	FT	0	233.326	77.7753	-10.0218	1.80389	-5.55566	2.77×10^-08	2.41×10^-06
TRINITY_DN30763_c1_g2	FTC	FT	197.507	0	131.671	23.3658	4.20643	5.55478	2.78×10^-08	2.42×10^-06
TRINITY_DN5332_c1_g1	FTC	FT	197.507	0	131.671	23.3658	4.20643	5.55478	2.78×10^-08	2.42×10^-06
TRINITY_DN94204_c0_g1	FTC	FT	197.507	0	131.671	23.3658	4.20643	5.55478	2.78×10^-08	2.42×10^-06
TRINITY_DN27320_c7_g1	FTC	FT	197.025	0	131.35	23.3616	4.20643	5.55379	2.80×10^-08	2.42×10^-06
TRINITY_DN69332_c2_g1	FTC	FT	197.025	0	131.35	23.3616	4.20643	5.55379	2.80×10^-08	2.42×10^-06
TRINITY_DN21334_c0_g1	FTC	FT	197.808	0	131.872	23.3577	4.20643	5.55286	2.81×10^-08	2.43×10^-06
TRINITY_DN28951_c2_g1	FTC	FT	387.943	0	258.629	23.3527	4.20623	5.55193	2.83×10^-08	2.44×10^-06
TRINITY_DN62452_c1_g1	FTC	FT	387.943	0	258.629	23.3527	4.20623	5.55193	2.83×10^-08	2.44×10^-06
TRINITY_DN56017_c3_g1	FTC	FT	195.664	0	130.442	23.3536	4.20643	5.55187	2.83×10^-08	2.44×10^-06
TRINITY_DN109814_c0_g1	FTC	FT	195.289	0	130.193	23.3511	4.20643	5.55129	2.84×10^-08	2.44×10^-06
TRINITY_DN11946_c0_g1	FTC	FT	195.289	0	130.193	23.3511	4.20643	5.55129	2.84×10^-08	2.44×10^-06
TRINITY_DN50099_c0_g1	FTC	FT	195.289	0	130.193	23.3511	4.20643	5.55129	2.84×10^-08	2.44×10^-06
TRINITY_DN119215_c1_g2	FTC	FT	44.9243	0	29.9496	8.56186	1.54268	5.54999	2.86×10^-08	2.45×10^-06
TRINITY_DN16620_c1_g1	FTC	FT	195.649	0	130.432	23.3432	4.20643	5.5494	2.87×10^-08	2.46×10^-06
TRINITY_DN8559_c3_g1	FTC	FT	194.127	0	129.418	23.3414	4.20643	5.54897	2.87×10^-08	2.46×10^-06
TRINITY_DN26981_c3_g3	FTC	FT	193.872	0	129.248	23.3402	4.20643	5.54868	2.88×10^-08	2.46×10^-06
TRINITY_DN27017_c0_g4	FTC	FT	0	233.141	77.7137	-10.0207	1.80602	-5.5485	2.88×10^-08	2.46×10^-06
TRINITY_DN6297_c2_g1	FTC	FT	193.51	0	129.007	23.3354	4.20644	5.54755	2.90×10^-08	2.47×10^-06
TRINITY_DN22664_c2_g4	FTC	FT	211.79	0	141.193	23.3348	4.2064	5.54744	2.90×10^-08	2.47×10^-06
TRINITY_DN93766_c0_g1	FTC	FT	202.048	0	134.699	23.3326	4.20642	5.54689	2.91×10^-08	2.48×10^-06
TRINITY_DN105154_c0_g1	FTC	FT	326.317	0	217.544	23.3284	4.20627	5.54611	2.92×10^-08	2.49×10^-06
TRINITY_DN1922_c1_g1	FTC	FT	192.068	0	128.045	23.3273	4.20644	5.54562	2.93×10^-08	2.49×10^-06
TRINITY_DN24706_c1_g6	FTC	FT	64.3554	0	42.9036	9.06965	1.6356	5.54515	2.94×10^-08	2.49×10^-06
TRINITY_DN102431_c0_g3	FTC	FT	191.191	0	127.461	23.3249	4.20644	5.54504	2.94×10^-08	2.49×10^-06
TRINITY_DN12663_c7_g1	FTC	FT	191.482	0	127.654	23.3232	4.20644	5.54464	2.95×10^-08	2.49×10^-06
TRINITY_DN112047_c0_g1	FTC	FT	192.727	0	128.485	23.3231	4.20644	5.54463	2.95×10^-08	2.49×10^-06
TRINITY_DN39072_c6_g1	FTC	FT	190.458	0	126.972	23.3137	4.20644	5.54237	2.98×10^-08	2.51×10^-06
TRINITY_DN107903_c0_g1	FTC	FT	189.556	0	126.371	23.3092	4.20644	5.54131	3.00×10^-08	2.51×10^-06
TRINITY_DN5187_c1_g1	FTC	FT	189.556	0	126.371	23.3092	4.20644	5.54131	3.00×10^-08	2.51×10^-06
TRINITY_DN54475_c0_g4	FTC	FT	189.556	0	126.371	23.3092	4.20644	5.54131	3.00×10^-08	2.51×10^-06
TRINITY_DN25950_c0_g5	FTC	FT	189.525	0	126.35	23.3082	4.20644	5.54107	3.01×10^-08	2.51×10^-06
TRINITY_DN444_c3_g1	FTC	FT	189.068	0	126.046	23.3061	4.20644	5.54057	3.01×10^-08	2.51×10^-06
TRINITY_DN10124_c3_g1	FTC	FT	189.349	0	126.233	23.3058	4.20644	5.5405	3.02×10^-08	2.51×10^-06
TRINITY_DN102836_c0_g1	FTC	FT	189.349	0	126.233	23.3058	4.20644	5.5405	3.02×10^-08	2.51×10^-06
TRINITY_DN124554_c0_g1	FTC	FT	189.349	0	126.233	23.3058	4.20644	5.5405	3.02×10^-08	2.51×10^-06
TRINITY_DN27240_c0_g1	FTC	FT	189.349	0	126.233	23.3058	4.20644	5.5405	3.02×10^-08	2.51×10^-06
TRINITY_DN72294_c1_g1	FTC	FT	189.349	0	126.233	23.3058	4.20644	5.5405	3.02×10^-08	2.51×10^-06
TRINITY_DN11645_c1_g1	FTC	FT	189.187	0	126.125	23.3053	4.20644	5.54038	3.02×10^-08	2.51×10^-06
TRINITY_DN428_c8_g1	FTC	FT	189.187	0	126.125	23.3053	4.20644	5.54038	3.02×10^-08	2.51×10^-06
TRINITY_DN8677_c2_g1	FTC	FT	189.435	0	126.29	23.3051	4.20644	5.54033	3.02×10^-08	2.51×10^-06
TRINITY_DN54824_c0_g2	FTC	FT	188.517	0	125.678	23.2986	4.20645	5.53878	3.05×10^-08	2.53×10^-06
TRINITY_DN5995_c2_g1	FTC	FT	188.517	0	125.678	23.2986	4.20645	5.53878	3.05×10^-08	2.53×10^-06
TRINITY_DN12084_c0_g1	FTC	FT	187.921	0	125.281	23.2961	4.20645	5.53818	3.06×10^-08	2.54×10^-06
TRINITY_DN5398_c10_g1	FTC	FT	187.985	0	125.323	23.2946	4.20645	5.53783	3.06×10^-08	2.54×10^-06
TRINITY_DN4506_c1_g2	FTC	FT	187.386	0	124.924	23.2927	4.20645	5.53737	3.07×10^-08	2.54×10^-06
TRINITY_DN10465_c0_g1	FTC	FT	6205.38	1205.05	4538.6	2.36434	0.427005	5.53702	3.08×10^-08	2.55×10^-06
TRINITY_DN3329_c1_g1	FTC	FT	8.70778	75.3571	30.9242	-3.07913	0.556352	-5.53449	3.12×10^-08	2.58×10^-06
TRINITY_DN4967_c0_g2	FTC	FT	268.025	20.8214	185.624	3.68763	0.666345	5.53412	3.13×10^-08	2.58×10^-06
TRINITY_DN22541_c2_g1	FTC	FT	185.769	0	123.846	23.2783	4.20645	5.53394	3.13×10^-08	2.58×10^-06
TRINITY_DN89860_c2_g1	FTC	FT	185.105	0	123.403	23.2761	4.20645	5.53343	3.14×10^-08	2.59×10^-06
TRINITY_DN8056_c0_g1	FTC	FT	39.5061	1.33885	26.7837	4.91986	0.889211	5.53284	3.15×10^-08	2.59×10^-06
TRINITY_DN77621_c0_g1	FTC	FT	184.506	0	123.004	23.2711	4.20645	5.53224	3.16×10^-08	2.59×10^-06
TRINITY_DN3328_c2_g1	FTC	FT	184.669	0	123.113	23.2703	4.20645	5.53204	3.17×10^-08	2.59×10^-06
TRINITY_DN12064_c0_g2	FTC	FT	184.676	0	123.118	23.2702	4.20645	5.53203	3.17×10^-08	2.59×10^-06
TRINITY_DN6814_c1_g1	FTC	FT	183.973	0	122.649	23.268	4.20646	5.5315	3.17×10^-08	2.59×10^-06
TRINITY_DN9367_c5_g1	FTC	FT	477.173	0	318.116	23.2658	4.2062	5.53131	3.18×10^-08	2.59×10^-06
TRINITY_DN31119_c0_g4	FTC	FT	183.801	0	122.534	23.2664	4.20646	5.53112	3.18×10^-08	2.59×10^-06
TRINITY_DN4727_c3_g1	FTC	FT	183.801	0	122.534	23.2664	4.20646	5.53112	3.18×10^-08	2.59×10^-06
TRINITY_DN23137_c0_g1	FTC	FT	183.802	0	122.535	23.2654	4.20646	5.53087	3.19×10^-08	2.59×10^-06
TRINITY_DN58739_c0_g1	FTC	FT	58.1856	3.12704	39.8327	4.20155	0.759677	5.53071	3.19×10^-08	2.59×10^-06
TRINITY_DN109564_c0_g1	FTC	FT	184.769	0	123.179	23.2645	4.20645	5.53068	3.19×10^-08	2.59×10^-06
TRINITY_DN18724_c1_g1	FTC	FT	337.06	0	224.707	23.2633	4.20626	5.53063	3.19×10^-08	2.59×10^-06
TRINITY_DN37329_c1_g2	FTC	FT	183.13	0	122.087	23.2612	4.20646	5.52988	3.20×10^-08	2.60×10^-06
TRINITY_DN76095_c4_g1	FTC	FT	182.919	0	121.946	23.2592	4.20646	5.52941	3.21×10^-08	2.61×10^-06
TRINITY_DN3903_c7_g1	FTC	FT	189.625	0	126.417	23.2554	4.20644	5.52852	3.23×10^-08	2.62×10^-06
TRINITY_DN5893_c0_g1	FTC	FT	295.162	0	196.775	23.2513	4.2063	5.52775	3.24×10^-08	2.62×10^-06
TRINITY_DN12290_c1_g1	FTC	FT	181.981	0	121.321	23.2506	4.20646	5.52736	3.25×10^-08	2.63×10^-06
TRINITY_DN2664_c0_g2	FTC	FT	183.365	0	122.243	23.2501	4.20646	5.52723	3.25×10^-08	2.63×10^-06
TRINITY_DN21642_c1_g1	FTC	FT	181.715	0	121.143	23.2484	4.20646	5.52683	3.26×10^-08	2.63×10^-06
TRINITY_DN5975_c1_g2	FTC	FT	181.547	0	121.031	23.248	4.20646	5.52674	3.26×10^-08	2.63×10^-06
TRINITY_DN2461_c13_g1	FTC	FT	286.75	0	191.167	23.2453	4.2063	5.5263	3.27×10^-08	2.63×10^-06
TRINITY_DN101517_c0_g1	FTC	FT	179.763	0	119.842	23.2349	4.20647	5.52361	3.32×10^-08	2.67×10^-06
TRINITY_DN2592_c2_g2	FTC	FT	179.792	0	119.861	23.2345	4.20647	5.52353	3.32×10^-08	2.67×10^-06
TRINITY_DN87813_c0_g1	FTC	FT	353.198	0	235.465	23.2331	4.20625	5.52346	3.32×10^-08	2.67×10^-06
TRINITY_DN8728_c0_g1	FTC	FT	88.3903	0	58.9269	9.53253	1.72589	5.52326	3.33×10^-08	2.67×10^-06
TRINITY_DN2458_c6_g1	FTC	FT	179.049	0	119.366	23.2271	4.20647	5.52176	3.36×10^-08	2.69×10^-06
TRINITY_DN33694_c0_g2	FTC	FT	179.196	0	119.464	23.2251	4.20647	5.52129	3.37×10^-08	2.69×10^-06
TRINITY_DN56769_c0_g1	FTC	FT	179.196	0	119.464	23.2251	4.20647	5.52129	3.37×10^-08	2.69×10^-06
TRINITY_DN3761_c7_g1	FTC	FT	180.982	0	120.655	23.2232	4.20646	5.52084	3.37×10^-08	2.69×10^-06
TRINITY_DN8025_c5_g1	FTC	FT	57.9211	0	38.6141	8.91714	1.6153	5.52043	3.38×10^-08	2.69×10^-06
TRINITY_DN15858_c1_g1	FTC	FT	534.489	2869.42	1312.8	-2.4253	0.439338	-5.52036	3.38×10^-08	2.69×10^-06
TRINITY_DN2067_c0_g2	FTC	FT	343.461	0	228.974	23.2193	4.20626	5.52019	3.39×10^-08	2.69×10^-06
TRINITY_DN9429_c0_g1	FTC	FT	0	357.302	119.101	-10.6367	1.9269	-5.5201	3.39×10^-08	2.69×10^-06
TRINITY_DN98029_c0_g2	FTC	FT	177.503	0	118.335	23.2178	4.20647	5.51954	3.40×10^-08	2.70×10^-06
TRINITY_DN69542_c4_g1	FTC	FT	177.829	0	118.552	23.2169	4.20647	5.51933	3.40×10^-08	2.70×10^-06
TRINITY_DN111254_c3_g1	FTC	FT	177.309	0	118.206	23.2145	4.20647	5.51875	3.41×10^-08	2.70×10^-06
TRINITY_DN11_c4_g1	FTC	FT	177.705	0	118.47	23.2142	4.20647	5.51868	3.42×10^-08	2.70×10^-06
TRINITY_DN57303_c1_g2	FTC	FT	177.254	0	118.169	23.2129	4.20647	5.51838	3.42×10^-08	2.70×10^-06
TRINITY_DN636_c2_g2	FTC	FT	176.763	0	117.842	23.2121	4.20647	5.51817	3.43×10^-08	2.70×10^-06
TRINITY_DN6310_c0_g1	FTC	FT	176.66	0	117.773	23.211	4.20647	5.51792	3.43×10^-08	2.70×10^-06
TRINITY_DN6863_c0_g1	FTC	FT	176.69	0	117.793	23.2108	4.20647	5.51789	3.43×10^-08	2.70×10^-06
TRINITY_DN62901_c0_g2	FTC	FT	176.808	0	117.872	23.2107	4.20647	5.51786	3.43×10^-08	2.70×10^-06
TRINITY_DN8367_c0_g1	FTC	FT	423.239	78.3732	308.284	2.43051	0.440494	5.51771	3.43×10^-08	2.70×10^-06
TRINITY_DN15115_c5_g1	FTC	FT	0	228.13	76.0435	-9.98934	1.8105	-5.51746	3.44×10^-08	2.70×10^-06
TRINITY_DN49152_c0_g1	FTC	FT	176.284	0	117.523	23.2082	4.20647	5.51725	3.44×10^-08	2.70×10^-06
TRINITY_DN3609_c0_g2	FTC	FT	176.446	0	117.631	23.2077	4.20647	5.51715	3.45×10^-08	2.70×10^-06
TRINITY_DN45912_c1_g1	FTC	FT	177.379	0	118.253	23.2071	4.20647	5.517	3.45×10^-08	2.70×10^-06
TRINITY_DN6404_c0_g1	FTC	FT	86.0394	11.4494	61.1761	2.90861	0.527218	5.5169	3.45×10^-08	2.70×10^-06
TRINITY_DN5203_c1_g2	FTC	FT	202.077	0	134.718	23.2049	4.20642	5.51655	3.46×10^-08	2.70×10^-06
TRINITY_DN8953_c2_g1	FTC	FT	0	240.835	80.2784	-10.0676	1.82513	-5.51608	3.47×10^-08	2.70×10^-06
TRINITY_DN631_c1_g1	FTC	FT	1453.17	385.551	1097.3	1.9149	0.347155	5.51598	3.47×10^-08	2.70×10^-06
TRINITY_DN10363_c0_g2	FTC	FT	190.585	0	127.057	23.2021	4.20644	5.51585	3.47×10^-08	2.70×10^-06
TRINITY_DN51660_c1_g1	FTC	FT	57.0196	0	38.013	8.90633	1.61491	5.51505	3.49×10^-08	2.71×10^-06
TRINITY_DN52379_c1_g1	FTC	FT	213.476	0	142.317	23.1979	4.2064	5.5149	3.49×10^-08	2.71×10^-06
TRINITY_DN1840_c1_g1	FTC	FT	175.653	0	117.102	23.1964	4.20648	5.51444	3.50×10^-08	2.71×10^-06
TRINITY_DN7566_c8_g1	FTC	FT	174.415	0	116.277	23.192	4.20648	5.5134	3.52×10^-08	2.73×10^-06
TRINITY_DN20724_c0_g3	FTC	FT	174.217	0	116.145	23.1912	4.20648	5.5132	3.52×10^-08	2.73×10^-06
TRINITY_DN58283_c1_g1	FTC	FT	175.05	0	116.7	23.1886	4.20648	5.51258	3.54×10^-08	2.73×10^-06
TRINITY_DN3857_c0_g1	FTC	FT	185.527	600.985	324.013	-1.69466	0.307463	-5.51175	3.55×10^-08	2.74×10^-06
TRINITY_DN6143_c6_g1	FTC	FT	173.162	0	115.441	23.1808	4.20648	5.51072	3.57×10^-08	2.74×10^-06
TRINITY_DN12470_c2_g1	FTC	FT	172.835	0	115.224	23.1802	4.20648	5.51059	3.58×10^-08	2.74×10^-06
TRINITY_DN11974_c0_g4	FTC	FT	183.859	0	122.572	23.1796	4.20646	5.51049	3.58×10^-08	2.74×10^-06
TRINITY_DN122854_c0_g1	FTC	FT	173.218	0	115.479	23.1785	4.20648	5.51018	3.58×10^-08	2.74×10^-06
TRINITY_DN19094_c2_g1	FTC	FT	173.218	0	115.479	23.1785	4.20648	5.51018	3.58×10^-08	2.74×10^-06
TRINITY_DN23726_c8_g1	FTC	FT	173.218	0	115.479	23.1785	4.20648	5.51018	3.58×10^-08	2.74×10^-06
TRINITY_DN31606_c1_g1	FTC	FT	173.218	0	115.479	23.1785	4.20648	5.51018	3.58×10^-08	2.74×10^-06
TRINITY_DN6356_c2_g1	FTC	FT	173.218	0	115.479	23.1785	4.20648	5.51018	3.58×10^-08	2.74×10^-06
TRINITY_DN6916_c3_g1	FTC	FT	172.706	0	115.138	23.177	4.20648	5.50983	3.59×10^-08	2.75×10^-06
TRINITY_DN2499_c2_g1	FTC	FT	172.552	0	115.034	23.1759	4.20648	5.50956	3.60×10^-08	2.75×10^-06
TRINITY_DN5063_c0_g2	FTC	FT	173.655	0	115.77	23.1743	4.20648	5.50919	3.60×10^-08	2.75×10^-06
TRINITY_DN19223_c1_g1	FTC	FT	172.023	0	114.682	23.1736	4.20649	5.50901	3.61×10^-08	2.75×10^-06
TRINITY_DN120503_c0_g1	FTC	FT	0	241.605	80.5351	-10.0721	1.82832	-5.50893	3.61×10^-08	2.75×10^-06
TRINITY_DN116734_c0_g6	FTC	FT	187.337	0	124.891	23.1724	4.20645	5.50878	3.61×10^-08	2.75×10^-06
TRINITY_DN259_c15_g1	FTC	FT	172.395	0	114.93	23.1725	4.20648	5.50876	3.61×10^-08	2.75×10^-06
TRINITY_DN106813_c0_g3	FTC	FT	171.461	0	114.307	23.1694	4.20649	5.50802	3.63×10^-08	2.75×10^-06
TRINITY_DN16134_c3_g1	FTC	FT	300.28	0	200.187	23.1681	4.20629	5.50797	3.63×10^-08	2.75×10^-06
TRINITY_DN39720_c0_g2	FTC	FT	172.043	0	114.695	23.1674	4.20649	5.50755	3.64×10^-08	2.75×10^-06
TRINITY_DN38339_c0_g2	FTC	FT	0	259.611	86.5369	-10.1758	1.84761	-5.50754	3.64×10^-08	2.75×10^-06
TRINITY_DN12647_c0_g1	FTC	FT	171.153	0	114.102	23.1661	4.20649	5.50722	3.65×10^-08	2.76×10^-06
TRINITY_DN1856_c2_g1	FTC	FT	171.627	0	114.418	23.1649	4.20649	5.50695	3.65×10^-08	2.76×10^-06
TRINITY_DN6431_c2_g1	FTC	FT	170.686	0	113.79	23.1635	4.20649	5.50661	3.66×10^-08	2.76×10^-06
TRINITY_DN1550_c4_g1	FTC	FT	170.642	0	113.761	23.1624	4.20649	5.50635	3.66×10^-08	2.76×10^-06
TRINITY_DN124752_c0_g1	FTC	FT	170.34	0	113.56	23.1598	4.20649	5.50573	3.68×10^-08	2.77×10^-06
TRINITY_DN79639_c5_g1	FTC	FT	170.397	0	113.598	23.1579	4.20649	5.50529	3.69×10^-08	2.77×10^-06
TRINITY_DN4557_c4_g1	FTC	FT	170.032	0	113.354	23.1576	4.20649	5.50521	3.69×10^-08	2.77×10^-06
TRINITY_DN2986_c0_g1	FTC	FT	997.25	40.9134	678.471	4.60788	0.837033	5.50502	3.69×10^-08	2.77×10^-06
TRINITY_DN2598_c10_g1	FTC	FT	172.612	0	115.075	23.1547	4.20648	5.50453	3.70×10^-08	2.78×10^-06
TRINITY_DN39070_c0_g1	FTC	FT	170.217	0	113.478	23.1534	4.20649	5.50422	3.71×10^-08	2.78×10^-06
TRINITY_DN53824_c1_g1	FTC	FT	169.848	0	113.232	23.1496	4.20649	5.5033	3.73×10^-08	2.79×10^-06
TRINITY_DN30081_c0_g2	FTC	FT	173.708	0	115.805	23.1463	4.20648	5.50253	3.74×10^-08	2.80×10^-06
TRINITY_DN5717_c0_g1	FTC	FT	168.345	0	112.23	23.1433	4.2065	5.50181	3.76×10^-08	2.81×10^-06
TRINITY_DN5044_c4_g1	FTC	FT	168.688	0	112.458	23.1414	4.20649	5.50135	3.77×10^-08	2.81×10^-06
TRINITY_DN11155_c0_g4	FTC	FT	167.897	0	111.931	23.14	4.2065	5.50101	3.78×10^-08	2.81×10^-06
TRINITY_DN4345_c0_g2	FTC	FT	0	275.123	91.7077	-10.2595	1.86504	-5.50097	3.78×10^-08	2.81×10^-06
TRINITY_DN2559_c7_g1	FTC	FT	167.867	0	111.912	23.1395	4.2065	5.5009	3.78×10^-08	2.81×10^-06
TRINITY_DN18232_c0_g1	FTC	FT	167.716	0	111.811	23.1387	4.2065	5.50072	3.78×10^-08	2.81×10^-06
TRINITY_DN26786_c8_g1	FTC	FT	167.69	0	111.793	23.1371	4.2065	5.50032	3.79×10^-08	2.81×10^-06
TRINITY_DN4314_c0_g1	FTC	FT	271.528	756.357	433.137	-1.47353	0.267923	-5.49985	3.80×10^-08	2.82×10^-06
TRINITY_DN12526_c0_g4	FTC	FT	167.445	0	111.63	23.1342	4.2065	5.49962	3.81×10^-08	2.82×10^-06
TRINITY_DN58950_c0_g3	FTC	FT	106.073	0	70.7154	9.79828	1.78165	5.49956	3.81×10^-08	2.82×10^-06
TRINITY_DN4652_c1_g1	FTC	FT	167.062	0	111.375	23.1337	4.2065	5.49952	3.81×10^-08	2.82×10^-06
TRINITY_DN16648_c3_g1	FTC	FT	166.773	0	111.182	23.1313	4.2065	5.49895	3.82×10^-08	2.82×10^-06
TRINITY_DN12132_c5_g1	FTC	FT	166.659	0	111.106	23.1294	4.2065	5.49849	3.83×10^-08	2.83×10^-06
TRINITY_DN82936_c4_g1	FTC	FT	166.433	0	110.955	23.1265	4.2065	5.4978	3.85×10^-08	2.83×10^-06
TRINITY_DN49613_c2_g1	FTC	FT	166.105	0	110.737	23.1257	4.2065	5.49762	3.85×10^-08	2.83×10^-06
TRINITY_DN28970_c3_g1	FTC	FT	166.379	0	110.919	23.1234	4.2065	5.49706	3.86×10^-08	2.84×10^-06
TRINITY_DN66825_c0_g2	FTC	FT	213.542	0	142.361	23.1185	4.2064	5.49603	3.88×10^-08	2.85×10^-06
TRINITY_DN6294_c1_g1	FTC	FT	0.796149	116.237	39.2763	-7.53535	1.37113	-5.49574	3.89×10^-08	2.86×10^-06
TRINITY_DN54005_c0_g1	FTC	FT	191.704	0	127.803	23.1149	4.20644	5.49511	3.90×10^-08	2.86×10^-06
TRINITY_DN33587_c0_g1	FTC	FT	165.081	0	110.054	23.1146	4.2065	5.49498	3.91×10^-08	2.86×10^-06
TRINITY_DN6241_c0_g2	FTC	FT	5.32392	95.1661	35.2713	-4.09239	0.744838	-5.49434	3.92×10^-08	2.87×10^-06
TRINITY_DN33891_c4_g1	FTC	FT	164.565	0	109.71	23.1112	4.20651	5.49415	3.93×10^-08	2.87×10^-06
TRINITY_DN3589_c4_g1	FTC	FT	164.347	0	109.565	23.111	4.20651	5.4941	3.93×10^-08	2.87×10^-06
TRINITY_DN77593_c0_g1	FTC	FT	164.37	0	109.58	23.1105	4.20651	5.49398	3.93×10^-08	2.87×10^-06
TRINITY_DN11858_c0_g1	FTC	FT	164.364	0	109.576	23.11	4.20651	5.49387	3.93×10^-08	2.87×10^-06
TRINITY_DN23749_c0_g1	FTC	FT	163.911	0	109.274	23.1061	4.20651	5.49295	3.95×10^-08	2.88×10^-06
TRINITY_DN69667_c5_g1	FTC	FT	164.104	0	109.403	23.1046	4.20651	5.49259	3.96×10^-08	2.88×10^-06
TRINITY_DN125_c1_g1	FTC	FT	3202.25	881.724	2428.74	1.86042	0.338754	5.49196	3.97×10^-08	2.89×10^-06
TRINITY_DN595_c4_g1	FTC	FT	164.853	0	109.902	23.1014	4.20651	5.49183	3.98×10^-08	2.89×10^-06
TRINITY_DN50358_c0_g1	FTC	FT	164.056	0	109.371	23.0998	4.20651	5.49144	3.99×10^-08	2.89×10^-06
TRINITY_DN4372_c8_g1	FTC	FT	278.235	0	185.49	23.0982	4.20631	5.49132	3.99×10^-08	2.89×10^-06
TRINITY_DN11344_c5_g1	FTC	FT	177.685	0	118.457	23.0976	4.20647	5.49097	4.00×10^-08	2.89×10^-06
TRINITY_DN27143_c2_g1	FTC	FT	162.868	0	108.579	23.0966	4.20651	5.49069	4.00×10^-08	2.89×10^-06
TRINITY_DN3705_c2_g1	FTC	FT	162.868	0	108.579	23.0966	4.20651	5.49069	4.00×10^-08	2.89×10^-06
TRINITY_DN52036_c0_g1	FTC	FT	164.355	0	109.57	23.0947	4.20651	5.49022	4.01×10^-08	2.90×10^-06
TRINITY_DN35153_c0_g2	FTC	FT	162.576	0	108.384	23.0947	4.20651	5.49022	4.01×10^-08	2.90×10^-06
TRINITY_DN112484_c0_g1	FTC	FT	196.152	0	130.768	23.087	4.20643	5.4885	4.05×10^-08	2.92×10^-06
TRINITY_DN21298_c0_g1	FTC	FT	161.372	0	107.582	23.0852	4.20652	5.48797	4.07×10^-08	2.93×10^-06
TRINITY_DN4755_c1_g2	FTC	FT	161.467	0	107.644	23.081	4.20652	5.48696	4.09×10^-08	2.94×10^-06
TRINITY_DN12246_c4_g1	FTC	FT	174.079	0	116.053	23.0789	4.20648	5.48651	4.10×10^-08	2.94×10^-06
TRINITY_DN103955_c1_g1	FTC	FT	160.483	0	106.989	23.0768	4.20652	5.48595	4.11×10^-08	2.94×10^-06
TRINITY_DN19835_c0_g2	FTC	FT	160.483	0	106.989	23.0768	4.20652	5.48595	4.11×10^-08	2.94×10^-06
TRINITY_DN7015_c4_g1	FTC	FT	41.9783	1.25882	28.4052	5.02605	0.916184	5.48585	4.11×10^-08	2.94×10^-06
TRINITY_DN21431_c1_g1	FTC	FT	165.84	0	110.56	23.0758	4.2065	5.48575	4.12×10^-08	2.94×10^-06
TRINITY_DN63354_c0_g2	FTC	FT	160.352	0	106.901	23.0756	4.20652	5.48567	4.12×10^-08	2.94×10^-06
TRINITY_DN33496_c2_g1	FTC	FT	355.831	0	237.22	23.0736	4.20625	5.48555	4.12×10^-08	2.94×10^-06
TRINITY_DN110723_c0_g1	FTC	FT	160.139	0	106.76	23.0738	4.20652	5.48526	4.13×10^-08	2.94×10^-06
TRINITY_DN12066_c1_g2	FTC	FT	159.954	0	106.636	23.073	4.20652	5.48506	4.13×10^-08	2.94×10^-06
TRINITY_DN29277_c1_g1	FTC	FT	12.6677	138.649	54.6615	-3.44157	0.627447	-5.48504	4.13×10^-08	2.94×10^-06
TRINITY_DN5312_c6_g1	FTC	FT	159.859	0	106.573	23.0712	4.20652	5.48463	4.14×10^-08	2.95×10^-06
TRINITY_DN4258_c1_g2	FTC	FT	217.858	0	145.239	23.0692	4.20639	5.48432	4.15×10^-08	2.95×10^-06
TRINITY_DN20474_c2_g1	FTC	FT	159.638	0	106.425	23.0698	4.20652	5.4843	4.15×10^-08	2.95×10^-06
TRINITY_DN48275_c0_g1	FTC	FT	159.636	0	106.424	23.069	4.20652	5.48412	4.16×10^-08	2.95×10^-06
TRINITY_DN12480_c1_g1	FTC	FT	159.115	0	106.076	23.0653	4.20652	5.48323	4.18×10^-08	2.96×10^-06
TRINITY_DN67777_c4_g1	FTC	FT	220.425	0	146.95	23.0644	4.20639	5.4832	4.18×10^-08	2.96×10^-06
TRINITY_DN7052_c1_g1	FTC	FT	158.635	0	105.757	23.0614	4.20652	5.48228	4.20×10^-08	2.97×10^-06
TRINITY_DN99278_c5_g1	FTC	FT	159.302	0	106.202	23.058	4.20652	5.48148	4.22×10^-08	2.98×10^-06
TRINITY_DN148_c0_g1	FTC	FT	15819	16.8048	10551.6	9.87853	1.80218	5.48143	4.22×10^-08	2.98×10^-06
TRINITY_DN60776_c0_g2	FTC	FT	271.182	0	180.788	23.056	4.20632	5.48128	4.22×10^-08	2.98×10^-06
TRINITY_DN27590_c1_g3	FTC	FT	158.081	0	105.387	23.0559	4.20653	5.48099	4.23×10^-08	2.98×10^-06
TRINITY_DN61505_c0_g1	FTC	FT	157.858	0	105.239	23.0521	4.20653	5.48007	4.25×10^-08	2.99×10^-06
TRINITY_DN38592_c0_g1	FTC	FT	0.458334	640.629	213.848	-10.1177	1.8463	-5.48001	4.25×10^-08	2.99×10^-06
TRINITY_DN13896_c0_g1	FTC	FT	203.553	0	135.702	23.0498	4.20642	5.47968	4.26×10^-08	2.99×10^-06
TRINITY_DN4667_c2_g1	FTC	FT	157.152	0	104.768	23.0479	4.20653	5.47908	4.28×10^-08	3.00×10^-06
TRINITY_DN6798_c0_g4	FTC	FT	224.947	0	149.964	23.0463	4.20638	5.47889	4.28×10^-08	3.00×10^-06
TRINITY_DN3769_c3_g1	FTC	FT	157.093	0	104.729	23.0443	4.20653	5.47821	4.30×10^-08	3.01×10^-06
TRINITY_DN21476_c0_g5	FTC	FT	156.595	0	104.397	23.0421	4.20653	5.4777	4.31×10^-08	3.01×10^-06
TRINITY_DN11359_c0_g1	FTC	FT	0	227.777	75.9255	-9.98709	1.82326	-5.47761	4.31×10^-08	3.01×10^-06
TRINITY_DN85649_c0_g1	FTC	FT	156.865	0	104.576	23.0414	4.20653	5.47754	4.31×10^-08	3.01×10^-06
TRINITY_DN7369_c0_g1	FTC	FT	43.5166	162.124	83.0523	-1.91208	0.349086	-5.47738	4.32×10^-08	3.01×10^-06
TRINITY_DN106610_c0_g1	FTC	FT	156.167	0	104.112	23.0388	4.20653	5.47692	4.33×10^-08	3.02×10^-06
TRINITY_DN2451_c0_g1	FTC	FT	155.793	0	103.862	23.0365	4.20653	5.47636	4.34×10^-08	3.02×10^-06
TRINITY_DN63461_c0_g1	FTC	FT	156.279	0	104.186	23.0354	4.20653	5.4761	4.35×10^-08	3.03×10^-06
TRINITY_DN53045_c4_g1	FTC	FT	155.546	0	103.697	23.0337	4.20653	5.47571	4.36×10^-08	3.03×10^-06
TRINITY_DN1538_c3_g2	FTC	FT	207.778	0	138.519	23.0326	4.20641	5.47559	4.36×10^-08	3.03×10^-06
TRINITY_DN25022_c0_g3	FTC	FT	179.022	0	119.348	23.032	4.20647	5.47537	4.37×10^-08	3.03×10^-06
TRINITY_DN18318_c6_g1	FTC	FT	155.526	0	103.684	23.0323	4.20653	5.47537	4.37×10^-08	3.03×10^-06
TRINITY_DN61969_c1_g1	FTC	FT	155.276	0	103.517	23.0305	4.20653	5.47493	4.38×10^-08	3.03×10^-06
TRINITY_DN69905_c0_g2	FTC	FT	155.276	0	103.517	23.0305	4.20653	5.47493	4.38×10^-08	3.03×10^-06
TRINITY_DN11155_c0_g3	FTC	FT	155.272	0	103.515	23.0287	4.20653	5.4745	4.39×10^-08	3.03×10^-06
TRINITY_DN38070_c0_g1	FTC	FT	245.14	0	163.427	23.0261	4.20635	5.47414	4.40×10^-08	3.03×10^-06
TRINITY_DN13018_c7_g1	FTC	FT	154.756	0	103.171	23.0267	4.20654	5.47403	4.40×10^-08	3.03×10^-06
TRINITY_DN18284_c5_g1	FTC	FT	154.637	0	103.092	23.024	4.20654	5.47338	4.42×10^-08	3.04×10^-06
TRINITY_DN120808_c3_g1	FTC	FT	155.297	0	103.531	23.021	4.20653	5.47268	4.43×10^-08	3.05×10^-06
TRINITY_DN14272_c5_g1	FTC	FT	155.297	0	103.531	23.021	4.20653	5.47268	4.43×10^-08	3.05×10^-06
TRINITY_DN56887_c2_g1	FTC	FT	154.098	0	102.732	23.0201	4.20654	5.47245	4.44×10^-08	3.05×10^-06
TRINITY_DN15276_c0_g1	FTC	FT	154.364	0	102.91	23.0195	4.20654	5.47232	4.44×10^-08	3.05×10^-06
TRINITY_DN99088_c1_g1	FTC	FT	157.543	0	105.028	23.0176	4.20653	5.47187	4.45×10^-08	3.05×10^-06
TRINITY_DN13205_c0_g1	FTC	FT	0	236.514	78.838	-10.0414	1.83511	-5.47186	4.45×10^-08	3.05×10^-06
TRINITY_DN110028_c2_g1	FTC	FT	154.035	0	102.69	23.0164	4.20654	5.47157	4.46×10^-08	3.05×10^-06
TRINITY_DN12647_c0_g3	FTC	FT	153.529	0	102.353	23.0146	4.20654	5.47115	4.47×10^-08	3.05×10^-06
TRINITY_DN10530_c0_g4	FTC	FT	153.402	0	102.268	23.0138	4.20654	5.47096	4.48×10^-08	3.05×10^-06
TRINITY_DN31225_c1_g1	FTC	FT	154.474	0	102.983	23.0136	4.20654	5.47091	4.48×10^-08	3.05×10^-06
TRINITY_DN3279_c1_g1	FTC	FT	153.747	0	102.498	23.0123	4.20654	5.4706	4.49×10^-08	3.05×10^-06
TRINITY_DN7417_c1_g1	FTC	FT	153.747	0	102.498	23.0123	4.20654	5.4706	4.49×10^-08	3.05×10^-06
TRINITY_DN2850_c3_g1	FTC	FT	153.114	0	102.076	23.0116	4.20654	5.47043	4.49×10^-08	3.05×10^-06
TRINITY_DN89164_c1_g1	FTC	FT	163.29	0	108.86	23.0107	4.20651	5.47027	4.49×10^-08	3.05×10^-06
TRINITY_DN102747_c1_g1	FTC	FT	153.102	0	102.068	23.0107	4.20654	5.47023	4.49×10^-08	3.05×10^-06
TRINITY_DN1769_c5_g1	FTC	FT	37.916	0	25.2773	8.31118	1.51946	5.46984	4.50×10^-08	3.06×10^-06
TRINITY_DN6480_c4_g5	FTC	FT	152.766	0	101.844	23.008	4.20654	5.46958	4.51×10^-08	3.06×10^-06
TRINITY_DN9674_c7_g1	FTC	FT	152.717	0	101.811	23.0071	4.20654	5.46935	4.52×10^-08	3.06×10^-06
TRINITY_DN2499_c1_g3	FTC	FT	153.41	0	102.274	23.005	4.20654	5.46886	4.53×10^-08	3.07×10^-06
TRINITY_DN44263_c0_g1	FTC	FT	0	221.636	73.8788	-9.94767	1.81964	-5.46684	4.58×10^-08	3.10×10^-06
TRINITY_DN48211_c1_g2	FTC	FT	151.226	0	100.817	22.9941	4.20655	5.46627	4.60×10^-08	3.10×10^-06
TRINITY_DN6596_c4_g1	FTC	FT	151.226	0	100.817	22.9941	4.20655	5.46627	4.60×10^-08	3.10×10^-06
TRINITY_DN1078_c7_g1	FTC	FT	270.778	0	180.518	22.9881	4.20632	5.46513	4.63×10^-08	3.11×10^-06
TRINITY_DN125886_c0_g2	FTC	FT	270.778	0	180.518	22.9881	4.20632	5.46513	4.63×10^-08	3.11×10^-06
TRINITY_DN34956_c0_g1	FTC	FT	150.584	0	100.389	22.9886	4.20655	5.46495	4.63×10^-08	3.11×10^-06
TRINITY_DN58964_c2_g1	FTC	FT	150.522	0	100.348	22.988	4.20655	5.46481	4.63×10^-08	3.11×10^-06
TRINITY_DN73473_c0_g1	FTC	FT	150.522	0	100.348	22.988	4.20655	5.46481	4.63×10^-08	3.11×10^-06
TRINITY_DN127668_c0_g1	FTC	FT	150.493	0	100.329	22.9867	4.20655	5.46451	4.64×10^-08	3.12×10^-06
TRINITY_DN10029_c1_g2	FTC	FT	0.238445	108.219	36.232	-8.192	1.49939	-5.46354	4.67×10^-08	3.13×10^-06
TRINITY_DN27894_c1_g1	FTC	FT	425.778	10911.5	3921	-4.67903	0.856425	-5.46344	4.67×10^-08	3.13×10^-06
TRINITY_DN42228_c0_g1	FTC	FT	150.11	0	100.074	22.9813	4.20655	5.46322	4.68×10^-08	3.13×10^-06
TRINITY_DN131463_c1_g1	FTC	FT	149.834	0	99.8893	22.9813	4.20655	5.4632	4.68×10^-08	3.13×10^-06
TRINITY_DN1143_c2_g3	FTC	FT	161.5	0	107.666	22.9803	4.20652	5.46303	4.68×10^-08	3.13×10^-06
TRINITY_DN30177_c4_g1	FTC	FT	149.51	0	99.6736	22.9778	4.20655	5.46238	4.70×10^-08	3.14×10^-06
TRINITY_DN120609_c3_g1	FTC	FT	150.291	0	100.194	22.977	4.20655	5.4622	4.70×10^-08	3.14×10^-06
TRINITY_DN63512_c1_g1	FTC	FT	149.275	0	99.5168	22.9759	4.20655	5.46193	4.71×10^-08	3.14×10^-06
TRINITY_DN7080_c4_g1	FTC	FT	149.126	0	99.4176	22.9743	4.20656	5.46154	4.72×10^-08	3.14×10^-06
TRINITY_DN379_c1_g2	FTC	FT	148.969	0	99.3125	22.9734	4.20656	5.46133	4.73×10^-08	3.14×10^-06
TRINITY_DN14850_c2_g1	FTC	FT	150.133	0	100.089	22.9729	4.20655	5.46122	4.73×10^-08	3.14×10^-06
TRINITY_DN17918_c0_g2	FTC	FT	148.725	0	99.1502	22.9711	4.20656	5.46079	4.74×10^-08	3.14×10^-06
TRINITY_DN20673_c0_g1	FTC	FT	148.725	0	99.1502	22.9711	4.20656	5.46079	4.74×10^-08	3.14×10^-06
TRINITY_DN21415_c1_g1	FTC	FT	149.353	0	99.5689	22.9707	4.20655	5.46069	4.74×10^-08	3.14×10^-06
TRINITY_DN15326_c2_g1	FTC	FT	184.915	0	123.276	22.9668	4.20645	5.4599	4.76×10^-08	3.16×10^-06
TRINITY_DN8641_c1_g1	FTC	FT	148.043	0	98.6951	22.964	4.20656	5.45909	4.79×10^-08	3.17×10^-06
TRINITY_DN57601_c0_g5	FTC	FT	147.266	0	98.1775	22.9571	4.20656	5.45745	4.83×10^-08	3.19×10^-06
TRINITY_DN4214_c3_g1	FTC	FT	147.351	0	98.2343	22.9569	4.20656	5.45741	4.83×10^-08	3.19×10^-06
TRINITY_DN35198_c0_g1	FTC	FT	147.091	0	98.0606	22.9559	4.20656	5.45717	4.84×10^-08	3.19×10^-06
TRINITY_DN45952_c0_g2	FTC	FT	147.031	0	98.0204	22.9544	4.20656	5.4568	4.85×10^-08	3.20×10^-06
TRINITY_DN2571_c7_g1	FTC	FT	147.11	0	98.0733	22.9531	4.20656	5.4565	4.86×10^-08	3.20×10^-06
TRINITY_DN35956_c0_g2	FTC	FT	146.634	0	97.7558	22.9516	4.20656	5.45615	4.87×10^-08	3.20×10^-06
TRINITY_DN5396_c4_g1	FTC	FT	146.634	0	97.7558	22.9516	4.20656	5.45615	4.87×10^-08	3.20×10^-06
TRINITY_DN57512_c0_g1	FTC	FT	146.634	0	97.7558	22.9516	4.20656	5.45615	4.87×10^-08	3.20×10^-06
TRINITY_DN10830_c1_g2	FTC	FT	0.40428	107.914	36.241	-8.18793	1.50074	-5.45594	4.87×10^-08	3.20×10^-06
TRINITY_DN38790_c8_g1	FTC	FT	146.177	0	97.4512	22.9472	4.20657	5.45509	4.89×10^-08	3.21×10^-06
TRINITY_DN39593_c0_g1	FTC	FT	145.764	0	97.1761	22.9435	4.20657	5.45422	4.92×10^-08	3.22×10^-06
TRINITY_DN29157_c1_g1	FTC	FT	145.772	0	97.1811	22.943	4.20657	5.4541	4.92×10^-08	3.22×10^-06
TRINITY_DN56796_c2_g1	FTC	FT	0	547.182	182.394	-11.2515	2.06329	-5.45317	4.95×10^-08	3.24×10^-06
TRINITY_DN5196_c8_g1	FTC	FT	181.171	0	120.781	22.9365	4.20646	5.45268	4.96×10^-08	3.24×10^-06
TRINITY_DN50543_c0_g1	FTC	FT	144.834	0	96.5563	22.9347	4.20657	5.45212	4.98×10^-08	3.25×10^-06
TRINITY_DN5073_c7_g1	FTC	FT	144.891	0	96.594	22.9342	4.20657	5.452	4.98×10^-08	3.25×10^-06
TRINITY_DN3249_c3_g2	FTC	FT	144.282	0	96.1879	22.9297	4.20657	5.45093	5.01×10^-08	3.26×10^-06
TRINITY_DN15855_c0_g1	FTC	FT	144.605	0	96.4033	22.9296	4.20657	5.45089	5.01×10^-08	3.26×10^-06
TRINITY_DN4508_c0_g1	FTC	FT	201.703	2.94239	135.45	6.10224	1.11954	5.45066	5.02×10^-08	3.26×10^-06
TRINITY_DN127735_c0_g1	FTC	FT	144.225	0	96.1503	22.9281	4.20657	5.45055	5.02×10^-08	3.26×10^-06
TRINITY_DN2679_c1_g1	FTC	FT	167.603	1006.44	447.216	-2.58525	0.474382	-5.44973	5.04×10^-08	3.28×10^-06
TRINITY_DN104341_c0_g3	FTC	FT	144.058	0	96.0386	22.9237	4.20657	5.44949	5.05×10^-08	3.28×10^-06
TRINITY_DN8049_c5_g1	FTC	FT	143.583	0	95.7219	22.9187	4.20658	5.4483	5.09×10^-08	3.30×10^-06
TRINITY_DN101625_c0_g2	FTC	FT	143.062	0	95.3748	22.917	4.20658	5.4479	5.10×10^-08	3.30×10^-06
TRINITY_DN29660_c5_g1	FTC	FT	143.293	0	95.5284	22.9158	4.20658	5.4476	5.11×10^-08	3.30×10^-06
TRINITY_DN63180_c0_g2	FTC	FT	143.293	0	95.5284	22.9158	4.20658	5.4476	5.11×10^-08	3.30×10^-06
TRINITY_DN39769_c0_g1	FTC	FT	143.045	0	95.3631	22.9156	4.20658	5.44756	5.11×10^-08	3.30×10^-06
TRINITY_DN33363_c1_g1	FTC	FT	180.249	0	120.166	22.9118	4.20647	5.44681	5.13×10^-08	3.31×10^-06
TRINITY_DN8924_c5_g1	FTC	FT	142.619	0	95.0793	22.9124	4.20658	5.4468	5.13×10^-08	3.31×10^-06
TRINITY_DN45846_c0_g1	FTC	FT	153.826	0	102.55	22.9114	4.20654	5.44662	5.13×10^-08	3.31×10^-06
TRINITY_DN15058_c7_g1	FTC	FT	143.425	0	95.6168	22.9104	4.20658	5.44633	5.14×10^-08	3.31×10^-06
TRINITY_DN267_c10_g1	FTC	FT	143.003	0	95.3354	22.907	4.20658	5.44551	5.17×10^-08	3.31×10^-06
TRINITY_DN5211_c1_g1	FTC	FT	143.003	0	95.3354	22.907	4.20658	5.44551	5.17×10^-08	3.31×10^-06
TRINITY_DN88830_c0_g1	FTC	FT	143.003	0	95.3354	22.907	4.20658	5.44551	5.17×10^-08	3.31×10^-06
TRINITY_DN6482_c0_g1	FTC	FT	141.942	0	94.6277	22.9069	4.20658	5.44549	5.17×10^-08	3.31×10^-06
TRINITY_DN25458_c0_g1	FTC	FT	141.842	0	94.5616	22.9057	4.20658	5.44521	5.17×10^-08	3.32×10^-06
TRINITY_DN80159_c0_g1	FTC	FT	141.592	0	94.3948	22.8965	4.20658	5.44302	5.24×10^-08	3.35×10^-06
TRINITY_DN23743_c0_g1	FTC	FT	387.105	0	258.07	22.8941	4.20623	5.44291	5.24×10^-08	3.35×10^-06
TRINITY_DN10324_c0_g1	FTC	FT	0	216.715	72.2383	-9.91529	1.82175	-5.44273	5.25×10^-08	3.35×10^-06
TRINITY_DN5490_c2_g1	FTC	FT	22.5564	124.368	56.4937	-2.46736	0.453354	-5.44245	5.26×10^-08	3.35×10^-06
TRINITY_DN73620_c4_g1	FTC	FT	142.003	0	94.669	22.894	4.20658	5.44241	5.26×10^-08	3.35×10^-06
TRINITY_DN7256_c2_g1	FTC	FT	140.674	0	93.7825	22.893	4.20659	5.44217	5.26×10^-08	3.36×10^-06
TRINITY_DN49030_c0_g2	FTC	FT	140.662	0	93.7746	22.8896	4.20659	5.44137	5.29×10^-08	3.37×10^-06
TRINITY_DN48148_c3_g1	FTC	FT	54.3277	5.80475	38.1534	3.23677	0.594859	5.44124	5.29×10^-08	3.37×10^-06
TRINITY_DN44043_c1_g1	FTC	FT	140.629	0	93.7529	22.8887	4.20659	5.44116	5.29×10^-08	3.37×10^-06
TRINITY_DN25689_c0_g3	FTC	FT	140.067	0	93.3783	22.8874	4.20659	5.44083	5.30×10^-08	3.37×10^-06
TRINITY_DN103009_c0_g1	FTC	FT	140.504	0	93.669	22.8841	4.20659	5.44006	5.33×10^-08	3.38×10^-06
TRINITY_DN11083_c1_g2	FTC	FT	139.616	0	93.077	22.8835	4.20659	5.43992	5.33×10^-08	3.38×10^-06
TRINITY_DN1742_c3_g1	FTC	FT	139.616	0	93.077	22.8835	4.20659	5.43992	5.33×10^-08	3.38×10^-06
TRINITY_DN33440_c1_g1	FTC	FT	139.575	0	93.0499	22.8829	4.20659	5.43977	5.33×10^-08	3.38×10^-06
TRINITY_DN34019_c6_g1	FTC	FT	139.186	0	92.7906	22.8778	4.20659	5.43855	5.37×10^-08	3.39×10^-06
TRINITY_DN4144_c9_g1	FTC	FT	139.712	0	93.1411	22.8771	4.20659	5.4384	5.38×10^-08	3.39×10^-06
TRINITY_DN3590_c9_g1	FTC	FT	139.615	0	93.0768	22.8771	4.20659	5.4384	5.38×10^-08	3.39×10^-06
TRINITY_DN77630_c0_g1	FTC	FT	52.1989	0	34.7992	8.76593	1.61199	5.43795	5.39×10^-08	3.40×10^-06
TRINITY_DN45326_c6_g1	FTC	FT	138.924	0	92.6158	22.8718	4.20659	5.43713	5.41×10^-08	3.41×10^-06
TRINITY_DN10944_c2_g2	FTC	FT	0	233.972	77.9908	-10.0258	1.84413	-5.4366	5.43×10^-08	3.42×10^-06
TRINITY_DN4844_c2_g1	FTC	FT	9.21985	195.967	71.4689	-4.36444	0.80315	-5.43416	5.51×10^-08	3.46×10^-06
TRINITY_DN499_c8_g1	FTC	FT	262.029	0	174.686	22.8569	4.20633	5.43394	5.51×10^-08	3.46×10^-06
TRINITY_DN45935_c0_g1	FTC	FT	92.3255	0	61.5503	9.59361	1.76563	5.43353	5.53×10^-08	3.47×10^-06
TRINITY_DN57704_c0_g1	FTC	FT	136.872	0	91.2481	22.8546	4.2066	5.43304	5.54×10^-08	3.48×10^-06
TRINITY_DN13771_c2_g1	FTC	FT	136.53	0	91.0199	22.8519	4.2066	5.43239	5.56×10^-08	3.49×10^-06
TRINITY_DN19878_c0_g1	FTC	FT	41.029	0	27.3527	8.43451	1.55282	5.43172	5.58×10^-08	3.50×10^-06
TRINITY_DN22479_c0_g3	FTC	FT	46.0074	0	30.6716	8.59265	1.58219	5.43087	5.61×10^-08	3.51×10^-06
TRINITY_DN3890_c0_g1	FTC	FT	197.246	519.1	304.53	-1.39811	0.257442	-5.43076	5.61×10^-08	3.51×10^-06
TRINITY_DN4382_c1_g2	FTC	FT	250.045	0	166.697	22.842	4.20634	5.43038	5.62×10^-08	3.51×10^-06
TRINITY_DN1222_c4_g1	FTC	FT	135.535	0	90.3568	22.8419	4.20661	5.42999	5.64×10^-08	3.52×10^-06
TRINITY_DN438_c0_g2	FTC	FT	135.429	0	90.2862	22.8378	4.20661	5.42904	5.67×10^-08	3.53×10^-06
TRINITY_DN12815_c0_g2	FTC	FT	173.88	0	115.92	10.5101	1.93597	5.42888	5.67×10^-08	3.53×10^-06
TRINITY_DN1592_c1_g1	FTC	FT	244.232	0	162.821	22.8349	4.20635	5.42868	5.68×10^-08	3.53×10^-06
TRINITY_DN18798_c0_g1	FTC	FT	134.982	0	89.988	22.835	4.20661	5.42836	5.69×10^-08	3.54×10^-06
TRINITY_DN1159_c2_g1	FTC	FT	135.305	0	90.2031	22.8339	4.20661	5.4281	5.70×10^-08	3.54×10^-06
TRINITY_DN23629_c0_g1	FTC	FT	288.451	0	192.301	22.8307	4.2063	5.42773	5.71×10^-08	3.54×10^-06
TRINITY_DN97861_c1_g1	FTC	FT	136.12	0	90.7469	22.8321	4.20661	5.42768	5.71×10^-08	3.54×10^-06
TRINITY_DN14496_c0_g1	FTC	FT	133.923	0	89.2822	22.825	4.20661	5.42598	5.76×10^-08	3.57×10^-06
TRINITY_DN3978_c0_g8	FTC	FT	133.923	0	89.2822	22.825	4.20661	5.42598	5.76×10^-08	3.57×10^-06
TRINITY_DN87907_c0_g1	FTC	FT	133.841	0	89.2273	22.8212	4.20662	5.42508	5.79×10^-08	3.59×10^-06
TRINITY_DN4224_c9_g1	FTC	FT	0	270.16	90.0534	-10.2333	1.88644	-5.42468	5.81×10^-08	3.59×10^-06
TRINITY_DN5410_c7_g1	FTC	FT	132.936	0	88.6237	22.8147	4.20662	5.42351	5.84×10^-08	3.61×10^-06
TRINITY_DN105_c4_g1	FTC	FT	132.804	0	88.5363	22.8129	4.20662	5.42309	5.86×10^-08	3.62×10^-06
TRINITY_DN47895_c1_g1	FTC	FT	132.549	0	88.3661	22.8082	4.20662	5.42198	5.89×10^-08	3.63×10^-06
TRINITY_DN22427_c1_g4	FTC	FT	132.38	0	88.2531	22.8081	4.20662	5.42195	5.90×10^-08	3.63×10^-06
TRINITY_DN38041_c0_g2	FTC	FT	132.329	0	88.2191	22.8065	4.20662	5.42158	5.91×10^-08	3.64×10^-06
TRINITY_DN27881_c4_g1	FTC	FT	173.602	0	115.735	22.8052	4.20648	5.42145	5.91×10^-08	3.64×10^-06
TRINITY_DN52509_c1_g2	FTC	FT	0.935224	97.1143	32.9949	-6.46357	1.19252	-5.42009	5.96×10^-08	3.66×10^-06
TRINITY_DN33304_c1_g1	FTC	FT	2.68095	127.865	44.409	-5.66245	1.04486	-5.41933	5.98×10^-08	3.67×10^-06
TRINITY_DN26186_c1_g1	FTC	FT	131.207	0	87.4713	22.7969	4.20663	5.41928	5.98×10^-08	3.67×10^-06
TRINITY_DN8016_c6_g1	FTC	FT	0.621036	81.522	27.588	-7.07931	1.30639	-5.41899	5.99×10^-08	3.67×10^-06
TRINITY_DN21108_c0_g5	FTC	FT	131.466	0	87.6443	22.7955	4.20663	5.41894	6.00×10^-08	3.67×10^-06
TRINITY_DN35523_c0_g1	FTC	FT	232.466	0	154.977	22.7871	4.20637	5.41728	6.05×10^-08	3.70×10^-06
TRINITY_DN9481_c1_g2	FTC	FT	232.466	0	154.977	22.7871	4.20637	5.41728	6.05×10^-08	3.70×10^-06
TRINITY_DN97890_c0_g1	FTC	FT	131.323	0	87.5486	22.7866	4.20663	5.41683	6.07×10^-08	3.71×10^-06
TRINITY_DN36314_c0_g1	FTC	FT	130.006	0	86.6709	22.7824	4.20663	5.41582	6.10×10^-08	3.72×10^-06
TRINITY_DN17366_c0_g1	FTC	FT	57.8411	0	38.5608	8.91516	1.64614	5.41579	6.10×10^-08	3.72×10^-06
TRINITY_DN16177_c6_g1	FTC	FT	129.376	0	86.2509	22.7771	4.20664	5.41456	6.14×10^-08	3.75×10^-06
TRINITY_DN124671_c0_g1	FTC	FT	129.226	0	86.1507	22.7757	4.20664	5.41423	6.16×10^-08	3.75×10^-06
TRINITY_DN128502_c0_g1	FTC	FT	207.07	0	138.046	22.7734	4.20641	5.41397	6.16×10^-08	3.75×10^-06
TRINITY_DN35515_c8_g1	FTC	FT	251.658	0	167.772	22.7722	4.20634	5.41377	6.17×10^-08	3.75×10^-06
TRINITY_DN843_c3_g2	FTC	FT	150.695	0	100.464	22.7728	4.20655	5.41365	6.18×10^-08	3.75×10^-06
TRINITY_DN22617_c0_g1	FTC	FT	1191.26	3.51177	795.343	8.40411	1.55242	5.41357	6.18×10^-08	3.75×10^-06
TRINITY_DN7016_c0_g1	FTC	FT	18.7126	217.835	85.0868	-3.50997	0.648379	-5.41344	6.18×10^-08	3.75×10^-06
TRINITY_DN1880_c3_g1	FTC	FT	8.28982	88.2008	34.9268	-3.39315	0.626822	-5.41326	6.19×10^-08	3.75×10^-06
TRINITY_DN349_c4_g1	FTC	FT	128.943	0	85.9617	22.7713	4.20664	5.41319	6.19×10^-08	3.75×10^-06
TRINITY_DN26487_c3_g1	FTC	FT	129.191	0	86.1272	22.7706	4.20664	5.41303	6.20×10^-08	3.75×10^-06
TRINITY_DN92803_c4_g1	FTC	FT	128.474	0	85.6497	22.7673	4.20664	5.41224	6.22×10^-08	3.76×10^-06
TRINITY_DN21835_c2_g1	FTC	FT	128.373	0	85.582	22.7658	4.20664	5.41187	6.24×10^-08	3.77×10^-06
TRINITY_DN63691_c0_g1	FTC	FT	128.293	0	85.5288	22.7648	4.20664	5.41163	6.25×10^-08	3.77×10^-06
TRINITY_DN17089_c0_g1	FTC	FT	128.5	0	85.6664	22.7622	4.20664	5.41102	6.27×10^-08	3.78×10^-06
TRINITY_DN101893_c0_g1	FTC	FT	36.2631	0	24.1754	8.25058	1.52483	5.41081	6.27×10^-08	3.78×10^-06
TRINITY_DN3677_c3_g1	FTC	FT	4.32416	108.019	38.8891	-4.71732	0.872025	-5.40961	6.32×10^-08	3.80×10^-06
TRINITY_DN25944_c0_g2	FTC	FT	224.845	0	149.897	22.7527	4.20638	5.40909	6.33×10^-08	3.81×10^-06
TRINITY_DN1743_c5_g1	FTC	FT	8.64005	135.606	50.9619	-3.97799	0.735672	-5.40729	6.40×10^-08	3.85×10^-06
TRINITY_DN14645_c0_g1	FTC	FT	126.362	0	84.2413	22.7438	4.20665	5.40663	6.42×10^-08	3.86×10^-06
TRINITY_DN25290_c4_g1	FTC	FT	143.072	0	95.3815	22.738	4.20658	5.40534	6.47×10^-08	3.88×10^-06
TRINITY_DN56737_c1_g2	FTC	FT	163.667	0	109.111	22.7353	4.20651	5.40479	6.49×10^-08	3.89×10^-06
TRINITY_DN43371_c0_g3	FTC	FT	4.26817	61.5255	23.354	-3.87662	0.717322	-5.4043	6.51×10^-08	3.90×10^-06
TRINITY_DN42559_c2_g1	FTC	FT	125.019	0	83.3457	22.7296	4.20666	5.40324	6.54×10^-08	3.92×10^-06
TRINITY_DN27292_c0_g1	FTC	FT	0	213.843	71.2811	-9.89603	1.83151	-5.40322	6.55×10^-08	3.92×10^-06
TRINITY_DN42857_c0_g2	FTC	FT	125.172	0	83.4477	22.7284	4.20666	5.40297	6.55×10^-08	3.92×10^-06
TRINITY_DN1023_c8_g1	FTC	FT	172.068	0	114.712	22.7227	4.20649	5.40183	6.60×10^-08	3.94×10^-06
TRINITY_DN3286_c0_g1	FTC	FT	2.64244	444.974	150.086	-7.50479	1.38939	-5.40149	6.61×10^-08	3.94×10^-06
TRINITY_DN21643_c6_g1	FTC	FT	261.218	0	174.146	22.7203	4.20633	5.40146	6.61×10^-08	3.94×10^-06
TRINITY_DN2818_c12_g1	FTC	FT	0	626.307	208.769	-11.4463	2.11972	-5.39992	6.67×10^-08	3.97×10^-06
TRINITY_DN4079_c1_g1	FTC	FT	123.1	626.147	290.782	-2.35063	0.435324	-5.39973	6.67×10^-08	3.97×10^-06
TRINITY_DN48919_c0_g1	FTC	FT	557.893	177.297	431.028	1.65435	0.306447	5.3985	6.72×10^-08	4.00×10^-06
TRINITY_DN13393_c4_g1	FTC	FT	54.7389	0	36.4926	8.8398	1.63749	5.39839	6.72×10^-08	4.00×10^-06
TRINITY_DN30303_c2_g1	FTC	FT	237.662	0	158.441	22.6983	4.20636	5.39618	6.81×10^-08	4.04×10^-06
TRINITY_DN38041_c1_g1	FTC	FT	128.189	0	85.4593	22.6996	4.20664	5.39614	6.81×10^-08	4.04×10^-06
TRINITY_DN27364_c5_g1	FTC	FT	46.444	0	30.9626	8.60034	1.59472	5.393	6.93×10^-08	4.10×10^-06
TRINITY_DN47170_c0_g1	FTC	FT	121.183	0	80.7885	22.6852	4.20668	5.39267	6.94×10^-08	4.10×10^-06
TRINITY_DN50853_c0_g2	FTC	FT	121.13	0	80.7533	22.6851	4.20668	5.39265	6.94×10^-08	4.10×10^-06
TRINITY_DN14074_c1_g1	FTC	FT	85.1138	0	56.7426	9.47583	1.75719	5.39262	6.94×10^-08	4.10×10^-06
TRINITY_DN98723_c1_g1	FTC	FT	127.211	0	84.8073	22.6848	4.20665	5.39261	6.94×10^-08	4.10×10^-06
TRINITY_DN9355_c0_g2	FTC	FT	167.444	0	111.629	22.6806	4.2065	5.39179	6.98×10^-08	4.12×10^-06
TRINITY_DN54280_c0_g1	FTC	FT	202.718	0	135.145	22.675	4.20642	5.39056	7.02×10^-08	4.15×10^-06
TRINITY_DN10640_c12_g1	FTC	FT	120.21	0	80.1398	22.6739	4.20668	5.38997	7.05×10^-08	4.16×10^-06
TRINITY_DN32186_c0_g1	FTC	FT	121.484	0	80.9897	22.6588	4.20667	5.3864	7.19×10^-08	4.23×10^-06
TRINITY_DN22429_c0_g1	FTC	FT	3.15784	62.5997	22.9718	-4.36713	0.81078	-5.38633	7.19×10^-08	4.23×10^-06
TRINITY_DN24077_c0_g1	FTC	FT	118.436	0	78.9576	22.6539	4.20669	5.38522	7.24×10^-08	4.26×10^-06
TRINITY_DN392_c1_g1	FTC	FT	379.541	41.2981	266.793	3.20196	0.594621	5.38487	7.25×10^-08	4.26×10^-06
TRINITY_DN5792_c2_g1	FTC	FT	118.18	0	78.7864	22.6506	4.20669	5.38443	7.27×10^-08	4.27×10^-06
TRINITY_DN45805_c0_g1	FTC	FT	37.9557	380.925	152.279	-3.32193	0.617117	-5.38298	7.33×10^-08	4.30×10^-06
TRINITY_DN21803_c0_g4	FTC	FT	0	211.246	70.4152	-9.8784	1.83529	-5.38248	7.35×10^-08	4.30×10^-06
TRINITY_DN2215_c4_g1	FTC	FT	0	383.435	127.812	-10.7385	1.99512	-5.38238	7.35×10^-08	4.30×10^-06
TRINITY_DN30316_c0_g1	FTC	FT	23.8544	102.987	50.2317	-2.12524	0.394852	-5.38237	7.35×10^-08	4.30×10^-06
TRINITY_DN3431_c1_g3	FTC	FT	117.224	0	78.1493	22.6401	4.2067	5.38192	7.37×10^-08	4.31×10^-06
TRINITY_DN10117_c3_g1	FTC	FT	117.112	0	78.0747	22.6342	4.2067	5.38052	7.43×10^-08	4.34×10^-06
TRINITY_DN20028_c0_g4	FTC	FT	15.8681	93.1961	41.6441	-2.58582	0.480613	-5.38025	7.44×10^-08	4.34×10^-06
TRINITY_DN124696_c0_g1	FTC	FT	0	223.381	74.4603	-9.95902	1.85103	-5.38024	7.44×10^-08	4.34×10^-06
TRINITY_DN14293_c1_g1	FTC	FT	0	391.742	130.581	-10.7693	2.00197	-5.37937	7.47×10^-08	4.36×10^-06
TRINITY_DN13924_c1_g2	FTC	FT	5.99027	58.3367	23.4391	-3.29822	0.613218	-5.37854	7.51×10^-08	4.38×10^-06
TRINITY_DN79381_c0_g1	FTC	FT	168.748	0	112.499	22.6234	4.20649	5.37821	7.52×10^-08	4.38×10^-06
TRINITY_DN39741_c4_g1	FTC	FT	116.36	0	77.5734	22.6185	4.2067	5.37678	7.58×10^-08	4.41×10^-06
TRINITY_DN3269_c0_g3	FTC	FT	139.25	0	92.8336	10.1911	1.89545	5.37662	7.59×10^-08	4.41×10^-06
TRINITY_DN132395_c0_g1	FTC	FT	154.866	0	103.244	22.6127	4.20654	5.37562	7.63×10^-08	4.43×10^-06
TRINITY_DN5197_c1_g1	FTC	FT	5.73953	233.381	81.6199	-5.35781	0.996689	-5.37561	7.63×10^-08	4.43×10^-06
TRINITY_DN111_c20_g1	FTC	FT	23.8892	161.016	69.598	-2.74369	0.510494	-5.37459	7.68×10^-08	4.45×10^-06
TRINITY_DN11590_c0_g2	FTC	FT	132.824	0	88.5492	22.6066	4.20662	5.37405	7.70×10^-08	4.46×10^-06
TRINITY_DN1162_c6_g1	FTC	FT	114.443	0	76.2956	22.6061	4.20671	5.37381	7.71×10^-08	4.46×10^-06
TRINITY_DN10943_c6_g1	FTC	FT	243.925	0	162.617	22.5974	4.20635	5.3722	7.78×10^-08	4.50×10^-06
TRINITY_DN6545_c2_g1	FTC	FT	0	209.947	69.9823	-9.8695	1.83721	-5.37201	7.79×10^-08	4.50×10^-06
TRINITY_DN48_c3_g1	FTC	FT	7881.24	1440.83	5734.44	2.45166	0.456384	5.37191	7.79×10^-08	4.50×10^-06
TRINITY_DN18853_c0_g1	FTC	FT	114.037	0	76.025	22.5942	4.20672	5.37098	7.83×10^-08	4.52×10^-06
TRINITY_DN32566_c2_g1	FTC	FT	326.299	0	217.533	22.5898	4.20627	5.3705	7.85×10^-08	4.53×10^-06
TRINITY_DN24034_c0_g5	FTC	FT	0	233.885	77.9618	-10.0253	1.86686	-5.37015	7.87×10^-08	4.53×10^-06
TRINITY_DN37303_c0_g1	FTC	FT	150.718	0	100.478	22.5843	4.20655	5.36883	7.92×10^-08	4.56×10^-06
TRINITY_DN36780_c0_g1	FTC	FT	112.73	0	75.1534	22.585	4.20672	5.36877	7.93×10^-08	4.56×10^-06
TRINITY_DN12465_c0_g2	FTC	FT	112.397	0	74.9315	22.5813	4.20673	5.36791	7.97×10^-08	4.58×10^-06
TRINITY_DN34381_c4_g1	FTC	FT	112.437	0	74.9577	22.5797	4.20673	5.36752	7.98×10^-08	4.59×10^-06
TRINITY_DN3641_c1_g1	FTC	FT	723.681	172.699	540.02	2.0671	0.385133	5.36725	7.99×10^-08	4.59×10^-06
TRINITY_DN9972_c0_g1	FTC	FT	111.956	0	74.6371	22.5742	4.20673	5.36621	8.04×10^-08	4.61×10^-06
TRINITY_DN79356_c0_g2	FTC	FT	111.812	0	74.5414	22.5729	4.20673	5.3659	8.05×10^-08	4.62×10^-06
TRINITY_DN7997_c0_g1	FTC	FT	111.048	0	74.0318	22.5627	4.20674	5.36348	8.16×10^-08	4.68×10^-06
TRINITY_DN6174_c1_g1	FTC	FT	5.96298	166.832	59.5861	-4.8848	0.910882	-5.36271	8.20×10^-08	4.69×10^-06
TRINITY_DN3161_c0_g1	FTC	FT	4.47371	82.5499	30.4991	-4.12578	0.769388	-5.36241	8.21×10^-08	4.70×10^-06
TRINITY_DN1194_c17_g1	FTC	FT	244.717	0	163.145	22.5536	4.20635	5.36181	8.24×10^-08	4.71×10^-06
TRINITY_DN3550_c0_g1	FTC	FT	6381.67	0.689436	4254.68	13.1965	2.46134	5.36153	8.25×10^-08	4.71×10^-06
TRINITY_DN6170_c4_g1	FTC	FT	112.099	0	74.7325	22.5532	4.20673	5.36122	8.27×10^-08	4.72×10^-06
TRINITY_DN85444_c0_g1	FTC	FT	53.6391	0	35.7594	8.81386	1.64455	5.35945	8.35×10^-08	4.76×10^-06
TRINITY_DN9093_c0_g3	FTC	FT	39.8469	0	26.5646	8.39449	1.56659	5.35845	8.39×10^-08	4.78×10^-06
TRINITY_DN29659_c1_g2	FTC	FT	109.188	0	72.7919	22.5409	4.20675	5.35828	8.40×10^-08	4.78×10^-06
TRINITY_DN885_c0_g4	FTC	FT	135.908	394.227	222.014	-1.53797	0.287046	-5.35794	8.42×10^-08	4.79×10^-06
TRINITY_DN4568_c4_g1	FTC	FT	120.689	0	80.459	22.5379	4.20668	5.35764	8.43×10^-08	4.79×10^-06
TRINITY_DN30784_c4_g1	FTC	FT	88.8744	0	59.2496	9.53861	1.78063	5.35686	8.47×10^-08	4.81×10^-06
TRINITY_DN2255_c8_g1	FTC	FT	51.4282	0	34.2854	8.75988	1.6355	5.35608	8.50×10^-08	4.83×10^-06
TRINITY_DN6425_c0_g2	FTC	FT	213.71	0	142.474	22.5288	4.2064	5.35584	8.52×10^-08	4.83×10^-06
TRINITY_DN72472_c0_g1	FTC	FT	230.644	0	153.763	22.5267	4.20637	5.35538	8.54×10^-08	4.83×10^-06
TRINITY_DN29561_c0_g1	FTC	FT	108.883	0	72.5884	22.5285	4.20675	5.35533	8.54×10^-08	4.83×10^-06
TRINITY_DN18117_c1_g1	FTC	FT	108.137	0	72.0914	22.5268	4.20675	5.35492	8.56×10^-08	4.84×10^-06
TRINITY_DN72538_c0_g1	FTC	FT	107.394	0	71.596	22.5181	4.20676	5.35283	8.66×10^-08	4.89×10^-06
TRINITY_DN73725_c1_g4	FTC	FT	39.0006	3.32713	27.1094	3.58165	0.669441	5.35021	8.79×10^-08	4.96×10^-06
TRINITY_DN47210_c0_g4	FTC	FT	14.7893	101.232	43.6036	-2.75687	0.515356	-5.34946	8.82×10^-08	4.98×10^-06
TRINITY_DN8564_c0_g1	FTC	FT	2.32878	315.279	106.645	-6.95354	1.30032	-5.34757	8.91×10^-08	5.03×10^-06
TRINITY_DN50359_c1_g1	FTC	FT	0	252.617	84.2056	-10.1365	1.89601	-5.34622	8.98×10^-08	5.06×10^-06
TRINITY_DN24926_c4_g1	FTC	FT	0	239.17	79.7233	-10.0576	1.8815	-5.3455	9.02×10^-08	5.08×10^-06
TRINITY_DN60810_c3_g1	FTC	FT	105.344	0	70.229	22.4866	4.20677	5.34533	9.03×10^-08	5.08×10^-06
TRINITY_DN30371_c3_g1	FTC	FT	206.792	0	137.861	22.4775	4.20641	5.34364	9.11×10^-08	5.12×10^-06
TRINITY_DN8823_c0_g3	FTC	FT	133.712	0	89.1416	22.4757	4.20662	5.34293	9.15×10^-08	5.13×10^-06
TRINITY_DN26239_c1_g1	FTC	FT	152.91	0	101.94	22.4729	4.20654	5.34237	9.17×10^-08	5.13×10^-06
TRINITY_DN41833_c1_g1	FTC	FT	152.91	0	101.94	22.4729	4.20654	5.34237	9.17×10^-08	5.13×10^-06
TRINITY_DN50832_c0_g2	FTC	FT	152.91	0	101.94	22.4729	4.20654	5.34237	9.17×10^-08	5.13×10^-06
TRINITY_DN104264_c2_g1	FTC	FT	0	206.395	68.7983	-9.84489	1.84283	-5.34227	9.18×10^-08	5.13×10^-06
TRINITY_DN12541_c1_g1	FTC	FT	106.799	0	71.1994	22.4726	4.20676	5.34203	9.19×10^-08	5.13×10^-06
TRINITY_DN3472_c1_g1	FTC	FT	362.751	22.9697	249.491	3.98102	0.745235	5.34196	9.19×10^-08	5.13×10^-06
TRINITY_DN12276_c2_g3	FTC	FT	104.23	0	69.4867	22.4724	4.20678	5.34194	9.20×10^-08	5.13×10^-06
TRINITY_DN24260_c4_g1	FTC	FT	226.181	0	150.787	22.4601	4.20638	5.33953	9.32×10^-08	5.19×10^-06
TRINITY_DN24520_c9_g1	FTC	FT	226.181	0	150.787	22.4601	4.20638	5.33953	9.32×10^-08	5.19×10^-06
TRINITY_DN59198_c0_g1	FTC	FT	226.181	0	150.787	22.4601	4.20638	5.33953	9.32×10^-08	5.19×10^-06
TRINITY_DN7661_c0_g4	FTC	FT	41.2161	1.60354	28.0119	4.66403	0.873804	5.33761	9.42×10^-08	5.24×10^-06
TRINITY_DN13298_c2_g1	FTC	FT	102.526	0	68.3507	22.4529	4.20679	5.3373	9.43×10^-08	5.25×10^-06
TRINITY_DN54133_c0_g2	FTC	FT	3.51367	112.931	39.986	-4.94968	0.927433	-5.33697	9.45×10^-08	5.25×10^-06
TRINITY_DN2721_c2_g1	FTC	FT	40.0867	0	26.7245	8.39646	1.57351	5.33612	9.50×10^-08	5.27×10^-06
TRINITY_DN24772_c0_g4	FTC	FT	102.04	0	68.0264	22.4472	4.2068	5.33593	9.51×10^-08	5.28×10^-06
TRINITY_DN32533_c0_g1	FTC	FT	103.335	0	68.8897	22.4324	4.20679	5.33243	9.69×10^-08	5.37×10^-06
TRINITY_DN107449_c3_g1	FTC	FT	0	241.442	80.4808	-10.0711	1.88914	-5.33107	9.76×10^-08	5.41×10^-06
TRINITY_DN12208_c6_g2	FTC	FT	0	241.442	80.4808	-10.0711	1.88914	-5.33107	9.76×10^-08	5.41×10^-06
TRINITY_DN33003_c0_g2	FTC	FT	234.79	23.3545	164.311	3.33314	0.625295	5.33051	9.79×10^-08	5.42×10^-06
TRINITY_DN311_c0_g1	FTC	FT	234.159	53.9509	174.09	2.1127	0.396383	5.32994	9.82×10^-08	5.43×10^-06
TRINITY_DN18354_c3_g1	FTC	FT	146.066	0	97.3773	22.4194	4.20657	5.32962	9.84×10^-08	5.44×10^-06
TRINITY_DN1897_c0_g2	FTC	FT	0.391869	161.97	54.2514	-8.77373	1.64624	-5.32954	9.85×10^-08	5.44×10^-06
TRINITY_DN27094_c0_g2	FTC	FT	0	300.069	100.023	-10.3847	1.94885	-5.32866	9.89×10^-08	5.46×10^-06
TRINITY_DN116119_c0_g1	FTC	FT	42.8589	0.994136	28.904	5.45775	1.02492	5.32506	1.01×10^-07	5.56×10^-06
TRINITY_DN40927_c0_g1	FTC	FT	301.56	0	201.04	22.3931	4.20629	5.32373	1.02×10^-07	5.60×10^-06
TRINITY_DN21047_c0_g2	FTC	FT	128.881	0	85.9203	22.3943	4.20664	5.32357	1.02×10^-07	5.60×10^-06
TRINITY_DN3000_c0_g1	FTC	FT	2.86793	152.844	52.86	-5.66216	1.06374	-5.32287	1.02×10^-07	5.62×10^-06
TRINITY_DN3201_c1_g2	FTC	FT	98.0704	0	65.3803	22.3923	4.20683	5.32284	1.02×10^-07	5.62×10^-06
TRINITY_DN5996_c1_g1	FTC	FT	1.40284	110.586	37.7971	-6.10085	1.14625	-5.32246	1.02×10^-07	5.62×10^-06
TRINITY_DN58430_c0_g1	FTC	FT	98.2673	382.181	192.905	-1.96942	0.370035	-5.32224	1.02×10^-07	5.63×10^-06
TRINITY_DN48509_c0_g2	FTC	FT	0.229167	91.3925	30.6169	-7.94833	1.49347	-5.32204	1.03×10^-07	5.63×10^-06
TRINITY_DN4882_c1_g1	FTC	FT	42.2434	407.174	163.887	-3.27455	0.615435	-5.32072	1.03×10^-07	5.66×10^-06
TRINITY_DN219_c3_g1	FTC	FT	13.5009	118.092	48.3647	-3.10761	0.584178	-5.31962	1.04×10^-07	5.69×10^-06
TRINITY_DN2029_c2_g1	FTC	FT	408.068	9.66124	275.265	5.39858	1.01519	5.31783	1.05×10^-07	5.74×10^-06
TRINITY_DN6774_c1_g2	FTC	FT	183.926	0	122.617	22.3673	4.20646	5.31737	1.05×10^-07	5.75×10^-06
TRINITY_DN19472_c1_g1	FTC	FT	84.2595	14.8566	61.1252	2.49803	0.469865	5.3165	1.06×10^-07	5.78×10^-06
TRINITY_DN1777_c7_g1	FTC	FT	295.909	0	197.273	22.3483	4.2063	5.31306	1.08×10^-07	5.88×10^-06
TRINITY_DN8885_c0_g1	FTC	FT	184.297	0	122.865	22.3459	4.20646	5.31229	1.08×10^-07	5.90×10^-06
TRINITY_DN9654_c3_g1	FTC	FT	189.806	0	126.538	22.3435	4.20644	5.31174	1.09×10^-07	5.92×10^-06
TRINITY_DN66962_c0_g2	FTC	FT	34.4754	0	22.9836	8.16667	1.53765	5.31113	1.09×10^-07	5.93×10^-06
TRINITY_DN12343_c4_g1	FTC	FT	0	202.498	67.4995	-9.81739	1.84889	-5.30988	1.10×10^-07	5.97×10^-06
TRINITY_DN130569_c7_g1	FTC	FT	93.9049	0	62.6033	22.3304	4.20686	5.3081	1.11×10^-07	6.02×10^-06
TRINITY_DN91145_c1_g1	FTC	FT	93.9173	0	62.6115	22.3304	4.20686	5.30809	1.11×10^-07	6.02×10^-06
TRINITY_DN2589_c1_g1	FTC	FT	2172.03	587.907	1643.99	1.88495	0.355354	5.30442	1.13×10^-07	6.14×10^-06
TRINITY_DN35762_c0_g2	FTC	FT	0	204.899	68.2996	-9.83442	1.85422	-5.3038	1.13×10^-07	6.15×10^-06
TRINITY_DN17686_c1_g1	FTC	FT	174.144	0	116.096	22.3079	4.20648	5.30323	1.14×10^-07	6.16×10^-06
TRINITY_DN3860_c3_g1	FTC	FT	174.144	0	116.096	22.3079	4.20648	5.30323	1.14×10^-07	6.16×10^-06
TRINITY_DN43801_c0_g4	FTC	FT	0	201.504	67.1681	-9.81029	1.85021	-5.30227	1.14×10^-07	6.18×10^-06
TRINITY_DN52559_c2_g1	FTC	FT	0	201.504	67.1681	-9.81029	1.85021	-5.30227	1.14×10^-07	6.18×10^-06
TRINITY_DN11636_c2_g1	FTC	FT	2.49462	110.875	38.6214	-5.35482	1.00993	-5.30216	1.14×10^-07	6.18×10^-06
TRINITY_DN38996_c0_g1	FTC	FT	91.9544	0	61.3029	22.3012	4.20688	5.30112	1.15×10^-07	6.22×10^-06
TRINITY_DN141_c0_g2	FTC	FT	172.911	0	115.274	22.2931	4.20648	5.29969	1.16×10^-07	6.25×10^-06
TRINITY_DN39558_c0_g1	FTC	FT	172.911	0	115.274	22.2931	4.20648	5.29969	1.16×10^-07	6.25×10^-06
TRINITY_DN3193_c5_g1	FTC	FT	191.138	0	127.425	22.2927	4.20644	5.29966	1.16×10^-07	6.25×10^-06
TRINITY_DN61_c0_g1	FTC	FT	941.23	1940.85	1274.44	-1.04335	0.196934	-5.29796	1.17×10^-07	6.31×10^-06
TRINITY_DN811_c0_g1	FTC	FT	326.656	11.0001	221.437	4.89366	0.924017	5.29608	1.18×10^-07	6.37×10^-06
TRINITY_DN6313_c0_g1	FTC	FT	77.743	395.172	183.553	-2.35187	0.444406	-5.29217	1.21×10^-07	6.50×10^-06
TRINITY_DN110202_c0_g1	FTC	FT	0	207.315	69.1051	-9.85129	1.86153	-5.29205	1.21×10^-07	6.50×10^-06
TRINITY_DN9959_c0_g1	FTC	FT	68.0667	0	45.3778	9.16059	1.73109	5.2918	1.21×10^-07	6.50×10^-06
TRINITY_DN18192_c0_g1	FTC	FT	204.281	0	136.187	22.2518	4.20641	5.28998	1.22×10^-07	6.56×10^-06
TRINITY_DN5979_c4_g1	FTC	FT	204.281	0	136.187	22.2518	4.20641	5.28998	1.22×10^-07	6.56×10^-06
TRINITY_DN116115_c0_g1	FTC	FT	127.783	0	85.1886	22.2445	4.20664	5.28793	1.24×10^-07	6.62×10^-06
TRINITY_DN124161_c2_g1	FTC	FT	88.554	0	59.036	22.2458	4.20691	5.28792	1.24×10^-07	6.62×10^-06
TRINITY_DN2244_c5_g1	FTC	FT	0	299.7	99.8999	-10.383	1.96382	-5.28711	1.24×10^-07	6.65×10^-06
TRINITY_DN4640_c0_g1	FTC	FT	117.453	0	78.3021	22.2395	4.2067	5.28669	1.25×10^-07	6.66×10^-06
TRINITY_DN1717_c0_g1	FTC	FT	126.17	456.314	236.218	-1.85523	0.351376	-5.27988	1.29×10^-07	6.90×10^-06
TRINITY_DN5590_c0_g3	FTC	FT	86.6684	287.255	153.531	-1.72484	0.326776	-5.27836	1.30×10^-07	6.96×10^-06
TRINITY_DN176_c0_g1	FTC	FT	6244.72	2300.48	4929.97	1.44059	0.27295	5.27784	1.31×10^-07	6.97×10^-06
TRINITY_DN46287_c0_g1	FTC	FT	262.685	0	175.123	22.1985	4.20633	5.2774	1.31×10^-07	6.98×10^-06
TRINITY_DN19548_c3_g1	FTC	FT	0	286.151	95.3837	-10.3162	1.95777	-5.26936	1.37×10^-07	7.28×10^-06
TRINITY_DN8585_c0_g4	FTC	FT	0	286.151	95.3837	-10.3162	1.95777	-5.26936	1.37×10^-07	7.28×10^-06
TRINITY_DN3129_c0_g1	FTC	FT	1011.22	22.4158	681.621	5.49759	1.04333	5.26927	1.37×10^-07	7.28×10^-06
TRINITY_DN6901_c0_g1	FTC	FT	11.3471	93.0789	38.591	-3.0448	0.577874	-5.26897	1.37×10^-07	7.29×10^-06
TRINITY_DN2327_c2_g1	FTC	FT	94.9676	533.994	241.31	-2.49842	0.474277	-5.26785	1.38×10^-07	7.33×10^-06
TRINITY_DN30479_c0_g1	FTC	FT	31.6796	0	21.1197	8.0493	1.52811	5.26748	1.38×10^-07	7.34×10^-06
TRINITY_DN7958_c1_g1	FTC	FT	293.194	69.9954	218.794	2.0656	0.392251	5.26601	1.39×10^-07	7.39×10^-06
TRINITY_DN4679_c0_g1	FTC	FT	181.715	0	121.144	22.1323	4.20646	5.2615	1.43×10^-07	7.57×10^-06
TRINITY_DN2542_c1_g1	FTC	FT	0	196.654	65.5512	-9.77514	1.85836	-5.26008	1.44×10^-07	7.62×10^-06
TRINITY_DN26839_c1_g1	FTC	FT	50.6164	0	33.7443	8.72676	1.65943	5.25888	1.45×10^-07	7.67×10^-06
TRINITY_DN4054_c1_g1	FTC	FT	44.6618	5.50005	31.6079	3.03436	0.577052	5.25839	1.45×10^-07	7.68×10^-06
TRINITY_DN41888_c3_g1	FTC	FT	165.964	0	110.643	22.1093	4.2065	5.25599	1.47×10^-07	7.78×10^-06
TRINITY_DN34216_c0_g1	FTC	FT	175.692	0	117.128	22.1054	4.20648	5.25508	1.48×10^-07	7.81×10^-06
TRINITY_DN5600_c1_g1	FTC	FT	60.1509	0.609401	40.3038	6.56614	1.24949	5.25505	1.48×10^-07	7.81×10^-06
TRINITY_DN2724_c4_g1	FTC	FT	51.7343	327.246	143.571	-2.66941	0.507982	-5.25493	1.48×10^-07	7.81×10^-06
TRINITY_DN52474_c4_g1	FTC	FT	0	196.004	65.3348	-9.77036	1.85945	-5.25445	1.48×10^-07	7.82×10^-06
TRINITY_DN4755_c1_g1	FTC	FT	63.6137	1.94825	43.0585	5.04038	0.959529	5.25297	1.50×10^-07	7.88×10^-06
TRINITY_DN35643_c0_g2	FTC	FT	64.0227	0	42.6818	9.07449	1.7278	5.25203	1.50×10^-07	7.91×10^-06
TRINITY_DN3070_c0_g1	FTC	FT	351.644	87.5205	263.603	2.00386	0.381553	5.25186	1.51×10^-07	7.92×10^-06
TRINITY_DN6738_c0_g1	FTC	FT	191.429	0	127.619	10.6474	2.02749	5.25153	1.51×10^-07	7.92×10^-06
TRINITY_DN4831_c0_g1	FTC	FT	5.23642	117.929	42.8008	-4.55187	0.866786	-5.25144	1.51×10^-07	7.92×10^-06
TRINITY_DN4046_c2_g4	FTC	FT	0	212.317	70.7723	-9.88567	1.88306	-5.24979	1.52×10^-07	7.99×10^-06
TRINITY_DN5472_c0_g1	FTC	FT	275.626	1058.91	536.721	-1.94222	0.370011	-5.2491	1.53×10^-07	8.01×10^-06
TRINITY_DN19989_c2_g1	FTC	FT	0.229167	120.573	40.3437	-8.34824	1.59095	-5.24733	1.54×10^-07	8.08×10^-06
TRINITY_DN2136_c0_g1	FTC	FT	1429.18	597.692	1152.02	1.25696	0.23959	5.2463	1.55×10^-07	8.12×10^-06
TRINITY_DN16016_c0_g1	FTC	FT	9.97736	386.388	135.448	-5.31144	1.01261	-5.24531	1.56×10^-07	8.16×10^-06
TRINITY_DN49304_c0_g3	FTC	FT	161.019	0	107.346	22.0641	4.20652	5.24523	1.56×10^-07	8.16×10^-06
TRINITY_DN863_c16_g1	FTC	FT	96.6879	0	64.4586	9.66009	1.84203	5.24428	1.57×10^-07	8.20×10^-06
TRINITY_DN4059_c2_g1	FTC	FT	0.467612	84.0025	28.3126	-7.15655	1.36476	-5.24383	1.57×10^-07	8.21×10^-06
TRINITY_DN1053_c3_g1	FTC	FT	0.621036	72.19	24.4774	-6.90379	1.31701	-5.24203	1.59×10^-07	8.28×10^-06
TRINITY_DN9535_c0_g1	FTC	FT	6189.5	389.041	4256.01	3.99168	0.761561	5.24144	1.59×10^-07	8.31×10^-06
TRINITY_DN2882_c0_g1	FTC	FT	476.995	43.391	332.46	3.45702	0.659703	5.24027	1.60×10^-07	8.35×10^-06
TRINITY_DN6708_c1_g1	FTC	FT	35.9166	0	23.9444	8.24524	1.57377	5.23917	1.61×10^-07	8.40×10^-06
TRINITY_DN12409_c0_g1	FTC	FT	740.873	254.107	578.617	1.54569	0.295058	5.2386	1.62×10^-07	8.42×10^-06
TRINITY_DN2900_c4_g1	FTC	FT	215.526	0	143.684	22.0282	4.20639	5.23684	1.63×10^-07	8.49×10^-06
TRINITY_DN71237_c2_g1	FTC	FT	0	247.069	82.3563	-10.1044	1.92959	-5.23652	1.64×10^-07	8.50×10^-06
TRINITY_DN21209_c0_g3	FTC	FT	147.298	0	98.1989	22.0176	4.20656	5.23412	1.66×10^-07	8.61×10^-06
TRINITY_DN8578_c0_g1	FTC	FT	0.229167	86.942	29.1334	-7.87625	1.5052	-5.23269	1.67×10^-07	8.67×10^-06
TRINITY_DN117799_c0_g1	FTC	FT	135.629	0	90.4193	22.0087	4.20661	5.23193	1.68×10^-07	8.70×10^-06
TRINITY_DN16408_c1_g2	FTC	FT	41.156	0	27.4373	8.43674	1.61291	5.23076	1.69×10^-07	8.74×10^-06
TRINITY_DN110777_c1_g1	FTC	FT	0	193.871	64.6238	-9.75458	1.86515	-5.22992	1.70×10^-07	8.78×10^-06
TRINITY_DN53594_c0_g1	FTC	FT	16.4857	179.335	70.7688	-3.40724	0.651589	-5.22912	1.70×10^-07	8.81×10^-06
TRINITY_DN4924_c0_g1	FTC	FT	4.72964	55.5944	21.6846	-3.55957	0.681161	-5.22573	1.73×10^-07	8.97×10^-06
TRINITY_DN73139_c0_g1	FTC	FT	37.9141	0	25.2761	8.30347	1.58927	5.22471	1.74×10^-07	9.01×10^-06
TRINITY_DN18573_c0_g2	FTC	FT	12.5076	200.11	75.0417	-3.96548	0.759164	-5.22348	1.76×10^-07	9.06×10^-06
TRINITY_DN24164_c2_g1	FTC	FT	0	192.108	64.0359	-9.74139	1.86606	-5.22029	1.79×10^-07	9.21×10^-06
TRINITY_DN9880_c3_g1	FTC	FT	0	1273.05	424.349	-12.4696	2.38869	-5.22027	1.79×10^-07	9.21×10^-06
TRINITY_DN11896_c1_g1	FTC	FT	2.85099	57.2534	20.9851	-4.29882	0.823533	-5.21997	1.79×10^-07	9.22×10^-06
TRINITY_DN904_c1_g1	FTC	FT	176.821	22.1294	125.257	2.9906	0.572944	5.21971	1.79×10^-07	9.22×10^-06
TRINITY_DN19444_c0_g3	FTC	FT	38.1451	0	25.4301	8.32905	1.59575	5.21953	1.79×10^-07	9.23×10^-06
TRINITY_DN19515_c1_g2	FTC	FT	660.263	49.6942	456.74	3.73182	0.715354	5.21675	1.82×10^-07	9.36×10^-06
TRINITY_DN64105_c2_g1	FTC	FT	0	223.708	74.5694	-9.96106	1.90959	-5.21634	1.82×10^-07	9.37×10^-06
TRINITY_DN8169_c2_g3	FTC	FT	0	223.708	74.5694	-9.96106	1.90959	-5.21634	1.82×10^-07	9.37×10^-06
TRINITY_DN5517_c0_g1	FTC	FT	250.601	1.29884	167.5	7.59249	1.45577	5.21544	1.83×10^-07	9.41×10^-06
TRINITY_DN2742_c1_g1	FTC	FT	10.274	99.9824	40.1768	-3.29751	0.632333	-5.21484	1.84×10^-07	9.43×10^-06
TRINITY_DN1316_c2_g1	FTC	FT	516.818	207.254	413.63	1.31855	0.25296	5.21247	1.86×10^-07	9.54×10^-06
TRINITY_DN4074_c4_g1	FTC	FT	0	191.114	63.7045	-9.73391	1.86752	-5.21221	1.87×10^-07	9.54×10^-06
TRINITY_DN74497_c0_g1	FTC	FT	0	191.114	63.7045	-9.73391	1.86752	-5.21221	1.87×10^-07	9.54×10^-06
TRINITY_DN4467_c2_g1	FTC	FT	0	491.237	163.746	-11.0958	2.12905	-5.21165	1.87×10^-07	9.57×10^-06
TRINITY_DN73462_c0_g1	FTC	FT	5.94194	141.533	51.139	-4.53295	0.869863	-5.2111	1.88×10^-07	9.59×10^-06
TRINITY_DN8717_c0_g1	FTC	FT	34.5771	0	23.0514	8.19064	1.57179	5.21102	1.88×10^-07	9.59×10^-06
TRINITY_DN14233_c0_g1	FTC	FT	237.141	0	158.094	10.9588	2.10322	5.21048	1.88×10^-07	9.61×10^-06
TRINITY_DN25078_c0_g1	FTC	FT	74.6571	0	49.7714	9.28552	1.78224	5.21003	1.89×10^-07	9.62×10^-06
TRINITY_DN2944_c4_g1	FTC	FT	41.7229	407.779	163.742	-3.28991	0.631617	-5.20872	1.90×10^-07	9.69×10^-06
TRINITY_DN22186_c0_g1	FTC	FT	153.885	0	102.59	10.3348	1.9843	5.20826	1.91×10^-07	9.70×10^-06
TRINITY_DN27575_c0_g2	FTC	FT	211.078	0	140.719	21.9003	4.2064	5.20642	1.93×10^-07	9.79×10^-06
TRINITY_DN10721_c1_g1	FTC	FT	0	236.606	78.8687	-10.042	1.92885	-5.20622	1.93×10^-07	9.80×10^-06
TRINITY_DN3142_c9_g1	FTC	FT	199.873	0	133.249	21.898	4.20642	5.20586	1.93×10^-07	9.81×10^-06
TRINITY_DN69989_c4_g1	FTC	FT	225.28	0	150.187	21.8957	4.20638	5.20536	1.94×10^-07	9.83×10^-06
TRINITY_DN9867_c6_g1	FTC	FT	126.722	0	84.481	21.8902	4.20665	5.20372	1.95×10^-07	9.91×10^-06
TRINITY_DN14457_c0_g1	FTC	FT	601.657	72.4301	425.248	3.0542	0.587216	5.20116	1.98×10^-07	1.00×10^-05
TRINITY_DN9164_c0_g1	FTC	FT	6.96165	197.168	70.3636	-4.85297	0.933346	-5.19954	2.00×10^-07	1.01×10^-05
TRINITY_DN230_c3_g1	FTC	FT	0	216.244	72.0814	-9.91211	1.90686	-5.19814	2.01×10^-07	1.02×10^-05
TRINITY_DN20672_c1_g1	FTC	FT	57.47	2.59767	39.1792	4.4707	0.86008	5.198	2.01×10^-07	1.02×10^-05
TRINITY_DN5659_c0_g1	FTC	FT	213.708	25.1918	150.87	3.0857	0.593887	5.19578	2.04×10^-07	1.03×10^-05
TRINITY_DN10491_c0_g1	FTC	FT	70.4268	0	46.9512	9.20464	1.77177	5.19517	2.05×10^-07	1.03×10^-05
TRINITY_DN22938_c5_g1	FTC	FT	58.3634	0	38.9089	8.93927	1.72079	5.19485	2.05×10^-07	1.03×10^-05
TRINITY_DN2921_c4_g1	FTC	FT	5.97786	53.1568	21.7042	-3.16476	0.609265	-5.19438	2.05×10^-07	1.04×10^-05
TRINITY_DN1272_c4_g1	FTC	FT	13.0121	79.9676	35.3306	-2.63743	0.507749	-5.19435	2.05×10^-07	1.04×10^-05
TRINITY_DN14620_c0_g1	FTC	FT	97.1089	0	64.7392	21.8428	4.20684	5.19222	2.08×10^-07	1.05×10^-05
TRINITY_DN12958_c0_g1	FTC	FT	82.8916	6.63881	57.474	3.63797	0.700745	5.19158	2.09×10^-07	1.05×10^-05
TRINITY_DN1382_c2_g1	FTC	FT	272.79	1.68357	182.421	7.35513	1.41743	5.18907	2.11×10^-07	1.06×10^-05
TRINITY_DN3215_c0_g2	FTC	FT	192.079	0	128.053	21.827	4.20644	5.18896	2.11×10^-07	1.06×10^-05
TRINITY_DN10143_c0_g2	FTC	FT	92.4774	454.642	213.199	-2.29205	0.441955	-5.18617	2.15×10^-07	1.08×10^-05
TRINITY_DN38249_c2_g1	FTC	FT	167.645	0	111.764	21.7987	4.2065	5.18216	2.19×10^-07	1.10×10^-05
TRINITY_DN8447_c5_g1	FTC	FT	167.645	0	111.764	21.7987	4.2065	5.18216	2.19×10^-07	1.10×10^-05
TRINITY_DN17467_c0_g1	FTC	FT	443.038	32.8156	306.297	3.75431	0.724629	5.181	2.21×10^-07	1.11×10^-05
TRINITY_DN15927_c0_g2	FTC	FT	41.4847	0	27.6565	8.43956	1.62906	5.18063	2.21×10^-07	1.11×10^-05
TRINITY_DN2188_c3_g1	FTC	FT	147.586	0	98.3909	21.7909	4.20656	5.18022	2.22×10^-07	1.11×10^-05
TRINITY_DN11182_c0_g1	FTC	FT	78.7421	0	52.4947	9.36663	1.80886	5.1782	2.24×10^-07	1.12×10^-05
TRINITY_DN26074_c2_g2	FTC	FT	90.253	0	60.1687	9.56629	1.84742	5.17819	2.24×10^-07	1.12×10^-05
TRINITY_DN239_c1_g1	FTC	FT	47.9987	0	31.9992	8.66134	1.67332	5.17614	2.27×10^-07	1.13×10^-05
TRINITY_DN6682_c1_g2	FTC	FT	30.8799	714.121	258.627	-4.54748	0.878603	-5.1758	2.27×10^-07	1.13×10^-05
TRINITY_DN2229_c2_g2	FTC	FT	194.58	0	129.72	21.7683	4.20643	5.175	2.28×10^-07	1.14×10^-05
TRINITY_DN2699_c1_g1	FTC	FT	0	265.274	88.4248	-10.2069	1.97276	-5.17394	2.29×10^-07	1.14×10^-05
TRINITY_DN54236_c0_g1	FTC	FT	88.294	0	58.8627	9.53057	1.84229	5.17323	2.30×10^-07	1.15×10^-05
TRINITY_DN5463_c2_g1	FTC	FT	232.9	80.5033	182.101	1.53063	0.295887	5.17302	2.30×10^-07	1.15×10^-05
TRINITY_DN14958_c1_g1	FTC	FT	61.7922	1.90824	41.8309	5.00513	0.967621	5.17262	2.31×10^-07	1.15×10^-05
TRINITY_DN8134_c0_g3	FTC	FT	168.585	0	112.39	21.7533	4.2065	5.17137	2.32×10^-07	1.16×10^-05
TRINITY_DN13259_c8_g1	FTC	FT	167.931	0	111.954	21.7503	4.2065	5.17064	2.33×10^-07	1.16×10^-05
TRINITY_DN13035_c0_g1	FTC	FT	163.429	0	108.953	21.7455	4.20651	5.16948	2.35×10^-07	1.17×10^-05
TRINITY_DN3610_c0_g1	FTC	FT	80.0108	500.298	220.107	-2.65473	0.513727	-5.16759	2.37×10^-07	1.18×10^-05
TRINITY_DN4715_c2_g2	FTC	FT	20.0368	173.493	71.1889	-3.11978	0.603726	-5.16754	2.37×10^-07	1.18×10^-05
TRINITY_DN2679_c0_g1	FTC	FT	78.4461	534.437	230.443	-2.76425	0.535362	-5.16332	2.43×10^-07	1.20×10^-05
TRINITY_DN5088_c0_g1	FTC	FT	15.4674	88.4901	39.8083	-2.48881	0.48207	-5.16276	2.43×10^-07	1.21×10^-05
TRINITY_DN315_c1_g1	FTC	FT	1134.25	257.739	842.077	2.13726	0.414051	5.16183	2.45×10^-07	1.21×10^-05
TRINITY_DN22_c2_g1	FTC	FT	74.9834	4.01656	51.3278	4.241	0.822088	5.15882	2.49×10^-07	1.23×10^-05
TRINITY_DN55165_c0_g2	FTC	FT	0	430.907	143.636	-10.9069	2.11424	-5.15876	2.49×10^-07	1.23×10^-05
TRINITY_DN10024_c0_g1	FTC	FT	1084.49	176.657	781.879	2.61746	0.507629	5.15626	2.52×10^-07	1.24×10^-05
TRINITY_DN8971_c1_g1	FTC	FT	1934.32	265.781	1378.14	2.86348	0.555401	5.1557	2.53×10^-07	1.25×10^-05
TRINITY_DN74981_c0_g2	FTC	FT	30.2006	0	20.1337	7.98305	1.54906	5.15347	2.56×10^-07	1.26×10^-05
TRINITY_DN4306_c1_g1	FTC	FT	117.68	0	78.4532	9.94941	1.93079	5.15303	2.56×10^-07	1.26×10^-05
TRINITY_DN89029_c0_g3	FTC	FT	30.8826	0	20.5884	8.02415	1.5573	5.15262	2.57×10^-07	1.27×10^-05
TRINITY_DN23409_c0_g4	FTC	FT	0	183.97	61.3233	-9.67895	1.88036	-5.14739	2.64×10^-07	1.30×10^-05
TRINITY_DN7333_c1_g1	FTC	FT	2.75054	158.061	54.5206	-5.86873	1.1402	-5.14709	2.65×10^-07	1.30×10^-05
TRINITY_DN3435_c0_g2	FTC	FT	3313.61	322.474	2316.57	3.36093	0.653041	5.14657	2.65×10^-07	1.30×10^-05
TRINITY_DN29352_c4_g1	FTC	FT	165.914	0	110.609	21.6486	4.2065	5.14645	2.65×10^-07	1.30×10^-05
TRINITY_DN44365_c1_g1	FTC	FT	336.594	17.3096	230.166	4.28072	0.831814	5.14624	2.66×10^-07	1.31×10^-05
TRINITY_DN4649_c5_g1	FTC	FT	169.428	0	112.952	21.6409	4.20649	5.14464	2.68×10^-07	1.31×10^-05
TRINITY_DN8104_c2_g1	FTC	FT	169.428	0	112.952	21.6409	4.20649	5.14464	2.68×10^-07	1.31×10^-05
TRINITY_DN1657_c1_g1	FTC	FT	257.162	72.824	195.716	1.82371	0.354514	5.14424	2.69×10^-07	1.32×10^-05
TRINITY_DN92480_c0_g1	FTC	FT	166.799	0	111.2	21.6379	4.2065	5.14393	2.69×10^-07	1.32×10^-05
TRINITY_DN2423_c8_g1	FTC	FT	0	183.321	61.1069	-9.67385	1.88157	-5.14138	2.73×10^-07	1.33×10^-05
TRINITY_DN263_c0_g1	FTC	FT	924.971	456.975	768.972	1.01672	0.197754	5.14136	2.73×10^-07	1.33×10^-05
TRINITY_DN13433_c7_g1	FTC	FT	160.411	0	106.94	21.6227	4.20652	5.14029	2.74×10^-07	1.34×10^-05
TRINITY_DN79932_c0_g1	FTC	FT	296.243	0	197.495	11.2781	2.19419	5.13999	2.75×10^-07	1.34×10^-05
TRINITY_DN3047_c8_g1	FTC	FT	163.064	0	108.709	21.6208	4.20651	5.13984	2.75×10^-07	1.34×10^-05
TRINITY_DN17716_c2_g1	FTC	FT	166.046	0	110.697	21.6207	4.2065	5.13982	2.75×10^-07	1.34×10^-05
TRINITY_DN2951_c2_g1	FTC	FT	167.1	0	111.4	21.6175	4.2065	5.13907	2.76×10^-07	1.35×10^-05
TRINITY_DN25067_c1_g1	FTC	FT	162.216	0	108.144	21.6147	4.20651	5.13839	2.77×10^-07	1.35×10^-05
TRINITY_DN23113_c0_g5	FTC	FT	90.4492	0	60.2995	9.56426	1.86291	5.13403	2.84×10^-07	1.38×10^-05
TRINITY_DN2499_c4_g1	FTC	FT	156.531	0	104.354	21.5874	4.20653	5.13187	2.87×10^-07	1.40×10^-05
TRINITY_DN104254_c0_g1	FTC	FT	165.714	0	110.476	21.5858	4.2065	5.13154	2.87×10^-07	1.40×10^-05
TRINITY_DN2357_c6_g1	FTC	FT	165.714	0	110.476	21.5858	4.2065	5.13154	2.87×10^-07	1.40×10^-05
TRINITY_DN10033_c0_g3	FTC	FT	30.1595	0	20.1063	7.99099	1.55736	5.1311	2.88×10^-07	1.40×10^-05
TRINITY_DN1237_c15_g1	FTC	FT	0	366.889	122.296	-10.6749	2.08056	-5.13077	2.89×10^-07	1.40×10^-05
TRINITY_DN24666_c0_g2	FTC	FT	33.6474	0	22.4316	8.14454	1.58766	5.1299	2.90×10^-07	1.41×10^-05
TRINITY_DN2451_c5_g2	FTC	FT	0	182.871	60.9571	-9.6703	1.88556	-5.12862	2.92×10^-07	1.41×10^-05
TRINITY_DN86489_c0_g1	FTC	FT	907.233	106.495	640.32	3.08938	0.602463	5.12793	2.93×10^-07	1.42×10^-05
TRINITY_DN1703_c5_g1	FTC	FT	1225.41	19.8364	823.553	5.94717	1.15981	5.12769	2.93×10^-07	1.42×10^-05
TRINITY_DN2698_c0_g1	FTC	FT	73.9474	2062.12	736.672	-4.79696	0.936119	-5.1243	2.99×10^-07	1.44×10^-05
TRINITY_DN10173_c4_g1	FTC	FT	157.048	0	104.699	21.5539	4.20653	5.12392	2.99×10^-07	1.45×10^-05
TRINITY_DN1390_c2_g3	FTC	FT	2075.64	513.517	1554.93	2.0154	0.393334	5.12388	2.99×10^-07	1.45×10^-05
TRINITY_DN90978_c2_g1	FTC	FT	154.588	0	103.058	21.5502	4.20654	5.12302	3.01×10^-07	1.45×10^-05
TRINITY_DN1240_c1_g2	FTC	FT	659.528	249.435	522.83	1.40248	0.273772	5.12282	3.01×10^-07	1.45×10^-05
TRINITY_DN4931_c0_g1	FTC	FT	19.6575	168.338	69.2176	-3.06752	0.599071	-5.12047	3.05×10^-07	1.47×10^-05
TRINITY_DN5282_c1_g1	FTC	FT	205.667	33.8498	148.394	2.60126	0.508028	5.12031	3.05×10^-07	1.47×10^-05
TRINITY_DN2400_c0_g1	FTC	FT	221.81	42.486	162.035	2.38598	0.466179	5.11816	3.09×10^-07	1.49×10^-05
TRINITY_DN21220_c0_g1	FTC	FT	448.227	32.9202	309.791	3.7655	0.735852	5.1172	3.10×10^-07	1.49×10^-05
TRINITY_DN16485_c6_g1	FTC	FT	48.3427	0	32.2284	8.66964	1.69456	5.11615	3.12×10^-07	1.50×10^-05
TRINITY_DN11598_c3_g1	FTC	FT	32.9506	0	21.9671	8.11354	1.58599	5.11577	3.12×10^-07	1.50×10^-05
TRINITY_DN50_c9_g1	FTC	FT	69.5382	249.312	129.463	-1.84237	0.36022	-5.11456	3.14×10^-07	1.51×10^-05
TRINITY_DN2653_c1_g1	FTC	FT	327.399	8.17775	220.992	5.32637	1.04149	5.11418	3.15×10^-07	1.51×10^-05
TRINITY_DN481_c0_g1	FTC	FT	985.739	18.433	663.304	5.73929	1.12229	5.11391	3.16×10^-07	1.51×10^-05
TRINITY_DN92732_c2_g1	FTC	FT	156.17	0	104.114	21.5115	4.20653	5.11382	3.16×10^-07	1.51×10^-05
TRINITY_DN2855_c2_g1	FTC	FT	195.457	496.355	295.756	-1.34838	0.263678	-5.11372	3.16×10^-07	1.51×10^-05
TRINITY_DN41545_c2_g1	FTC	FT	0	180.418	60.1394	-9.65082	1.88733	-5.11348	3.16×10^-07	1.51×10^-05
TRINITY_DN57701_c0_g1	FTC	FT	145.647	0	97.0982	21.5066	4.20657	5.11263	3.18×10^-07	1.52×10^-05
TRINITY_DN22662_c0_g1	FTC	FT	13.6238	78.1886	35.1454	-2.53866	0.496708	-5.11097	3.21×10^-07	1.53×10^-05
TRINITY_DN7635_c1_g1	FTC	FT	149.002	0	99.3347	21.499	4.20656	5.11084	3.21×10^-07	1.53×10^-05
TRINITY_DN5934_c1_g1	FTC	FT	260.297	8.90721	176.5	4.87439	0.954145	5.10865	3.24×10^-07	1.55×10^-05
TRINITY_DN17202_c1_g1	FTC	FT	3.13421	59.6664	21.9783	-4.15099	0.812545	-5.10863	3.25×10^-07	1.55×10^-05
TRINITY_DN113877_c0_g1	FTC	FT	0	189.097	63.0324	-9.71864	1.90274	-5.10772	3.26×10^-07	1.55×10^-05
TRINITY_DN29299_c5_g1	FTC	FT	59.4158	0	39.6105	8.9576	1.7539	5.10724	3.27×10^-07	1.56×10^-05
TRINITY_DN638_c0_g1	FTC	FT	5750.42	958.574	4153.14	2.58485	0.50615	5.10688	3.28×10^-07	1.56×10^-05
TRINITY_DN15976_c2_g1	FTC	FT	156.77	0	104.513	21.479	4.20653	5.10611	3.29×10^-07	1.56×10^-05
TRINITY_DN77983_c0_g1	FTC	FT	35.8913	0	23.9275	8.23417	1.61267	5.10594	3.29×10^-07	1.57×10^-05
TRINITY_DN46976_c0_g1	FTC	FT	329.887	117.729	259.168	1.48446	0.29076	5.10546	3.30×10^-07	1.57×10^-05
TRINITY_DN20660_c1_g3	FTC	FT	147.63	0	98.4199	21.4763	4.20656	5.10544	3.30×10^-07	1.57×10^-05
TRINITY_DN8577_c1_g2	FTC	FT	147.63	0	98.4199	21.4763	4.20656	5.10544	3.30×10^-07	1.57×10^-05
TRINITY_DN53090_c2_g1	FTC	FT	154.815	0	103.21	21.476	4.20654	5.10539	3.30×10^-07	1.57×10^-05
TRINITY_DN10184_c1_g2	FTC	FT	45.7764	0	30.5176	8.57725	1.6802	5.1049	3.31×10^-07	1.57×10^-05
TRINITY_DN10111_c0_g2	FTC	FT	34.4814	3.24709	24.0699	3.42401	0.67076	5.10468	3.31×10^-07	1.57×10^-05
TRINITY_DN4340_c0_g1	FTC	FT	2555.16	49.9926	1720.1	5.67484	1.11193	5.10358	3.33×10^-07	1.58×10^-05
TRINITY_DN2281_c2_g1	FTC	FT	109.748	2999.54	1073.01	-4.76967	0.934706	-5.10285	3.35×10^-07	1.58×10^-05
TRINITY_DN13578_c0_g5	FTC	FT	0	215.021	71.6738	-9.90401	1.94122	-5.10194	3.36×10^-07	1.59×10^-05
TRINITY_DN29499_c0_g1	FTC	FT	90.7127	4.89065	62.1054	4.21564	0.826332	5.10164	3.37×10^-07	1.59×10^-05
TRINITY_DN15962_c0_g8	FTC	FT	150.899	0	100.6	21.4601	4.20655	5.10159	3.37×10^-07	1.59×10^-05
TRINITY_DN74553_c0_g1	FTC	FT	150.899	0	100.6	21.4601	4.20655	5.10159	3.37×10^-07	1.59×10^-05
TRINITY_DN15073_c1_g1	FTC	FT	0	179.119	59.7065	-9.6404	1.88983	-5.10119	3.38×10^-07	1.59×10^-05
TRINITY_DN4402_c10_g1	FTC	FT	0	179.119	59.7065	-9.6404	1.88983	-5.10119	3.38×10^-07	1.59×10^-05
TRINITY_DN9754_c0_g2	FTC	FT	0	179.119	59.7065	-9.6404	1.88983	-5.10119	3.38×10^-07	1.59×10^-05
TRINITY_DN232_c5_g1	FTC	FT	153.533	0	102.355	21.4579	4.20654	5.10107	3.38×10^-07	1.59×10^-05
TRINITY_DN37682_c0_g1	FTC	FT	35.8642	0	23.9095	8.23781	1.615	5.10082	3.38×10^-07	1.59×10^-05
TRINITY_DN533_c9_g1	FTC	FT	104.631	0	69.7542	9.77923	1.91731	5.10049	3.39×10^-07	1.59×10^-05
TRINITY_DN54018_c0_g4	FTC	FT	0	305.117	101.706	-10.4088	2.0408	-5.10035	3.39×10^-07	1.59×10^-05
TRINITY_DN8844_c2_g2	FTC	FT	13.958	329.412	119.109	-4.59746	0.901673	-5.09881	3.42×10^-07	1.60×10^-05
TRINITY_DN3172_c5_g1	FTC	FT	220.943	69.9125	170.599	1.65862	0.325299	5.09876	3.42×10^-07	1.60×10^-05
TRINITY_DN19503_c1_g1	FTC	FT	35.9195	0	23.9463	8.24306	1.61686	5.0982	3.43×10^-07	1.61×10^-05
TRINITY_DN68747_c0_g1	FTC	FT	31.6967	1.94825	21.7806	4.02099	0.788837	5.09737	3.44×10^-07	1.61×10^-05
TRINITY_DN4476_c0_g3	FTC	FT	149.37	0	99.5803	21.4397	4.20655	5.09673	3.46×10^-07	1.62×10^-05
TRINITY_DN26987_c0_g1	FTC	FT	0	178.855	59.6182	-9.63826	1.89123	-5.0963	3.46×10^-07	1.62×10^-05
TRINITY_DN6304_c9_g1	FTC	FT	153.049	0	102.032	21.4361	4.20654	5.09591	3.47×10^-07	1.62×10^-05
TRINITY_DN71574_c1_g1	FTC	FT	158.471	0	105.647	10.3776	2.03662	5.09549	3.48×10^-07	1.62×10^-05
TRINITY_DN36929_c0_g2	FTC	FT	148.817	0	99.2116	21.4259	4.20656	5.09346	3.52×10^-07	1.64×10^-05
TRINITY_DN622_c1_g2	FTC	FT	148.817	0	99.2116	21.4259	4.20656	5.09346	3.52×10^-07	1.64×10^-05
TRINITY_DN3581_c0_g1	FTC	FT	47.9019	810.12	301.974	-4.09052	0.803153	-5.09308	3.52×10^-07	1.64×10^-05
TRINITY_DN46963_c0_g1	FTC	FT	149.945	0	99.9632	21.4225	4.20655	5.09266	3.53×10^-07	1.64×10^-05
TRINITY_DN1814_c4_g1	FTC	FT	138.706	0	92.4709	21.4227	4.20659	5.09265	3.53×10^-07	1.64×10^-05
TRINITY_DN4572_c0_g2	FTC	FT	18.359	94.7287	43.8156	-2.3533	0.462119	-5.09241	3.54×10^-07	1.65×10^-05
TRINITY_DN29_c11_g1	FTC	FT	9.98396	61.35	27.106	-2.5952	0.509745	-5.09116	3.56×10^-07	1.65×10^-05
TRINITY_DN1602_c0_g1	FTC	FT	1761.75	267.409	1263.64	2.71971	0.534326	5.08997	3.58×10^-07	1.66×10^-05
TRINITY_DN69693_c0_g6	FTC	FT	169.359	0	112.906	10.4711	2.05765	5.08883	3.60×10^-07	1.67×10^-05
TRINITY_DN61550_c0_g1	FTC	FT	147.19	0	98.1267	21.4049	4.20656	5.08846	3.61×10^-07	1.68×10^-05
TRINITY_DN37665_c0_g1	FTC	FT	12.5704	104.667	43.2694	-3.05397	0.600398	-5.08658	3.65×10^-07	1.69×10^-05
TRINITY_DN102028_c1_g2	FTC	FT	6.66396	71.3005	28.2095	-3.43791	0.676031	-5.08543	3.67×10^-07	1.70×10^-05
TRINITY_DN66583_c0_g3	FTC	FT	32.1676	0	21.4451	8.0851	1.59006	5.08477	3.68×10^-07	1.71×10^-05
TRINITY_DN39941_c4_g1	FTC	FT	148.144	0	98.7628	21.3888	4.20656	5.08462	3.68×10^-07	1.71×10^-05
TRINITY_DN84102_c0_g1	FTC	FT	31.9253	0	21.2835	8.06892	1.58765	5.08229	3.73×10^-07	1.73×10^-05
TRINITY_DN12721_c0_g2	FTC	FT	44.8915	0	29.9277	8.55387	1.68383	5.08001	3.77×10^-07	1.75×10^-05
TRINITY_DN5616_c0_g5	FTC	FT	0	185.89	61.9634	-9.69396	1.90876	-5.07867	3.80×10^-07	1.76×10^-05
TRINITY_DN1467_c1_g1	FTC	FT	297.329	99.6903	231.449	1.57293	0.309823	5.07688	3.84×10^-07	1.77×10^-05
TRINITY_DN7122_c0_g1	FTC	FT	8.07705	342.726	119.627	-5.36423	1.05663	-5.07672	3.84×10^-07	1.77×10^-05
TRINITY_DN40893_c0_g1	FTC	FT	140.507	0	93.6714	21.3531	4.20659	5.07611	3.85×10^-07	1.78×10^-05
TRINITY_DN61_c84_g1	FTC	FT	67.2535	523.695	219.4	-2.96995	0.585337	-5.07392	3.90×10^-07	1.80×10^-05
TRINITY_DN15922_c0_g4	FTC	FT	10.4689	87.4805	36.1395	-3.07083	0.605236	-5.07377	3.90×10^-07	1.80×10^-05
TRINITY_DN2250_c1_g1	FTC	FT	67.0317	0	44.6878	9.13812	1.80193	5.07131	3.95×10^-07	1.82×10^-05
TRINITY_DN1240_c1_g1	FTC	FT	10.118	155.879	58.7049	-3.89467	0.768192	-5.06992	3.98×10^-07	1.83×10^-05
TRINITY_DN8210_c0_g4	FTC	FT	12.7767	81.3802	35.6445	-2.69132	0.530843	-5.0699	3.98×10^-07	1.83×10^-05
TRINITY_DN1889_c0_g1	FTC	FT	591.416	101.518	428.117	2.54392	0.501924	5.06833	4.01×10^-07	1.84×10^-05
TRINITY_DN15077_c0_g4	FTC	FT	12.722	91.608	39.0173	-2.83713	0.559991	-5.06639	4.05×10^-07	1.86×10^-05
TRINITY_DN20387_c0_g1	FTC	FT	34.0898	0	22.7265	8.1627	1.6112	5.06624	4.06×10^-07	1.86×10^-05
TRINITY_DN3253_c3_g1	FTC	FT	478.802	20.7722	326.125	4.52878	0.894298	5.06406	4.10×10^-07	1.88×10^-05
TRINITY_DN22620_c0_g1	FTC	FT	188.283	23.7638	133.444	2.98817	0.590256	5.0625	4.14×10^-07	1.90×10^-05
TRINITY_DN4544_c2_g1	FTC	FT	3184.14	755.775	2374.68	2.07466	0.409815	5.06244	4.14×10^-07	1.90×10^-05
TRINITY_DN30252_c0_g3	FTC	FT	57.9177	0	38.6118	8.92991	1.76448	5.06093	4.17×10^-07	1.91×10^-05
TRINITY_DN69511_c0_g1	FTC	FT	157.688	0	105.125	10.3704	2.04949	5.05999	4.19×10^-07	1.92×10^-05
TRINITY_DN1754_c7_g1	FTC	FT	97.1314	0	64.7542	9.66722	1.91065	5.05965	4.20×10^-07	1.92×10^-05
TRINITY_DN1498_c10_g1	FTC	FT	59.64	0	39.76	8.96134	1.77153	5.05854	4.22×10^-07	1.93×10^-05
TRINITY_DN61454_c0_g1	FTC	FT	0	472.539	157.513	-11.0399	2.18287	-5.0575	4.25×10^-07	1.94×10^-05
TRINITY_DN98585_c6_g1	FTC	FT	37.0836	0	24.7224	8.29122	1.63958	5.0569	4.26×10^-07	1.94×10^-05
TRINITY_DN3698_c2_g1	FTC	FT	497.66	217.509	404.277	1.19148	0.235638	5.0564	4.27×10^-07	1.95×10^-05
TRINITY_DN2141_c0_g1	FTC	FT	1770.45	584.501	1375.13	1.59926	0.316334	5.0556	4.29×10^-07	1.96×10^-05
TRINITY_DN20753_c3_g1	FTC	FT	83.7668	0	55.8446	9.45773	1.87184	5.05263	4.36×10^-07	1.99×10^-05
TRINITY_DN53035_c0_g1	FTC	FT	0	173.924	57.9747	-9.59793	1.90015	-5.05114	4.39×10^-07	2.00×10^-05
TRINITY_DN97533_c2_g1	FTC	FT	0.229167	78.8534	26.4373	-7.73548	1.53156	-5.05073	4.40×10^-07	2.00×10^-05
TRINITY_DN30100_c0_g2	FTC	FT	0	182.683	60.8944	-9.66886	1.91457	-5.05015	4.41×10^-07	2.01×10^-05
TRINITY_DN25016_c2_g1	FTC	FT	15.2141	67.9088	32.779	-2.16736	0.429355	-5.04795	4.47×10^-07	2.03×10^-05
TRINITY_DN54575_c0_g2	FTC	FT	68.2264	0	45.4842	9.16283	1.81586	5.04601	4.51×10^-07	2.05×10^-05
TRINITY_DN26060_c0_g4	FTC	FT	114.791	0	76.5275	9.90898	1.96444	5.04417	4.55×10^-07	2.07×10^-05
TRINITY_DN4739_c2_g3	FTC	FT	1318.5	580.881	1072.63	1.18316	0.234612	5.04303	4.58×10^-07	2.08×10^-05
TRINITY_DN8061_c4_g1	FTC	FT	0	285.592	95.1973	-10.3135	2.04514	-5.04292	4.58×10^-07	2.08×10^-05
TRINITY_DN92144_c0_g1	FTC	FT	41.1718	0	27.4478	8.42448	1.67085	5.04203	4.61×10^-07	2.09×10^-05
TRINITY_DN94435_c0_g1	FTC	FT	36.0068	3.89651	25.3034	3.20526	0.635716	5.04196	4.61×10^-07	2.09×10^-05
TRINITY_DN2714_c1_g1	FTC	FT	861.111	16.1554	579.459	5.73652	1.13796	5.04107	4.63×10^-07	2.09×10^-05
TRINITY_DN20750_c0_g2	FTC	FT	4.16567	81.7741	30.0351	-4.25552	0.844527	-5.03894	4.68×10^-07	2.12×10^-05
TRINITY_DN23696_c2_g1	FTC	FT	33.8765	0	22.5844	8.14366	1.61659	5.03756	4.72×10^-07	2.13×10^-05
TRINITY_DN14795_c0_g1	FTC	FT	0	171.536	57.1785	-9.57799	1.9014	-5.03734	4.72×10^-07	2.13×10^-05
TRINITY_DN72064_c0_g1	FTC	FT	59.2129	0	39.4753	8.95686	1.77843	5.03639	4.74×10^-07	2.14×10^-05
TRINITY_DN36587_c0_g1	FTC	FT	210.709	6.49418	142.638	5.01925	0.996756	5.03558	4.76×10^-07	2.15×10^-05
TRINITY_DN36332_c2_g1	FTC	FT	71.6403	0	47.7602	9.22895	1.83317	5.03443	4.79×10^-07	2.16×10^-05
TRINITY_DN0_c2_g1	FTC	FT	82.255	680.052	281.521	-3.03862	0.603683	-5.03346	4.82×10^-07	2.17×10^-05
TRINITY_DN2759_c5_g1	FTC	FT	0.935224	70.2909	24.0538	-5.99737	1.192	-5.03134	4.87×10^-07	2.19×10^-05
TRINITY_DN99_c0_g2	FTC	FT	1029.68	54.1109	704.492	4.24952	0.844652	5.03109	4.88×10^-07	2.19×10^-05
TRINITY_DN9259_c1_g1	FTC	FT	0.467612	80.6697	27.2016	-7.0999	1.41168	-5.0294	4.92×10^-07	2.21×10^-05
TRINITY_DN39527_c7_g1	FTC	FT	0	237.478	79.1595	-10.0472	1.999	-5.02612	5.01×10^-07	2.25×10^-05
TRINITY_DN36586_c1_g2	FTC	FT	371.522	101.183	281.409	1.87516	0.37312	5.02561	5.02×10^-07	2.25×10^-05
TRINITY_DN4186_c1_g1	FTC	FT	570.29	210.091	450.224	1.44283	0.28716	5.02448	5.05×10^-07	2.27×10^-05
TRINITY_DN5515_c0_g2	FTC	FT	0	190.862	63.6205	-9.73197	1.93743	-5.02313	5.08×10^-07	2.28×10^-05
TRINITY_DN14765_c1_g1	FTC	FT	469.995	153.494	364.494	1.61653	0.321833	5.02288	5.09×10^-07	2.28×10^-05
TRINITY_DN169_c3_g1	FTC	FT	0	237.863	79.2877	-10.0496	2.00176	-5.02037	5.16×10^-07	2.31×10^-05
TRINITY_DN3031_c0_g3	FTC	FT	173.999	9.86133	119.287	4.14644	0.826219	5.01857	5.21×10^-07	2.33×10^-05
TRINITY_DN80167_c0_g1	FTC	FT	40.1139	2.67771	27.6352	3.93717	0.784544	5.01842	5.21×10^-07	2.33×10^-05
TRINITY_DN62651_c1_g1	FTC	FT	0	394.744	131.581	-10.7803	2.14854	-5.01752	5.23×10^-07	2.34×10^-05
TRINITY_DN23952_c0_g1	FTC	FT	55.2844	0	36.8563	8.85635	1.76509	5.01751	5.23×10^-07	2.34×10^-05
TRINITY_DN3242_c0_g1	FTC	FT	0	203.736	67.9121	-9.82614	1.95917	-5.01545	5.29×10^-07	2.36×10^-05
TRINITY_DN16028_c0_g1	FTC	FT	47.7043	191.378	95.5956	-2.00159	0.399101	-5.01525	5.30×10^-07	2.36×10^-05
TRINITY_DN4020_c2_g1	FTC	FT	30.7166	240.937	100.79	-2.97518	0.593403	-5.01376	5.34×10^-07	2.38×10^-05
TRINITY_DN23275_c1_g1	FTC	FT	65.1545	18.5684	49.6258	1.81964	0.363142	5.01082	5.42×10^-07	2.42×10^-05
TRINITY_DN114208_c0_g1	FTC	FT	264.136	81.2973	203.19	1.70071	0.339636	5.00745	5.52×10^-07	2.46×10^-05
TRINITY_DN4807_c5_g1	FTC	FT	0	333.479	111.16	-10.537	2.10429	-5.00739	5.52×10^-07	2.46×10^-05
TRINITY_DN107685_c0_g3	FTC	FT	3.16204	105.858	37.394	-4.99286	0.997136	-5.0072	5.52×10^-07	2.46×10^-05
TRINITY_DN63784_c0_g1	FTC	FT	74.0693	0	49.3795	9.27736	1.85295	5.00681	5.53×10^-07	2.46×10^-05
TRINITY_DN6159_c1_g2	FTC	FT	5.75591	505.714	172.409	-6.43627	1.2858	-5.00564	5.57×10^-07	2.48×10^-05
TRINITY_DN4631_c3_g1	FTC	FT	0	233.157	77.7191	-10.0207	2.00226	-5.00471	5.59×10^-07	2.48×10^-05
TRINITY_DN81719_c0_g1	FTC	FT	0	233.157	77.7191	-10.0207	2.00226	-5.00471	5.59×10^-07	2.48×10^-05
TRINITY_DN2969_c0_g1	FTC	FT	224.577	557.887	335.68	-1.31389	0.262585	-5.00365	5.63×10^-07	2.50×10^-05
TRINITY_DN11265_c0_g2	FTC	FT	62.4274	0	41.6182	9.02708	1.80418	5.00343	5.63×10^-07	2.50×10^-05
TRINITY_DN16226_c1_g1	FTC	FT	92.1458	0	61.4305	9.59223	1.91763	5.00213	5.67×10^-07	2.51×10^-05
TRINITY_DN22326_c2_g1	FTC	FT	1092.62	278.801	821.349	1.97022	0.393883	5.00203	5.67×10^-07	2.51×10^-05
TRINITY_DN5964_c0_g2	FTC	FT	86.0665	1.8282	57.9871	5.52412	1.10467	5.00068	5.71×10^-07	2.53×10^-05
TRINITY_DN561_c0_g1	FTC	FT	5368.29	1496.29	4077.62	1.84301	0.368714	4.99848	5.78×10^-07	2.56×10^-05
TRINITY_DN920_c1_g1	FTC	FT	36.978	0	24.652	8.28205	1.65772	4.99606	5.85×10^-07	2.59×10^-05
TRINITY_DN124292_c1_g1	FTC	FT	27.9801	0	18.6534	7.88604	1.57891	4.99461	5.90×10^-07	2.60×10^-05
TRINITY_DN3619_c13_g1	FTC	FT	163.473	478.716	268.554	-1.54459	0.309255	-4.99455	5.90×10^-07	2.60×10^-05
TRINITY_DN33036_c2_g1	FTC	FT	42.9463	0	28.6309	8.50013	1.70198	4.99428	5.91×10^-07	2.61×10^-05
TRINITY_DN4013_c0_g1	FTC	FT	39.085	838.24	305.47	-4.43331	0.88778	-4.99371	5.92×10^-07	2.61×10^-05
TRINITY_DN1140_c0_g1	FTC	FT	5486.46	840.482	3937.8	2.70667	0.542175	4.99223	5.97×10^-07	2.63×10^-05
TRINITY_DN66191_c0_g1	FTC	FT	38.5608	2.82234	26.648	3.7405	0.74931	4.99192	5.98×10^-07	2.63×10^-05
TRINITY_DN130033_c5_g1	FTC	FT	0	202.458	67.4859	-9.81715	1.96779	-4.98891	6.07×10^-07	2.67×10^-05
TRINITY_DN16627_c3_g1	FTC	FT	0	167.43	55.81	-9.54303	1.91378	-4.98648	6.15×10^-07	2.70×10^-05
TRINITY_DN84483_c0_g3	FTC	FT	0	167.43	55.81	-9.54303	1.91378	-4.98648	6.15×10^-07	2.70×10^-05
TRINITY_DN7802_c1_g1	FTC	FT	0	167.005	55.6684	-9.53937	1.91341	-4.98553	6.18×10^-07	2.71×10^-05
TRINITY_DN17874_c0_g1	FTC	FT	39.7684	0	26.5123	8.38684	1.68246	4.98485	6.20×10^-07	2.72×10^-05
TRINITY_DN4421_c0_g3	FTC	FT	35.8569	0	23.9046	8.24285	1.65377	4.98429	6.22×10^-07	2.73×10^-05
TRINITY_DN64200_c0_g1	FTC	FT	29.0102	0	19.3401	7.91947	1.58897	4.98402	6.23×10^-07	2.73×10^-05
TRINITY_DN125_c5_g1	FTC	FT	19.5348	327.682	122.25	-4.04313	0.811331	-4.98333	6.25×10^-07	2.74×10^-05
TRINITY_DN57385_c0_g1	FTC	FT	47.0455	0	31.3636	8.62032	1.73149	4.97856	6.41×10^-07	2.81×10^-05
TRINITY_DN59647_c4_g1	FTC	FT	0	355.064	118.355	-10.6276	2.13476	-4.97835	6.41×10^-07	2.81×10^-05
TRINITY_DN2242_c0_g1	FTC	FT	598.849	1997.51	1065.07	-1.7384	0.349204	-4.97819	6.42×10^-07	2.81×10^-05
TRINITY_DN1988_c1_g1	FTC	FT	37.5283	0	25.0188	8.30444	1.66818	4.97814	6.42×10^-07	2.81×10^-05
TRINITY_DN86453_c2_g1	FTC	FT	25.3048	0	16.8699	7.73324	1.55353	4.97785	6.43×10^-07	2.81×10^-05
TRINITY_DN4092_c0_g1	FTC	FT	1312.27	473.17	1032.57	1.47116	0.295549	4.97774	6.43×10^-07	2.81×10^-05
TRINITY_DN1049_c1_g1	FTC	FT	361.724	51.4241	258.291	2.81575	0.566043	4.97445	6.54×10^-07	2.86×10^-05
TRINITY_DN6460_c0_g4	FTC	FT	1.25448	72.9223	25.1438	-5.9215	1.19046	-4.97411	6.55×10^-07	2.86×10^-05
TRINITY_DN44171_c3_g1	FTC	FT	50.7558	0	33.8372	8.73183	1.75613	4.9722	6.62×10^-07	2.89×10^-05
TRINITY_DN2746_c0_g2	FTC	FT	40.0946	0	26.7297	8.39807	1.68916	4.97174	6.64×10^-07	2.89×10^-05
TRINITY_DN57712_c0_g1	FTC	FT	232.999	81.2665	182.422	1.52179	0.30637	4.96717	6.79×10^-07	2.96×10^-05
TRINITY_DN165_c0_g1	FTC	FT	3193.78	1566.7	2651.42	1.02737	0.206998	4.96317	6.94×10^-07	3.02×10^-05
TRINITY_DN9327_c0_g1	FTC	FT	0.238445	78.7951	26.424	-7.7342	1.5586	-4.96227	6.97×10^-07	3.03×10^-05
TRINITY_DN1306_c13_g1	FTC	FT	119.926	9.09186	82.9811	3.71805	0.749372	4.96156	6.99×10^-07	3.04×10^-05
TRINITY_DN15813_c2_g1	FTC	FT	69.5566	0	46.3711	9.18669	1.85158	4.96156	6.99×10^-07	3.04×10^-05
TRINITY_DN72393_c5_g1	FTC	FT	0	198.337	66.1122	-9.78748	1.97296	-4.9608	7.02×10^-07	3.05×10^-05
TRINITY_DN3091_c2_g2	FTC	FT	12.0197	92.9097	38.983	-2.98756	0.602367	-4.9597	7.06×10^-07	3.06×10^-05
TRINITY_DN1983_c6_g1	FTC	FT	86.5101	0	57.6734	9.49943	1.91534	4.95967	7.06×10^-07	3.06×10^-05
TRINITY_DN7594_c0_g1	FTC	FT	27.6531	188.205	81.1704	-2.7506	0.554646	-4.9592	7.08×10^-07	3.07×10^-05
TRINITY_DN9487_c6_g1	FTC	FT	0.783738	247.361	82.9761	-8.57082	1.72863	-4.95815	7.12×10^-07	3.08×10^-05
TRINITY_DN870_c0_g1	FTC	FT	2945.19	1296.07	2395.48	1.18431	0.238883	4.95772	7.13×10^-07	3.09×10^-05
TRINITY_DN22428_c2_g1	FTC	FT	69.2636	4.28125	47.6028	4.03075	0.813105	4.95724	7.15×10^-07	3.09×10^-05
TRINITY_DN3761_c0_g2	FTC	FT	504.428	224.492	411.116	1.16607	0.235331	4.95503	7.23×10^-07	3.13×10^-05
TRINITY_DN28209_c2_g1	FTC	FT	30.0381	0	20.0254	7.9751	1.60963	4.95462	7.25×10^-07	3.13×10^-05
TRINITY_DN12907_c0_g1	FTC	FT	0.633447	62.1995	21.1555	-6.6881	1.35049	-4.95235	7.33×10^-07	3.17×10^-05
TRINITY_DN23608_c0_g1	FTC	FT	18.1721	137.76	58.0348	-2.92616	0.590876	-4.95225	7.34×10^-07	3.17×10^-05
TRINITY_DN4229_c6_g1	FTC	FT	0	332.196	110.732	-10.5315	2.12701	-4.9513	7.37×10^-07	3.18×10^-05
TRINITY_DN6112_c4_g1	FTC	FT	66.0347	0	44.0231	9.11778	1.8419	4.9502	7.41×10^-07	3.20×10^-05
TRINITY_DN1138_c0_g1	FTC	FT	1727.34	339.793	1264.83	2.3454	0.473863	4.94954	7.44×10^-07	3.20×10^-05
TRINITY_DN33594_c4_g1	FTC	FT	0	163.533	54.5111	-9.50906	1.92238	-4.94651	7.56×10^-07	3.25×10^-05
TRINITY_DN60835_c0_g2	FTC	FT	0	163.533	54.5111	-9.50906	1.92238	-4.94651	7.56×10^-07	3.25×10^-05
TRINITY_DN68830_c0_g2	FTC	FT	0	163.533	54.5111	-9.50906	1.92238	-4.94651	7.56×10^-07	3.25×10^-05
TRINITY_DN1570_c1_g1	FTC	FT	17710.5	6743.61	14054.9	1.39297	0.281763	4.94377	7.66×10^-07	3.29×10^-05
TRINITY_DN33001_c1_g1	FTC	FT	0	211.92	70.6401	-9.88295	1.99937	-4.94304	7.69×10^-07	3.30×10^-05
TRINITY_DN28844_c0_g1	FTC	FT	11.3311	103.618	42.0933	-3.1626	0.64023	-4.93979	7.82×10^-07	3.36×10^-05
TRINITY_DN31267_c0_g1	FTC	FT	0	424.535	141.512	-10.8854	2.20497	-4.93675	7.94×10^-07	3.41×10^-05
TRINITY_DN2438_c0_g2	FTC	FT	0.40428	72.824	24.5442	-7.62071	1.54458	-4.93383	8.06×10^-07	3.46×10^-05
TRINITY_DN22409_c2_g1	FTC	FT	0	313.476	104.492	-10.4478	2.11819	-4.93242	8.12×10^-07	3.48×10^-05
TRINITY_DN61097_c0_g1	FTC	FT	0	194.215	64.7385	-9.75719	1.97833	-4.93204	8.14×10^-07	3.48×10^-05
TRINITY_DN81189_c1_g3	FTC	FT	0.229167	106.55	35.6695	-8.1699	1.65703	-4.93046	8.20×10^-07	3.51×10^-05
TRINITY_DN24565_c3_g1	FTC	FT	0	162.148	54.0494	-9.49681	1.92654	-4.92946	8.25×10^-07	3.53×10^-05
TRINITY_DN11490_c0_g1	FTC	FT	0	505.176	168.392	-11.1363	2.26033	-4.92684	8.36×10^-07	3.57×10^-05
TRINITY_DN17992_c1_g1	FTC	FT	2.73921	100.149	35.2091	-5.07936	1.03097	-4.92678	8.36×10^-07	3.57×10^-05
TRINITY_DN47763_c0_g1	FTC	FT	7.99051	87.5823	34.5211	-3.39756	0.689643	-4.92654	8.37×10^-07	3.57×10^-05
TRINITY_DN23022_c0_g1	FTC	FT	58.6659	0	39.1106	8.94525	1.81608	4.92558	8.41×10^-07	3.59×10^-05
TRINITY_DN31039_c0_g1	FTC	FT	0	193.871	64.6236	-9.75462	1.98052	-4.92529	8.42×10^-07	3.59×10^-05
TRINITY_DN19763_c2_g1	FTC	FT	34.0885	0	22.7257	8.16885	1.65923	4.92327	8.51×10^-07	3.63×10^-05
TRINITY_DN14372_c0_g1	FTC	FT	0	218.59	72.8633	-9.92765	2.01825	-4.91895	8.70×10^-07	3.71×10^-05
TRINITY_DN13394_c1_g1	FTC	FT	0.458334	199.363	66.7599	-8.42808	1.71363	-4.91825	8.73×10^-07	3.72×10^-05
TRINITY_DN7186_c0_g1	FTC	FT	45.5712	0.954119	30.6988	5.57164	1.13292	4.91796	8.75×10^-07	3.72×10^-05
TRINITY_DN10313_c0_g2	FTC	FT	93.2277	0	62.1518	20.6878	4.20687	4.91762	8.76×10^-07	3.72×10^-05
TRINITY_DN42656_c0_g2	FTC	FT	0	256.639	85.5463	-10.1593	2.06703	-4.91492	8.88×10^-07	3.77×10^-05
TRINITY_DN9732_c8_g1	FTC	FT	0	179.55	59.8499	-9.64391	1.96375	-4.91097	9.06×10^-07	3.85×10^-05
TRINITY_DN35755_c0_g1	FTC	FT	26.7164	0	17.8109	7.82	1.59259	4.91023	9.10×10^-07	3.86×10^-05
TRINITY_DN39068_c1_g1	FTC	FT	62.7363	0	41.8242	9.03587	1.84029	4.91003	9.11×10^-07	3.86×10^-05
TRINITY_DN31933_c2_g1	FTC	FT	0	159.982	53.3272	-9.47738	1.93102	-4.90798	9.20×10^-07	3.90×10^-05
TRINITY_DN5203_c2_g3	FTC	FT	0	159.982	53.3272	-9.47738	1.93102	-4.90798	9.20×10^-07	3.90×10^-05
TRINITY_DN21157_c0_g1	FTC	FT	37.2853	215.158	96.576	-2.52926	0.515382	-4.90755	9.22×10^-07	3.90×10^-05
TRINITY_DN3902_c1_g1	FTC	FT	49.8988	301.271	133.69	-2.60802	0.531716	-4.90491	9.35×10^-07	3.96×10^-05
TRINITY_DN123_c4_g1	FTC	FT	0	166.993	55.6642	-9.5393	1.94496	-4.90462	9.36×10^-07	3.96×10^-05
TRINITY_DN102982_c0_g1	FTC	FT	28.4718	185.404	80.7824	-2.69711	0.550116	-4.90281	9.45×10^-07	3.99×10^-05
TRINITY_DN9636_c0_g1	FTC	FT	1722.17	92.1065	1178.81	4.22501	0.862238	4.90005	9.58×10^-07	4.05×10^-05
TRINITY_DN4280_c0_g2	FTC	FT	9.69253	84.1843	34.5231	-3.08332	0.629372	-4.89904	9.63×10^-07	4.07×10^-05
TRINITY_DN101836_c0_g1	FTC	FT	5.4002	68.3981	26.3995	-3.67487	0.750656	-4.89554	9.80×10^-07	4.14×10^-05
TRINITY_DN5021_c0_g2	FTC	FT	147.763	0	98.5086	10.2741	2.0987	4.89548	9.81×10^-07	4.14×10^-05
TRINITY_DN2971_c3_g1	FTC	FT	0	192.677	64.2255	-9.74571	1.99086	-4.89523	9.82×10^-07	4.14×10^-05
TRINITY_DN7108_c7_g1	FTC	FT	0	189.14	63.0467	-9.71898	1.98541	-4.89521	9.82×10^-07	4.14×10^-05
TRINITY_DN19444_c0_g1	FTC	FT	1545.76	635.506	1242.34	1.28169	0.261857	4.89461	9.85×10^-07	4.15×10^-05
TRINITY_DN426_c8_g1	FTC	FT	0	158.683	52.8942	-9.46562	1.93406	-4.89417	9.87×10^-07	4.15×10^-05
TRINITY_DN4676_c6_g1	FTC	FT	27.884	0	18.5893	7.86598	1.60865	4.88979	1.01×10^-06	4.24×10^-05
TRINITY_DN2200_c1_g1	FTC	FT	934.197	428.376	765.59	1.12574	0.230255	4.8891	1.01×10^-06	4.26×10^-05
TRINITY_DN36398_c0_g1	FTC	FT	19.7935	87.6869	42.4246	-2.14869	0.439498	-4.88898	1.01×10^-06	4.26×10^-05
TRINITY_DN4749_c0_g2	FTC	FT	1.99151	73.5289	25.8373	-5.17834	1.05964	-4.88687	1.02×10^-06	4.30×10^-05
TRINITY_DN114718_c0_g2	FTC	FT	0	300.433	100.144	-10.3865	2.12544	-4.88673	1.03×10^-06	4.30×10^-05
TRINITY_DN9368_c1_g1	FTC	FT	27.2546	144.552	66.3538	-2.40581	0.492323	-4.88664	1.03×10^-06	4.30×10^-05
TRINITY_DN6744_c0_g3	FTC	FT	0	192.631	64.2105	-9.74527	1.9943	-4.88656	1.03×10^-06	4.30×10^-05
TRINITY_DN7179_c5_g1	FTC	FT	28.7528	0	19.1686	7.92295	1.6215	4.88619	1.03×10^-06	4.31×10^-05
TRINITY_DN111182_c0_g1	FTC	FT	59.4418	0	39.6279	8.9616	1.83467	4.88458	1.04×10^-06	4.34×10^-05
TRINITY_DN52024_c0_g1	FTC	FT	60.317	0	40.2113	8.9861	1.84001	4.88373	1.04×10^-06	4.35×10^-05
TRINITY_DN24304_c0_g1	FTC	FT	128.361	1.90824	86.2102	6.06672	1.24232	4.88339	1.04×10^-06	4.36×10^-05
TRINITY_DN17810_c6_g1	FTC	FT	0	157.642	52.5474	-9.45615	1.93717	-4.88141	1.05×10^-06	4.40×10^-05
TRINITY_DN4827_c7_g2	FTC	FT	0	164.435	54.8116	-9.51703	1.95013	-4.88019	1.06×10^-06	4.43×10^-05
TRINITY_DN10716_c1_g1	FTC	FT	0.238445	70.5711	23.6827	-7.57537	1.55258	-4.87922	1.07×10^-06	4.45×10^-05
TRINITY_DN12705_c0_g2	FTC	FT	4845.31	57.3672	3249.33	6.40007	1.31191	4.87844	1.07×10^-06	4.46×10^-05
TRINITY_DN4434_c4_g1	FTC	FT	0	167.452	55.8172	-9.54319	1.95647	-4.87776	1.07×10^-06	4.47×10^-05
TRINITY_DN21083_c0_g1	FTC	FT	52.2797	2.33299	35.6308	4.49635	0.921909	4.87721	1.08×10^-06	4.48×10^-05
TRINITY_DN44329_c0_g1	FTC	FT	1.55626	49.9898	17.7008	-4.88339	1.00164	-4.8754	1.09×10^-06	4.52×10^-05
TRINITY_DN31844_c1_g1	FTC	FT	25.3019	0	16.8679	7.72983	1.58576	4.87452	1.09×10^-06	4.54×10^-05
TRINITY_DN10742_c3_g1	FTC	FT	35.8201	1.56352	24.4012	4.47849	0.918954	4.87346	1.10×10^-06	4.56×10^-05
TRINITY_DN4474_c0_g1	FTC	FT	106.873	670.433	294.727	-2.64723	0.543416	-4.87146	1.11×10^-06	4.61×10^-05
TRINITY_DN89800_c0_g1	FTC	FT	0	250.504	83.5013	-10.1243	2.08023	-4.8669	1.13×10^-06	4.71×10^-05
TRINITY_DN6630_c4_g1	FTC	FT	0	246.264	82.0879	-10.0997	2.07526	-4.86672	1.13×10^-06	4.71×10^-05
TRINITY_DN25015_c6_g1	FTC	FT	0	186.238	62.0793	-9.69667	1.99266	-4.8662	1.14×10^-06	4.72×10^-05
TRINITY_DN23170_c0_g1	FTC	FT	8.03529	168.737	61.6026	-4.34483	0.892905	-4.86595	1.14×10^-06	4.72×10^-05
TRINITY_DN11879_c0_g1	FTC	FT	40.5324	0	27.0216	8.41531	1.72949	4.86578	1.14×10^-06	4.73×10^-05
TRINITY_DN89031_c0_g3	FTC	FT	24.5504	0	16.3669	7.69334	1.58113	4.86571	1.14×10^-06	4.73×10^-05
TRINITY_DN10173_c6_g1	FTC	FT	0	209.643	69.8809	-9.86736	2.02842	-4.86454	1.15×10^-06	4.75×10^-05
TRINITY_DN8631_c1_g1	FTC	FT	0	209.643	69.8809	-9.86736	2.02842	-4.86454	1.15×10^-06	4.75×10^-05
TRINITY_DN29177_c0_g1	FTC	FT	44.222	0	29.4813	8.53451	1.75457	4.86417	1.15×10^-06	4.75×10^-05
TRINITY_DN9828_c1_g1	FTC	FT	0	212.017	70.6724	-9.88371	2.03216	-4.86365	1.15×10^-06	4.76×10^-05
TRINITY_DN6464_c3_g1	FTC	FT	102.18	251.408	151.923	-1.29823	0.266953	-4.86313	1.16×10^-06	4.77×10^-05
TRINITY_DN3778_c2_g1	FTC	FT	1081.83	371.461	845.039	1.54209	0.317293	4.86015	1.17×10^-06	4.84×10^-05
TRINITY_DN130741_c0_g1	FTC	FT	0	155.436	51.8119	-9.43579	1.94185	-4.85919	1.18×10^-06	4.86×10^-05
TRINITY_DN16696_c2_g1	FTC	FT	0	155.436	51.8119	-9.43579	1.94185	-4.85919	1.18×10^-06	4.86×10^-05
TRINITY_DN43805_c0_g2	FTC	FT	0	155.436	51.8119	-9.43579	1.94185	-4.85919	1.18×10^-06	4.86×10^-05
TRINITY_DN5678_c0_g7	FTC	FT	15.2631	73.3688	34.6317	-2.23878	0.460899	-4.85742	1.19×10^-06	4.90×10^-05
TRINITY_DN29790_c2_g1	FTC	FT	13.4912	114.642	47.2082	-3.05715	0.629495	-4.85652	1.19×10^-06	4.92×10^-05
TRINITY_DN28512_c0_g2	FTC	FT	51.5086	0	34.3391	8.75553	1.8032	4.85554	1.20×10^-06	4.94×10^-05
TRINITY_DN34948_c0_g1	FTC	FT	19.1324	120.278	52.8475	-2.65834	0.547505	-4.85537	1.20×10^-06	4.94×10^-05
TRINITY_DN9763_c1_g1	FTC	FT	1.43887	67.2594	23.379	-5.72351	1.17913	-4.85402	1.21×10^-06	4.97×10^-05
TRINITY_DN4888_c1_g5	FTC	FT	24.379	0	16.2526	7.67618	1.58326	4.84834	1.24×10^-06	5.11×10^-05
TRINITY_DN34166_c0_g3	FTC	FT	1.72824	86.4092	29.9552	-5.62471	1.16014	-4.84832	1.25×10^-06	5.11×10^-05
TRINITY_DN3286_c0_g2	FTC	FT	1.62272	138.68	47.3085	-6.25206	1.28986	-4.84707	1.25×10^-06	5.14×10^-05
TRINITY_DN499_c0_g2	FTC	FT	4.80839	61.8731	23.83	-3.65694	0.75454	-4.84659	1.26×10^-06	5.15×10^-05
TRINITY_DN18910_c0_g1	FTC	FT	293.494	0	195.663	11.2647	2.32455	4.84596	1.26×10^-06	5.16×10^-05
TRINITY_DN1395_c0_g1	FTC	FT	3603.77	815.241	2674.26	2.1441	0.442458	4.8459	1.26×10^-06	5.16×10^-05
TRINITY_DN295_c0_g2	FTC	FT	0.391869	68.4782	23.0873	-7.5319	1.55462	-4.84484	1.27×10^-06	5.19×10^-05
TRINITY_DN8395_c14_g1	FTC	FT	106.194	17.1896	76.5257	2.62971	0.542789	4.84482	1.27×10^-06	5.19×10^-05
TRINITY_DN4522_c0_g3	FTC	FT	27.2349	0	18.1566	7.84794	1.62003	4.84432	1.27×10^-06	5.20×10^-05
TRINITY_DN76872_c0_g1	FTC	FT	0	240.924	80.3079	-10.0681	2.0794	-4.84184	1.29×10^-06	5.26×10^-05
TRINITY_DN3321_c2_g1	FTC	FT	29.3408	0	19.5605	7.95507	1.64362	4.83998	1.30×10^-06	5.30×10^-05
TRINITY_DN7773_c1_g1	FTC	FT	0	165.663	55.2211	-9.5277	1.96863	-4.83976	1.30×10^-06	5.30×10^-05
TRINITY_DN61_c28_g1	FTC	FT	0	205.321	68.4405	-9.83731	2.03263	-4.8397	1.30×10^-06	5.30×10^-05
TRINITY_DN6952_c0_g3	FTC	FT	0	205.321	68.4405	-9.83731	2.03263	-4.8397	1.30×10^-06	5.30×10^-05
TRINITY_DN874_c4_g1	FTC	FT	938.861	97.6528	658.458	3.26539	0.674746	4.83943	1.30×10^-06	5.31×10^-05
TRINITY_DN1662_c0_g1	FTC	FT	1942.19	422.525	1435.63	2.20008	0.454619	4.8394	1.30×10^-06	5.31×10^-05
TRINITY_DN38283_c1_g2	FTC	FT	40.1103	0	26.7402	8.40245	1.73631	4.83925	1.30×10^-06	5.31×10^-05
TRINITY_DN1482_c1_g1	FTC	FT	133.907	0	89.2713	10.1347	2.09445	4.83886	1.31×10^-06	5.32×10^-05
TRINITY_DN31108_c0_g1	FTC	FT	0	154.845	51.6148	-9.43032	1.94913	-4.83822	1.31×10^-06	5.33×10^-05
TRINITY_DN6695_c0_g5	FTC	FT	18.1489	86.5264	40.9414	-2.26793	0.468776	-4.83798	1.31×10^-06	5.33×10^-05
TRINITY_DN6441_c5_g1	FTC	FT	33.7525	0	22.5017	8.14057	1.68271	4.83776	1.31×10^-06	5.34×10^-05
TRINITY_DN1264_c0_g1	FTC	FT	0	157.651	52.5505	-9.45625	1.95499	-4.83698	1.32×10^-06	5.35×10^-05
TRINITY_DN21_c0_g2	FTC	FT	365.846	156.935	296.209	1.22433	0.253135	4.83667	1.32×10^-06	5.36×10^-05
TRINITY_DN127_c5_g1	FTC	FT	12.2139	74.9415	33.1231	-2.59615	0.536833	-4.83604	1.32×10^-06	5.37×10^-05
TRINITY_DN33137_c2_g1	FTC	FT	0	182.421	60.8071	-9.6668	1.99905	-4.83569	1.33×10^-06	5.38×10^-05
TRINITY_DN1670_c2_g1	FTC	FT	768.689	41.0025	526.127	4.22748	0.87426	4.8355	1.33×10^-06	5.38×10^-05
TRINITY_DN472_c0_g3	FTC	FT	1690.87	786.11	1389.29	1.10485	0.22851	4.83502	1.33×10^-06	5.39×10^-05
TRINITY_DN17334_c3_g1	FTC	FT	30.256	0	20.1707	7.97812	1.65081	4.83286	1.35×10^-06	5.45×10^-05
TRINITY_DN27735_c0_g1	FTC	FT	12.0799	66.8592	30.3397	-2.50139	0.517644	-4.83227	1.35×10^-06	5.46×10^-05
TRINITY_DN21403_c0_g4	FTC	FT	0	153.647	51.2158	-9.41909	1.94948	-4.83159	1.35×10^-06	5.48×10^-05
TRINITY_DN22092_c1_g1	FTC	FT	30.6522	0	20.4348	7.99842	1.65547	4.83151	1.36×10^-06	5.48×10^-05
TRINITY_DN25354_c0_g1	FTC	FT	36.3224	0	24.2149	8.24994	1.70808	4.82993	1.37×10^-06	5.52×10^-05
TRINITY_DN34887_c0_g2	FTC	FT	0	171.379	57.1263	-9.57663	1.98344	-4.82829	1.38×10^-06	5.56×10^-05
TRINITY_DN6945_c0_g1	FTC	FT	488.785	148.446	375.338	1.72004	0.356272	4.82788	1.38×10^-06	5.57×10^-05
TRINITY_DN479_c7_g1	FTC	FT	56.3934	442.51	185.099	-2.9785	0.617014	-4.82727	1.38×10^-06	5.58×10^-05
TRINITY_DN21543_c1_g1	FTC	FT	32.8341	0	21.8894	8.10155	1.67836	4.82707	1.39×10^-06	5.58×10^-05
TRINITY_DN12612_c0_g1	FTC	FT	54.9989	6.67883	38.8922	3.03352	0.628528	4.82639	1.39×10^-06	5.60×10^-05
TRINITY_DN4433_c3_g1	FTC	FT	27.9794	0	18.6529	7.87605	1.63197	4.8261	1.39×10^-06	5.61×10^-05
TRINITY_DN69693_c0_g7	FTC	FT	0	158.975	52.9916	-9.46831	1.96268	-4.82417	1.41×10^-06	5.66×10^-05
TRINITY_DN39503_c0_g1	FTC	FT	34.1066	0	22.7377	8.15122	1.69011	4.82289	1.41×10^-06	5.69×10^-05
TRINITY_DN56085_c1_g1	FTC	FT	34.1066	0	22.7377	8.15122	1.69011	4.82289	1.41×10^-06	5.69×10^-05
TRINITY_DN3797_c0_g1	FTC	FT	358.848	116.418	278.038	1.62231	0.336506	4.82104	1.43×10^-06	5.74×10^-05
TRINITY_DN110837_c0_g1	FTC	FT	247.647	0	165.098	11.0211	2.28639	4.82028	1.43×10^-06	5.76×10^-05
TRINITY_DN3888_c1_g1	FTC	FT	28.1217	229.285	95.176	-3.00441	0.623313	-4.82006	1.44×10^-06	5.76×10^-05
TRINITY_DN3792_c0_g1	FTC	FT	17.3067	1416.95	483.855	-6.3352	1.31456	-4.81924	1.44×10^-06	5.78×10^-05
TRINITY_DN33738_c0_g1	FTC	FT	549.391	49.6633	382.815	3.46656	0.719379	4.81883	1.44×10^-06	5.79×10^-05
TRINITY_DN23704_c3_g2	FTC	FT	29.8347	0	19.8898	7.97744	1.65616	4.81682	1.46×10^-06	5.84×10^-05
TRINITY_DN3795_c1_g1	FTC	FT	52.6582	358.571	154.629	-2.7573	0.572757	-4.81409	1.48×10^-06	5.92×10^-05
TRINITY_DN23325_c0_g1	FTC	FT	28.1498	0	18.7666	7.87058	1.63512	4.81345	1.48×10^-06	5.94×10^-05
TRINITY_DN3576_c0_g1	FTC	FT	674.686	208.953	519.442	1.68958	0.351061	4.81277	1.49×10^-06	5.95×10^-05
TRINITY_DN4684_c1_g3	FTC	FT	1606.74	2.33299	1071.94	9.43248	1.96036	4.8116	1.50×10^-06	5.98×10^-05
TRINITY_DN8394_c3_g1	FTC	FT	1.09793	60.2176	20.8045	-5.70652	1.18614	-4.811	1.50×10^-06	6.00×10^-05
TRINITY_DN4554_c1_g1	FTC	FT	61.2375	1.03415	41.1697	5.93241	1.2336	4.80901	1.52×10^-06	6.06×10^-05
TRINITY_DN26508_c0_g2	FTC	FT	62.0325	9.74127	44.6021	2.67463	0.556322	4.8077	1.53×10^-06	6.09×10^-05
TRINITY_DN17571_c0_g2	FTC	FT	0	200.695	66.8985	-9.80443	2.03939	-4.80752	1.53×10^-06	6.10×10^-05
TRINITY_DN34302_c2_g1	FTC	FT	36.3806	0	24.2537	8.24988	1.71621	4.80704	1.53×10^-06	6.11×10^-05
TRINITY_DN36616_c0_g1	FTC	FT	56.9632	0	37.9755	8.90484	1.85277	4.80624	1.54×10^-06	6.13×10^-05
TRINITY_DN29659_c0_g1	FTC	FT	9.48604	103.814	40.9288	-3.48562	0.725359	-4.80537	1.54×10^-06	6.15×10^-05
TRINITY_DN10652_c10_g1	FTC	FT	0	225.144	75.048	-9.97038	2.07488	-4.80528	1.55×10^-06	6.15×10^-05
TRINITY_DN14770_c0_g3	FTC	FT	0	873.643	291.214	-11.9265	2.48308	-4.80309	1.56×10^-06	6.21×10^-05
TRINITY_DN20944_c3_g1	FTC	FT	55.7613	0	37.1742	8.8752	1.84896	4.80011	1.59×10^-06	6.30×10^-05
TRINITY_DN17247_c3_g1	FTC	FT	28.7824	0	19.1883	7.91122	1.64875	4.79831	1.60×10^-06	6.36×10^-05
TRINITY_DN1467_c4_g1	FTC	FT	15.4576	72.6948	34.5367	-2.26305	0.471694	-4.79772	1.60×10^-06	6.37×10^-05
TRINITY_DN4069_c0_g1	FTC	FT	1010.37	341.292	787.344	1.56471	0.326207	4.79667	1.61×10^-06	6.40×10^-05
TRINITY_DN33254_c3_g1	FTC	FT	1.39356	96.6833	33.1568	-5.92754	1.23581	-4.79648	1.61×10^-06	6.41×10^-05
TRINITY_DN4277_c0_g1	FTC	FT	488.86	1667.01	881.576	-1.7715	0.369404	-4.79556	1.62×10^-06	6.43×10^-05
TRINITY_DN1251_c2_g1	FTC	FT	170.029	0.994136	113.684	7.43289	1.55005	4.79526	1.62×10^-06	6.44×10^-05
TRINITY_DN2801_c1_g4	FTC	FT	490.051	77.5826	352.562	2.66102	0.555031	4.79437	1.63×10^-06	6.46×10^-05
TRINITY_DN63003_c0_g1	FTC	FT	27.5746	0	18.383	7.86059	1.63983	4.79354	1.64×10^-06	6.48×10^-05
TRINITY_DN17232_c0_g1	FTC	FT	23.7574	706.94	251.485	-4.88464	1.01916	-4.7928	1.64×10^-06	6.49×10^-05
TRINITY_DN7710_c1_g3	FTC	FT	1.87045	137.074	46.9382	-6.0439	1.26107	-4.79266	1.65×10^-06	6.49×10^-05
TRINITY_DN14504_c1_g3	FTC	FT	0	149.591	49.8636	-9.3805	1.95735	-4.79245	1.65×10^-06	6.49×10^-05
TRINITY_DN4694_c5_g1	FTC	FT	0	149.591	49.8636	-9.3805	1.95735	-4.79245	1.65×10^-06	6.49×10^-05
TRINITY_DN54350_c0_g1	FTC	FT	0	149.591	49.8636	-9.3805	1.95735	-4.79245	1.65×10^-06	6.49×10^-05
TRINITY_DN65097_c0_g1	FTC	FT	0	149.591	49.8636	-9.3805	1.95735	-4.79245	1.65×10^-06	6.49×10^-05
TRINITY_DN93521_c3_g1	FTC	FT	0	149.591	49.8636	-9.3805	1.95735	-4.79245	1.65×10^-06	6.49×10^-05
TRINITY_DN56480_c2_g1	FTC	FT	0	161.462	53.8207	-9.49064	1.98038	-4.79232	1.65×10^-06	6.49×10^-05
TRINITY_DN10711_c2_g1	FTC	FT	2.33385	99.7303	34.7993	-5.41263	1.13023	-4.78897	1.68×10^-06	6.60×10^-05
TRINITY_DN16603_c1_g1	FTC	FT	0	160.428	53.476	-9.48137	1.97995	-4.7887	1.68×10^-06	6.61×10^-05
TRINITY_DN17707_c2_g1	FTC	FT	33.6871	0	22.4581	8.13293	1.69854	4.78819	1.68×10^-06	6.62×10^-05
TRINITY_DN14060_c1_g3	FTC	FT	28.6888	0	19.1258	7.92281	1.65477	4.78787	1.69×10^-06	6.63×10^-05
TRINITY_DN1522_c0_g2	FTC	FT	155.577	413.322	241.492	-1.40238	0.292998	-4.78629	1.70×10^-06	6.67×10^-05
TRINITY_DN4986_c0_g1	FTC	FT	2389.49	857.869	1878.95	1.47812	0.308828	4.78621	1.70×10^-06	6.67×10^-05
TRINITY_DN25503_c0_g2	FTC	FT	69.2862	11.4894	50.0206	2.59044	0.541384	4.78484	1.71×10^-06	6.72×10^-05
TRINITY_DN59394_c0_g1	FTC	FT	68.0288	2773.91	969.989	-5.34396	1.11741	-4.78246	1.73×10^-06	6.79×10^-05
TRINITY_DN18090_c0_g1	FTC	FT	40.5757	0	27.0504	8.41609	1.75985	4.78229	1.73×10^-06	6.80×10^-05
TRINITY_DN3888_c5_g1	FTC	FT	2.98586	41.4273	15.7997	-3.80796	0.796439	-4.78123	1.74×10^-06	6.83×10^-05
TRINITY_DN9887_c1_g2	FTC	FT	66.0104	0	44.007	9.11715	1.90726	4.78024	1.75×10^-06	6.85×10^-05
TRINITY_DN1552_c0_g2	FTC	FT	20.2503	171.406	70.6357	-3.05048	0.638146	-4.78021	1.75×10^-06	6.85×10^-05
TRINITY_DN3824_c0_g1	FTC	FT	52.2638	171.222	91.9165	-1.71045	0.357946	-4.77852	1.77×10^-06	6.91×10^-05
TRINITY_DN4956_c3_g1	FTC	FT	0	358.538	119.513	-10.6416	2.22751	-4.77736	1.78×10^-06	6.95×10^-05
TRINITY_DN35427_c0_g1	FTC	FT	27.8463	0	18.5642	7.85533	1.64444	4.77689	1.78×10^-06	6.96×10^-05
TRINITY_DN5826_c0_g1	FTC	FT	23.6345	84.449	43.906	-1.85429	0.388192	-4.77672	1.78×10^-06	6.96×10^-05
TRINITY_DN1267_c6_g1	FTC	FT	419.204	53.5416	297.316	2.96762	0.621292	4.77652	1.78×10^-06	6.96×10^-05
TRINITY_DN10687_c0_g1	FTC	FT	35.9953	0	23.9969	8.23236	1.72371	4.77596	1.79×10^-06	6.98×10^-05
TRINITY_DN86597_c0_g1	FTC	FT	101.193	0	67.4619	9.72652	2.03666	4.77572	1.79×10^-06	6.98×10^-05
TRINITY_DN4820_c2_g1	FTC	FT	34.482	0	22.988	8.18308	1.71411	4.77394	1.81×10^-06	7.04×10^-05
TRINITY_DN8350_c0_g2	FTC	FT	49.0128	0	32.6752	8.67964	1.81859	4.77273	1.82×10^-06	7.08×10^-05
TRINITY_DN1910_c0_g1	FTC	FT	40.528	769.455	283.504	-4.25993	0.892568	-4.77267	1.82×10^-06	7.08×10^-05
TRINITY_DN14310_c1_g3	FTC	FT	35.99	0	23.9933	8.2297	1.72437	4.77258	1.82×10^-06	7.08×10^-05
TRINITY_DN66755_c1_g1	FTC	FT	5.4345	55.2651	22.0447	-3.40379	0.713434	-4.77099	1.83×10^-06	7.13×10^-05
TRINITY_DN31665_c0_g1	FTC	FT	31.2681	0	20.8454	8.03028	1.68324	4.77074	1.84×10^-06	7.14×10^-05
TRINITY_DN34480_c1_g1	FTC	FT	31.5315	0	21.021	8.05811	1.68932	4.77003	1.84×10^-06	7.16×10^-05
TRINITY_DN6899_c2_g2	FTC	FT	0	257.667	85.889	-10.165	2.13124	-4.76953	1.85×10^-06	7.17×10^-05
TRINITY_DN703_c3_g1	FTC	FT	11.8451	72.6548	32.115	-2.576	0.540125	-4.76927	1.85×10^-06	7.18×10^-05
TRINITY_DN18673_c0_g1	FTC	FT	463.739	125.999	351.159	1.88021	0.394281	4.7687	1.85×10^-06	7.19×10^-05
TRINITY_DN41236_c0_g1	FTC	FT	53.7171	0	35.8114	8.81005	1.84763	4.76831	1.86×10^-06	7.20×10^-05
TRINITY_DN34100_c1_g1	FTC	FT	3022.89	816.864	2287.55	1.88759	0.39587	4.76821	1.86×10^-06	7.20×10^-05
TRINITY_DN25404_c0_g1	FTC	FT	78.219	0	52.146	9.35421	1.96286	4.76562	1.88×10^-06	7.29×10^-05
TRINITY_DN20096_c0_g1	FTC	FT	94.3734	0	62.9156	9.62571	2.02053	4.76396	1.90×10^-06	7.35×10^-05
TRINITY_DN29727_c0_g1	FTC	FT	36.1174	1.2188	24.4845	4.82752	1.01381	4.76174	1.92×10^-06	7.43×10^-05
TRINITY_DN5421_c0_g1	FTC	FT	127.577	377.361	210.838	-1.5713	0.33	-4.7615	1.92×10^-06	7.43×10^-05
TRINITY_DN57626_c0_g1	FTC	FT	43.8314	0	29.2209	8.51618	1.78866	4.7612	1.92×10^-06	7.44×10^-05
TRINITY_DN9013_c0_g1	FTC	FT	0	155.682	51.894	-9.43805	1.98242	-4.76088	1.93×10^-06	7.45×10^-05
TRINITY_DN98370_c0_g1	FTC	FT	0	148.615	49.5383	-9.37108	1.96846	-4.76062	1.93×10^-06	7.45×10^-05
TRINITY_DN55282_c1_g1	FTC	FT	42.918	0	28.612	8.49202	1.78496	4.75754	1.96×10^-06	7.56×10^-05
TRINITY_DN15479_c0_g1	FTC	FT	397.15	1096.69	630.331	-1.46599	0.308184	-4.75686	1.97×10^-06	7.58×10^-05
TRINITY_DN12316_c3_g1	FTC	FT	0	146.344	48.7813	-9.34883	1.96628	-4.75458	1.99×10^-06	7.66×10^-05
TRINITY_DN5649_c3_g1	FTC	FT	36.9901	0	24.6601	8.28541	1.74264	4.75452	1.99×10^-06	7.66×10^-05
TRINITY_DN707_c0_g1	FTC	FT	633.585	2146.96	1138.04	-1.76126	0.37046	-4.75425	1.99×10^-06	7.67×10^-05
TRINITY_DN14955_c0_g1	FTC	FT	39.6458	0	26.4305	8.38449	1.76376	4.75377	2.00×10^-06	7.69×10^-05
TRINITY_DN7627_c0_g2	FTC	FT	86.3206	2.51764	58.3863	5.09227	1.07138	4.75299	2.00×10^-06	7.71×10^-05
TRINITY_DN2330_c3_g1	FTC	FT	20.1381	108.013	49.4296	-2.40036	0.505045	-4.75278	2.01×10^-06	7.71×10^-05
TRINITY_DN6086_c4_g1	FTC	FT	39.8812	151.859	77.2072	-1.91069	0.402073	-4.75209	2.01×10^-06	7.74×10^-05
TRINITY_DN3495_c0_g1	FTC	FT	72.3416	212.313	118.999	-1.54889	0.326008	-4.75109	2.02×10^-06	7.77×10^-05
TRINITY_DN4947_c0_g1	FTC	FT	463.864	200.901	376.21	1.20808	0.254329	4.75006	2.03×10^-06	7.80×10^-05
TRINITY_DN22568_c0_g1	FTC	FT	0	264.284	88.0945	-10.2015	2.14782	-4.74971	2.04×10^-06	7.81×10^-05
TRINITY_DN9793_c0_g3	FTC	FT	29.3371	3.28711	20.6538	3.18259	0.670084	4.74954	2.04×10^-06	7.81×10^-05
TRINITY_DN4051_c1_g6	FTC	FT	174.643	67.6687	138.985	1.37086	0.288791	4.74689	2.07×10^-06	7.91×10^-05
TRINITY_DN15407_c1_g2	FTC	FT	25.7064	329.541	126.985	-3.66745	0.772725	-4.74613	2.07×10^-06	7.94×10^-05
TRINITY_DN67482_c0_g4	FTC	FT	37.1538	0	24.7692	8.29255	1.74757	4.7452	2.08×10^-06	7.97×10^-05
TRINITY_DN27795_c0_g1	FTC	FT	4.97002	92.5747	34.1716	-4.28139	0.90235	-4.74472	2.09×10^-06	7.99×10^-05
TRINITY_DN15124_c0_g1	FTC	FT	29.7846	0	19.8564	7.9693	1.68003	4.74356	2.10×10^-06	8.03×10^-05
TRINITY_DN331_c0_g1	FTC	FT	1406.91	699.836	1171.22	1.00705	0.212333	4.7428	2.11×10^-06	8.05×10^-05
TRINITY_DN35623_c0_g1	FTC	FT	47.6734	0	31.7823	8.63933	1.8216	4.74271	2.11×10^-06	8.05×10^-05
TRINITY_DN22908_c0_g2	FTC	FT	18.695	93.4608	43.6169	-2.3026	0.485968	-4.73817	2.16×10^-06	8.23×10^-05
TRINITY_DN25340_c0_g2	FTC	FT	7.82241	83.5503	33.065	-3.42826	0.723702	-4.73712	2.17×10^-06	8.27×10^-05
TRINITY_DN307_c2_g2	FTC	FT	6.63546	173.475	62.2485	-4.66892	0.98593	-4.73555	2.18×10^-06	8.33×10^-05
TRINITY_DN19843_c0_g1	FTC	FT	60.9023	5.90936	42.5713	3.34774	0.706967	4.73536	2.19×10^-06	8.33×10^-05
TRINITY_DN6140_c4_g1	FTC	FT	3.45347	42.6061	16.5043	-3.60646	0.761683	-4.73486	2.19×10^-06	8.35×10^-05
TRINITY_DN90939_c1_g1	FTC	FT	40.0577	0	26.7052	8.39926	1.77402	4.73459	2.19×10^-06	8.36×10^-05
TRINITY_DN4489_c0_g1	FTC	FT	5.23263	140.407	50.2908	-4.7153	0.99641	-4.73228	2.22×10^-06	8.45×10^-05
TRINITY_DN8860_c2_g1	FTC	FT	23.988	0	15.992	7.64343	1.61586	4.73025	2.24×10^-06	8.53×10^-05
TRINITY_DN2182_c4_g1	FTC	FT	170.676	0	113.784	10.482	2.21622	4.72968	2.25×10^-06	8.55×10^-05
TRINITY_DN4051_c9_g1	FTC	FT	101.478	4.54593	69.167	4.4863	0.948578	4.7295	2.25×10^-06	8.55×10^-05
TRINITY_DN73730_c0_g1	FTC	FT	14.4105	105.366	44.7289	-2.88635	0.610559	-4.72738	2.27×10^-06	8.63×10^-05
TRINITY_DN12848_c1_g1	FTC	FT	1.70041	146.039	49.8133	-6.40076	1.35398	-4.72737	2.27×10^-06	8.63×10^-05
TRINITY_DN1812_c4_g1	FTC	FT	15.9757	137.722	56.558	-3.09778	0.655325	-4.72708	2.28×10^-06	8.64×10^-05
TRINITY_DN51150_c1_g1	FTC	FT	0	188.766	62.9219	-9.71602	2.05542	-4.72703	2.28×10^-06	8.64×10^-05
TRINITY_DN32204_c0_g1	FTC	FT	3.43859	335.592	114.156	-6.69592	1.41668	-4.72649	2.28×10^-06	8.65×10^-05
TRINITY_DN14329_c0_g1	FTC	FT	43.5844	5.84476	31.0045	2.907	0.615053	4.72643	2.29×10^-06	8.65×10^-05
TRINITY_DN41822_c0_g1	FTC	FT	53.9031	0	35.9354	8.82558	1.86729	4.72641	2.29×10^-06	8.65×10^-05
TRINITY_DN5285_c3_g1	FTC	FT	0	143.595	47.8651	-9.3215	1.97247	-4.72579	2.29×10^-06	8.67×10^-05
TRINITY_DN3346_c0_g2	FTC	FT	279.685	2311.89	957.088	-3.04915	0.645218	-4.72577	2.29×10^-06	8.67×10^-05
TRINITY_DN872_c0_g2	FTC	FT	40.7389	127.12	69.5325	-1.64027	0.347138	-4.72512	2.30×10^-06	8.69×10^-05
TRINITY_DN1743_c0_g2	FTC	FT	40.703	0.954119	27.4534	5.38822	1.14044	4.72467	2.30×10^-06	8.71×10^-05
TRINITY_DN800_c0_g2	FTC	FT	422.512	64.4771	303.167	2.71211	0.574183	4.72343	2.32×10^-06	8.76×10^-05
TRINITY_DN1506_c5_g1	FTC	FT	90.6237	0	60.4158	9.56761	2.02563	4.72327	2.32×10^-06	8.76×10^-05
TRINITY_DN2396_c0_g4	FTC	FT	102.91	388.7	198.173	-1.91688	0.405845	-4.72318	2.32×10^-06	8.76×10^-05
TRINITY_DN34361_c1_g1	FTC	FT	0	168.15	56.0499	-9.54928	2.02233	-4.72192	2.34×10^-06	8.81×10^-05
TRINITY_DN76190_c0_g1	FTC	FT	0	150.671	50.2238	-9.39085	1.98932	-4.72062	2.35×10^-06	8.86×10^-05
TRINITY_DN1103_c1_g1	FTC	FT	16690.4	1749.26	11710	3.25418	0.689907	4.71684	2.40×10^-06	9.02×10^-05
TRINITY_DN66181_c1_g2	FTC	FT	33.641	0	22.4273	8.12968	1.72417	4.71514	2.42×10^-06	9.09×10^-05
TRINITY_DN2818_c10_g1	FTC	FT	0	213.35	71.1166	-9.89275	2.09877	-4.71359	2.43×10^-06	9.16×10^-05
TRINITY_DN1768_c4_g1	FTC	FT	35.334	0	23.556	8.20591	1.74128	4.71258	2.45×10^-06	9.20×10^-05
TRINITY_DN1874_c0_g2	FTC	FT	44.3207	4.46589	31.0358	3.31147	0.702825	4.71165	2.46×10^-06	9.24×10^-05
TRINITY_DN24995_c1_g1	FTC	FT	81.5329	20.0119	61.0259	2.01663	0.428036	4.71136	2.46×10^-06	9.24×10^-05
TRINITY_DN6385_c8_g1	FTC	FT	71.6667	20.6613	54.6649	1.79768	0.381657	4.7102	2.47×10^-06	9.29×10^-05
TRINITY_DN18697_c4_g1	FTC	FT	0	146.03	48.6766	-9.34572	1.9846	-4.70911	2.49×10^-06	9.34×10^-05
TRINITY_DN130693_c0_g1	FTC	FT	0	142.447	47.4824	-9.3099	1.9773	-4.7084	2.50×10^-06	9.37×10^-05
TRINITY_DN80799_c0_g2	FTC	FT	2696.23	1.29884	1797.92	11.0203	2.34065	4.70819	2.50×10^-06	9.37×10^-05
TRINITY_DN33115_c2_g1	FTC	FT	1.4296	60.9899	21.283	-5.58683	1.1867	-4.70786	2.50×10^-06	9.38×10^-05
TRINITY_DN3649_c1_g3	FTC	FT	845.548	250.687	647.261	1.75477	0.372752	4.70762	2.51×10^-06	9.39×10^-05
TRINITY_DN3988_c1_g1	FTC	FT	97.9167	13.1084	69.6472	2.89849	0.615743	4.7073	2.51×10^-06	9.40×10^-05
TRINITY_DN13135_c3_g1	FTC	FT	46.4267	11.5695	34.8076	2.00634	0.426282	4.7066	2.52×10^-06	9.42×10^-05
TRINITY_DN79634_c1_g1	FTC	FT	0	253.573	84.5243	-10.1418	2.15509	-4.70598	2.53×10^-06	9.45×10^-05
TRINITY_DN14136_c2_g1	FTC	FT	0	143.802	47.9339	-9.32354	1.98178	-4.70463	2.54×10^-06	9.51×10^-05
TRINITY_DN3939_c1_g2	FTC	FT	0	141.678	47.2259	-9.30209	1.97786	-4.70311	2.56×10^-06	9.57×10^-05
TRINITY_DN6226_c0_g3	FTC	FT	3.95518	77.9302	28.6135	-4.2754	0.909211	-4.70232	2.57×10^-06	9.60×10^-05
TRINITY_DN2724_c2_g1	FTC	FT	469.748	214.597	384.698	1.13276	0.240912	4.70194	2.58×10^-06	9.62×10^-05
TRINITY_DN2881_c0_g1	FTC	FT	254.602	29.6795	179.628	3.10472	0.660425	4.70109	2.59×10^-06	9.65×10^-05
TRINITY_DN4836_c0_g1	FTC	FT	2.84051	188.873	64.8512	-6.1379	1.30581	-4.70046	2.60×10^-06	9.68×10^-05
TRINITY_DN83958_c1_g1	FTC	FT	0	146.267	48.7555	-9.34811	1.98883	-4.70031	2.60×10^-06	9.68×10^-05
TRINITY_DN20317_c0_g1	FTC	FT	0	159.345	53.1149	-9.47159	2.01564	-4.69905	2.61×10^-06	9.73×10^-05
TRINITY_DN6366_c2_g1	FTC	FT	0	184.789	61.5964	-9.6853	2.06116	-4.69897	2.61×10^-06	9.73×10^-05
TRINITY_DN1828_c3_g1	FTC	FT	0	213.574	71.1915	-9.89427	2.10564	-4.69894	2.62×10^-06	9.73×10^-05
TRINITY_DN2090_c1_g1	FTC	FT	220.086	1430.18	623.451	-2.6967	0.574035	-4.6978	2.63×10^-06	9.78×10^-05
TRINITY_DN47833_c0_g4	FTC	FT	593.084	146.978	444.382	2.01368	0.428728	4.69689	2.64×10^-06	9.82×10^-05
TRINITY_DN52487_c0_g1	FTC	FT	40.3785	0	26.919	8.39558	1.7875	4.69683	2.64×10^-06	9.82×10^-05
TRINITY_DN4694_c1_g2	FTC	FT	12.7609	92.916	39.4793	-2.86781	0.610807	-4.69511	2.66×10^-06	9.89×10^-05
TRINITY_DN29748_c1_g1	FTC	FT	7.20105	96.4706	36.9576	-3.73246	0.795283	-4.69325	2.69×10^-06	9.98×10^-05
TRINITY_DN11595_c2_g1	FTC	FT	34.9246	0	23.2831	8.19242	1.74561	4.69317	2.69×10^-06	9.98×10^-05
TRINITY_DN396_c12_g1	FTC	FT	74.2632	182.376	110.301	-1.28809	0.274477	-4.69288	2.69×10^-06	9.99×10^-05
TRINITY_DN2956_c1_g2	FTC	FT	79.3788	236.637	131.798	-1.57291	0.335218	-4.6922	2.70×10^-06	0.000100162
TRINITY_DN33067_c0_g1	FTC	FT	405.64	26.4907	279.257	3.93439	0.838523	4.69205	2.70×10^-06	0.000100186
TRINITY_DN14374_c0_g3	FTC	FT	86.1798	2.41303	58.2575	5.1848	1.10526	4.69103	2.72×10^-06	0.000100638
TRINITY_DN44303_c0_g2	FTC	FT	3.20261	59.0353	21.8135	-4.19691	0.894733	-4.69068	2.72×10^-06	0.00010076
TRINITY_DN2549_c5_g1	FTC	FT	11.7528	78.798	34.1012	-2.74465	0.585199	-4.69011	2.73×10^-06	0.00010099
TRINITY_DN3984_c0_g1	FTC	FT	1046.59	328.35	807.177	1.6733	0.356924	4.68811	2.76×10^-06	0.00010193
TRINITY_DN6499_c0_g2	FTC	FT	8.59353	48.2816	21.8229	-2.49486	0.53228	-4.68712	2.77×10^-06	0.000102373
TRINITY_DN3977_c9_g1	FTC	FT	0	140.499	46.833	-9.29003	1.98278	-4.68535	2.79×10^-06	0.000103053
TRINITY_DN42760_c3_g1	FTC	FT	0	140.499	46.833	-9.29003	1.98278	-4.68535	2.79×10^-06	0.000103053
TRINITY_DN50730_c2_g1	FTC	FT	0	140.499	46.833	-9.29003	1.98278	-4.68535	2.79×10^-06	0.000103053
TRINITY_DN687_c10_g1	FTC	FT	0	140.499	46.833	-9.29003	1.98278	-4.68535	2.79×10^-06	0.000103053
TRINITY_DN378_c10_g1	FTC	FT	4.2631	70.8266	26.4509	-3.98866	0.852291	-4.67993	2.87×10^-06	0.000105742
TRINITY_DN11969_c11_g1	FTC	FT	0	144.928	48.3092	-9.33485	1.99468	-4.67987	2.87×10^-06	0.000105742
TRINITY_DN26199_c0_g2	FTC	FT	1776.24	812.225	1454.9	1.1285	0.241151	4.67964	2.87×10^-06	0.000105809
TRINITY_DN83798_c0_g2	FTC	FT	0	165.79	55.2633	-9.52878	2.0374	-4.67693	2.91×10^-06	0.000107162
TRINITY_DN21779_c0_g2	FTC	FT	64.4174	2.1329	43.6559	4.88394	1.04489	4.6741	2.95×10^-06	0.000108596
TRINITY_DN43809_c0_g1	FTC	FT	48.8864	0	32.5909	8.68052	1.85769	4.67275	2.97×10^-06	0.000109257
TRINITY_DN3184_c0_g1	FTC	FT	3972.77	657.048	2867.53	2.59608	0.555801	4.67088	3.00×10^-06	0.000110202
TRINITY_DN26797_c0_g2	FTC	FT	23.6502	0	15.7668	7.6242	1.6329	4.66911	3.03×10^-06	0.000111103
TRINITY_DN2564_c24_g1	FTC	FT	75.6583	264.763	138.693	-1.81485	0.389045	-4.6649	3.09×10^-06	0.000113345
[truncated: 820 more rows]
